# Supplementary material for: In search for an optimal methodology to calculate the valence electron affinities of temporary anions
Source: Royal Society of Chemistry journal article supplement (doi:10.1039/b908870a), 2009-01-01
Supplement: b908870a.pdf [file b908870a.pdf]

# In search for an optimal methodology to calculate the valence electron affinities of temporary anions.

Marcelo Puiatti, D. Mariano A. Vera\* and Adriana B. Pierini\*

INFIQC, Departamento de Química Orgánica. Facultad de Ciencias Químicas, Universidad Nacional de Córdoba

## Electronic Supporting Information (ESI). Supplementary Material

### Table of Contents

|                                                                                                                                                                    |    |
|--------------------------------------------------------------------------------------------------------------------------------------------------------------------|----|
| Part 1. Chemical structures of all compounds under study.....                                                                                                      | 2  |
| Part 2. Details about DFT calculations by using B3LYP/6-311+G(2df,p)//B3LYP/6-31+G*.....                                                                           | 5  |
| 2.1. Table S1. Gas phase calculation details for the compounds on Table 1 in main text.....                                                                        | 5  |
| 2.2. Table S2. Gas phase calculation details for the compounds on Table 2 in main text.....                                                                        | 6  |
| Part 3. Details concerning the extrapolation of $\Delta E$ vs. $(1/\epsilon)$ .....                                                                                | 7  |
| 3.3. Table S3. $\Delta E$ vs $(1/\epsilon)$ extrapolation details for the V anions on Table 1 (main text).....                                                     | 7  |
| 3.4. Table S4. $\Delta E$ vs $(1/\epsilon)$ extrapolation details for the N anions on Table 2.....                                                                 | 16 |
| 3.5. $\Delta E$ vs. $1/\epsilon$ profiles obtained for some compounds on tables 1 and 2.....                                                                       | 27 |
| Part 4. Comparison of the results obtained with different functionals and basis sets.....                                                                          | 28 |
| 4.1. Table S5. Electron affinities obtained with the 6-311+G(2df,p) and Aug-CC-pVTZ basis sets.....                                                                | 28 |
| 4.2. Table S6. Gas phase calculation details for the compounds on Table S5.....                                                                                    | 29 |
| 4.3. Table S7. Comparison between B3PW91, B1B95 and B3LYP functionals. Electron affinities obtained with the three functionals with 6-311+G(2df,p) basis sets..... | 30 |
| 4.4. Table S8. Gas phase calculation details for the compounds on Table S7 with the B3PW91 and B1B95 functionals.....                                              | 32 |
| Part 5. TD-DFT Calculation details and summary of results obtained with the PBE0 functional.....                                                                   | 33 |
| 5.1. Table S9. TD-DFT calculation details for the compounds on Table 3 with the B3LYP functional.....                                                              | 33 |
| 5.2. Table S10. TD-DFT calculation details for the compounds on Table 3 with the PBE0 functional.....                                                              | 34 |
| 5.3. Comparison of results obtained with B3LYP and PBE0 functionals for compounds with valence anion ground state (compounds on main text table1).....             | 35 |
| Part 6. Prediction of EAs.....                                                                                                                                     | 36 |
| 6-1 Table S11. Gas phase calculation details for the compounds on Table 4 (main text).....                                                                         | 36 |
| 6-2 Table S12. $\Delta E$ vs $(1/\epsilon)$ extrapolation details for the compounds on Table 4 (main text).....                                                    | 37 |
| Part 7. XYZ Coordinates.....                                                                                                                                       | 40 |

# Part 1. Chemical structures of all compounds under study

**Chart 1A.**  
compounds  
on Table 1

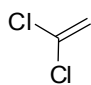

1,1-dichloroethylene

**1**

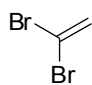

1,1-dibromoethylene

**2**

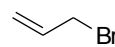

3-bromo-1-propene

**3**

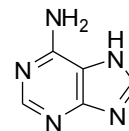

adenine

**4**

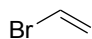

bromoethylene

**5**

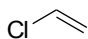

chloroethylene

**6**

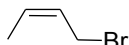

cis-1-bromo-2-butene

**7**

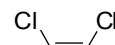

cis-1,2-dichloroethylene

**8**

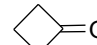

cyclobutanone

**9**

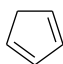

cyclopentadiene

**10**

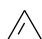

cyclopropene

**11**

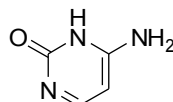

cytosine

**12**

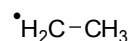

ethyl radical

**13**

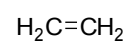

ethylene

**14**

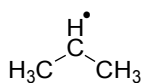

isopropyl radical

**15**

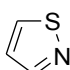

isothiazole

**16**

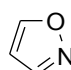

isooxazole

**17**

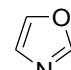

oxazole

**18**

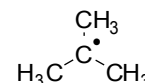

tert-butyl radical

**19**

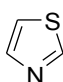

thiazole

**20**

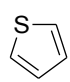

thiophene

**21**

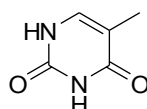

thymine

**22**

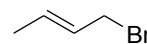

trans-bromo-2-butene

**23**

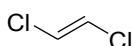

trans-1,2-dichloroethylene

**24**

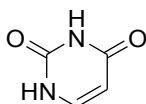

uracil

**25**

**Chart 1B**  
compounds  
on Table 2

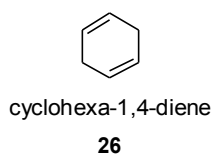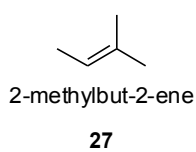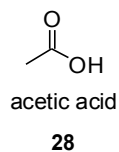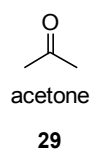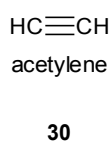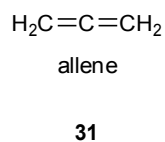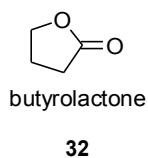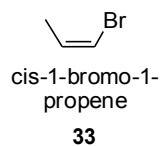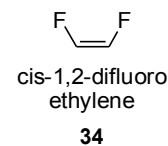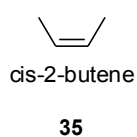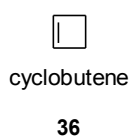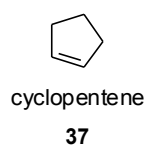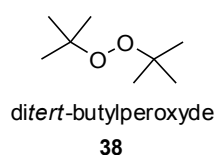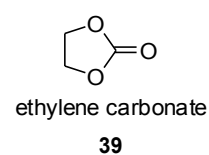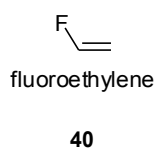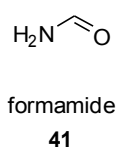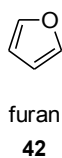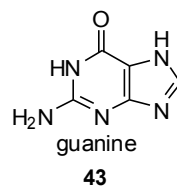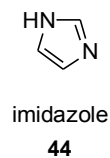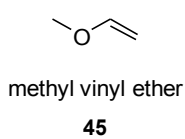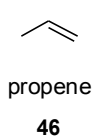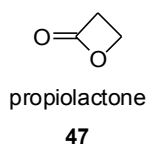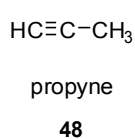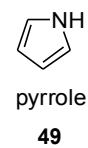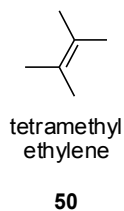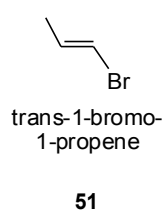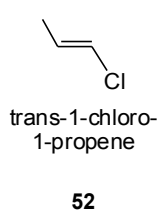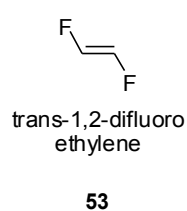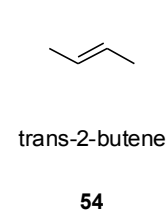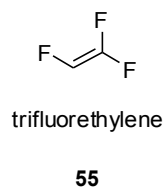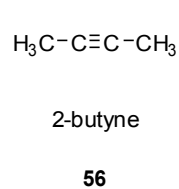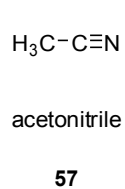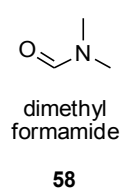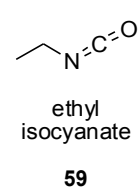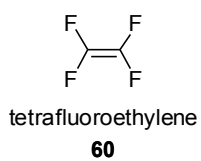

**Chart 2.**  
compounds  
on Table 4

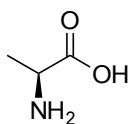

$\alpha$  -L-alanine

**61**

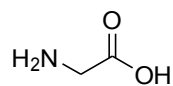

$\alpha$  -L-glycine

**62**

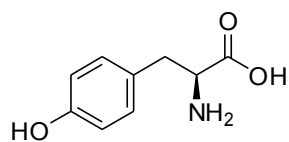

$\alpha$  -L-tyrosine

**63**

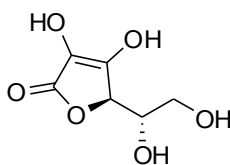

ascorbic acid  
(vitamin C)

**64**

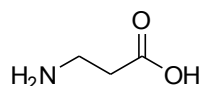

$\beta$  -alanine

**65**

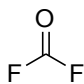

carbonic difluoride

**66**

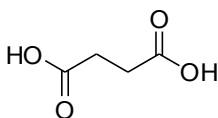

succinic acid

**67**

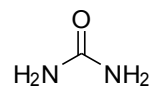

urea

**68**

## Part 2. Details about DFT calculations by using B3LYP/6-311+G(2df,p)//B3LYP/6-31+G\*

### 2.1. Table S1. Gas phase calculation details for the compounds on Table 1 in main text

|     | Species                           | Anion<br>Type | B3LYP/6-31+G* - |        |            |        | B3LYP/6-311+G(2df,p)//B3LYP/6-31+G* |            |
|-----|-----------------------------------|---------------|-----------------|--------|------------|--------|-------------------------------------|------------|
|     |                                   |               | E(neutral)      | ZPE    | E(anion)   | ZPE    | E(neutral)                          | E(anion)   |
| 1   | <b>1,1-dichloroethylene</b>       | V             | -997.7811       | 0.0336 | -997.7453  |        | -997.8702                           | -997.8382  |
| 2   | <b>2-bromo-1-propene</b>          | V             | -2689.0391      | 0.0708 | -2688.9958 |        | -2691.4954                          | -2691.4541 |
| 3   | <b>3-bromo-1-propene</b>          | V             | -2689.0335      | 0.0713 | -2689.0153 |        | -2691.4925                          | -2691.4762 |
| 4   | <b>Adenine</b>                    | V             | -467.3399       | 0.1120 | 467.3100   |        | -467.4799                           | -467.4507  |
| 5   | <b>Bromoethylene</b>              | V             | -2649.7127      | 0.0422 | -2649.6670 |        | -2652.1622                          | -2652.1190 |
| 6   | <b>Chloroethylene</b>             | V             | -538.2480       | 0.0428 | -538.1995  |        | -538.2480                           | -538.1995  |
| 7   | <b>cis-1-bromo-2-butene</b>       | V             | -2728.3537      | 0.0999 | -2728.3347 |        | -2730.8221                          | -2730.8051 |
| 8   | <b>cis-1,2-dichloroethylene</b>   | V             | -997.7843       | 0.0342 | -997.7348  |        | -997.8727                           | -997.8282  |
| 9   | <b>Cyclobutanone</b>              | V             | -231.2396       | 0.0909 | -231.1958  |        | -231.3081                           | -231.2691  |
| 10  | <b>Cyclopentadiene</b>            | V             | -194.1103       | 0.0926 | -194.0641  |        | -194.1659                           | -194.1226  |
| 11  | <b>Cyclopropene</b>               | V             | -116.6248       | 0.0560 | -116.5621  |        | -116.6603                           | -116.6000  |
| 12  | <b>Cytosine</b>                   | V             | -395.0575       | 0.0984 | -395.0550  |        | -395.0752                           | -395.0550  |
| 13  | <b>Cytosine*</b>                  | V             |                 |        | -395.0687  | 0.0944 |                                     | -395.0687  |
| 13a | <b>Ethyl Radical*</b>             | V             | -79.1879        | 0.0595 | -79.1769   | 0.0578 | -79.1879                            | -79.1769   |
| 14  | <b>Ethylene</b>                   | V             | -78.6192        | 0.0511 | -78.5565   |        | -78.6192                            | -78.5565   |
| 15  | <b>Isopropil radical*</b>         | V             | -118.4837       | 0.0882 | -118.4686  | 0.0860 | -118.5199                           | -118.5068  |
| 16  | <b>isothiazole</b>                | V             | -569.0498       | 0.0551 | -569.0213  |        | -569.1355                           | -569.1072  |
| 17  | <b>Isoxazole</b>                  | V             | -246.0455       | 0.0580 | -246.0002  |        | -246.1189                           | -246.0760  |
| 18  | <b>Oxazole</b>                    | V             | -246.0812       | 0.0586 | -246.0296  |        | -246.1552                           | -246.1043  |
| 19  | <b>t-Butyl radical*</b>           | V             | -157.8045       | 0.1169 | -157.7761  | 0.1142 | -157.8515                           | -157.8432  |
| 20  | <b>Thiazole</b>                   | V             | -569.0563       | 0.0552 | -569.0210  |        | -569.1386                           | -569.1053  |
| 21  | <b>Thiophene</b>                  | V             | -553.0895       | 0.0667 | -553.0438  |        | -553.0895                           | -553.0438  |
| 22  | <b>Thymine</b>                    | V             | -454.3001       | 0.1149 | -454.2890  |        | -454.3001                           | -454.2890  |
| 23  | <b>trans-1-bromo-2-butene</b>     | V             | -2728.3558      | 0.0996 | -2728.3331 |        | -2730.8247                          | -2730.8040 |
| 24  | <b>trans-1,2-dichloroethylene</b> | V             | -997.7839       | 0.0339 | -997.7433  |        | -997.8722                           | -997.8361  |
| 25  | <b>Uracil</b>                     | V             | -414.9689       | 0.0871 | -414.9588  |        | -414.9689                           | -414.9588  |
| 25a | <b>Uracil*</b>                    | V             |                 |        | -414.8401  | 0.0827 |                                     | -414.9708  |

\* AEA were calculated for these compounds. All energies in Hartree

## 2.2. Table S2. Gas phase calculation details for the compounds on Table 2 in main text

|    | Species                    | Anion Type | B3LYP/6-31+G* |        |            | B3LYP/6-311+G(2df,p)//B3LYP/6-31+G* |            |
|----|----------------------------|------------|---------------|--------|------------|-------------------------------------|------------|
|    |                            |            | E(neutral)    | ZPE    | E(anion)   | E(neutral)                          | E(anion)   |
| 26 | 1,4-Cyclohexadiene         | N          | -233.4280     | 0.1222 | -233.3770  | -233.4951                           | -233.4548  |
| 27 | 2-methyl-2-butene          | N          | -196.6068     | 0.1356 | -196.5657  | -196.6068                           | -196.5657  |
| 28 | acetic acid                | N          | -229.0961     | 0.0618 | -229.0548  | -229.1754                           | -229.1379  |
| 29 | Acetone                    | N          | -193.2267     | 0.0838 | -193.1882  | -193.2267                           | -193.1882  |
| 30 | Acetylene                  | N          | -77.3331      | 0.0268 | -77.2804   | -77.3602                            | -77.3115   |
| 31 | Allene                     | N          | -116.6651     | 0.0553 | -116.6092  | -116.7017                           | -116.6515  |
| 32 | Butyrolactone              | N          | -306.5062     | 0.0988 | -306.4651  | -306.6008                           | -306.5656  |
| 33 | cis-1-bromo-1-propene      | N          | -2689.0354    | 0.0708 | -2688.9946 | -2691.4952                          | -2691.4580 |
| 34 | cis-1,2-difluoroethylene   | N          | -277.0666     | 0.0370 | -277.0218  | -277.1563                           | -277.1144  |
| 35 | cis-2-butene               | N          | -157.2778     | 0.1079 | -157.2341  | -157.2778                           | -157.2341  |
| 36 | Cyclobutene                | N          | -155.9797     | 0.0866 | -155.9151  | -156.0244                           | -155.9721  |
| 37 | Cyclopentene               | N          | -195.3345     | 0.1169 | -195.2780  | -195.3905                           | -195.3443  |
| 38 | di-tert-butyl-peroxide     | N          | -466.0834     | 0.2514 | -466.0407  | -466.2245                           | -466.1880  |
| 39 | Ethylene Carbonate         | N          | -305.2452     | 0.0719 | -305.2772  | -342.5234                           | -342.4911  |
| 40 | Fluoroethylene             | N          | -177.8355     | 0.0440 | -177.7757  | -177.8931                           | -177.8355  |
| 41 | Formamide                  | N          | -169.9025     | 0.0454 | -169.8592  | -169.9624                           | -169.9215  |
| 42 | Furan                      | N          | -230.1010     | 0.0700 | -230.0560  | -230.1010                           | -230.0560  |
| 43 | Guanine                    | N          | -542.7286     | 0.1168 | -542.7297  | -542.7433                           | -542.7286  |
| 44 | Imidazole                  | N          | -226.2269     | 0.0712 | -226.1892  | -226.2950                           | -226.2620  |
| 45 | vinyl ether                | N          | -193.1212     | 0.0844 | -193.0672  | -193.1841                           | -193.1381  |
| 46 | Propene                    | N          | -117.9509     | 0.0798 | -117.9020  | -117.9509                           | -117.9020  |
| 47 | propyne                    | N          | -116.6611     | 0.0568 | -117.9020  | -116.6987                           | -116.6550  |
| 48 | Propiolactone              | N          | -267.1665     | 0.0689 | -267.1249  | -267.2501                           | -267.2128  |
| 49 | Pyrrrole                   | N          | -210.2417     | 0.0825 | -210.2060  | -210.2417                           | -210.2060  |
| 50 | tetramethylethylene        | N          | -235.8592     | 0.1627 | -235.8106  | -235.9288                           | -235.8889  |
| 51 | trans-1-bromo-1-propene    | N          | -2689.0358    | 0.0707 | -2688.9989 | -2691.4935                          | -2691.4592 |
| 52 | trans-1-chloro-1-propene   | N          | -577.5113     | 0.0711 | -577.4629  | -577.5792                           | -577.5373  |
| 53 | trans-1,2-difluoroethylene | N          | -277.0657     | 0.0366 | -277.0144  | -277.1563                           | -277.1144  |
| 54 | trans-2-butene             | N          | -157.2815     | 0.1081 | -157.2301  | -157.2815                           | -157.2301  |
| 55 | trifluoroethylene          | N          | -376.3042     | 0.0292 | -376.2596  | -376.4265                           | -376.3837  |
| 56 | 2-butyne                   | N          | -155.9867     | 0.0847 | -155.9392  | -156.0349                           | -155.9925  |
| 57 | acetonitrile               | N          | -132.7617     | 0.0455 | -132.7243  | -132.8024                           | -132.7701  |
| 58 | dimethylformamide          | N          | -248.5242     | 0.1027 | -248.4822  | -248.6018                           | -248.5665  |
| 59 | ethyl isocyanate           | N          | -247.3160     | 0.0791 | -247.2796  | -247.3955                           | -247.3642  |
| 60 | tetrafluoroethylene        | N          | -475.5364     | 0.0213 | -475.4951  | -475.6918                           | -475.6504  |

All energies in Hartrees

## Part 3. Details concerning the extrapolation of $\Delta E$ vs. $(1/\epsilon)$ .

### 3.3. Table S3. $\Delta E$ vs $(1/\epsilon)$ extrapolation details for the V anions on Table 1 (main text)

| Species                     | Media                | $\epsilon$ | type   | $E(\text{neutral})$ | $E(\text{anion})$ | $\Delta E / \text{eV}$ |
|-----------------------------|----------------------|------------|--------|---------------------|-------------------|------------------------|
| <b>1,1-dichloroethylene</b> | Argon                | 1.43       | V      | -997.8708           | -997.8614         | -0.2543                |
|                             | Krypton              | 1.52       | V      | -997.8708           | -997.8646         | -0.1687                |
|                             | Heptane              | 1.92       | V      | -997.8711           | -997.8755         | 0.1203                 |
|                             | Ciclohexane          | 2.02       | V      | -997.8712           | -997.8777         | 0.1764                 |
|                             | Benzene              | 2.25       | V      | -997.8713           | -997.8816         | 0.2812                 |
|                             | Ethyl Ether          | 4.34       | V      | -997.8719           | -997.8992         | 0.7424                 |
|                             | Chloroform           | 4.90       | V      | -997.8720           | -997.9014         | 0.8006                 |
|                             | Chlorobenzene        | 5.62       | V      | -997.8721           | -997.9036         | 0.8576                 |
|                             | Tetrahydrofuran      | 7.58       | V      | -997.8723           | -997.9075         | 0.9588                 |
|                             | Dichloroethane       | 10.36      | V      | -997.8724           | -997.9105         | 1.0370                 |
|                             | Acetone              | 20.70      | V      | -997.8726           | -997.9147         | 1.1442                 |
|                             | Ethanol              | 24.55      | V      | -997.8727           | -997.9153         | 1.1612                 |
|                             | Acetonitrile         | 36.64      | V      | -997.8727           | -997.9165         | 1.1912                 |
|                             | Dimethylsulfoxide    | 46.70      | V      | -997.8727           | -997.9170         | 1.2042                 |
|                             | Water                | 78.39      | V      | -997.8728           | -997.9178         | 1.2241                 |
|                             | EA experimental /eV  |            |        | -0.7500             |                   |                        |
|                             | EA Linear extrap./eV |            |        | -0.9100             |                   |                        |
| R <sup>2</sup>              |                      |            | 0.9999 |                     |                   |                        |
| Species                     | Media                | $\epsilon$ | type   | $E(\text{neutral})$ | $E(\text{anion})$ | $\Delta E / \text{eV}$ |
| <b>2-bromo-1-propene</b>    | Argon                | 1.43       | V      | -2691.4959          | -2691.4750        | -0.5689                |
|                             | Krypton              | 1.52       | V      | -2691.4960          | -2691.4780        | -0.4908                |
|                             | Heptane              | 1.92       | V      | -2691.4964          | -2691.4881        | -0.2237                |
|                             | Ciclohexane          | 2.02       | V      | -2691.4964          | -2691.4901        | -0.1712                |
|                             | Benzene              | 2.25       | V      | -2691.4966          | -2691.4939        | -0.0729                |
|                             | Ethyl Ether          | 4.34       | V      | -2691.4973          | -2691.5108        | 0.3673                 |
|                             | Chloroform           | 4.90       | V      | -2691.4974          | -2691.5129        | 0.4239                 |
|                             | Chlorobenzene        | 5.62       | V      | -2691.4975          | -2691.5151        | 0.4793                 |
|                             | Tetrahydrofuran      | 7.58       | V      | -2691.4977          | -2691.5189        | 0.5786                 |
|                             | Dichloroethane       | 10.36      | V      | -2691.4978          | -2691.5219        | 0.6558                 |
|                             | Acetone              | 20.70      | V      | -2691.4980          | -2691.5261        | 0.7625                 |
|                             | Ethanol              | 24.55      | V      | -2691.4981          | -2691.5267        | 0.7800                 |
|                             | Acetonitrile         | 36.64      | V      | -2691.4981          | -2691.5279        | 0.8119                 |
|                             | Dimethylsulfoxide    | 46.70      | V      | -2691.4982          | -2691.5284        | 0.8224                 |
|                             | EA experimental /eV  |            |        | -1.3100             |                   |                        |
|                             | EA Linear extrap./eV |            |        | -1.2000             |                   |                        |
|                             | R <sup>2</sup>       |            |        | 0.9996              |                   |                        |
| Species                     | Media                | $\epsilon$ | type   | $E(\text{neutral})$ | $E(\text{anion})$ | $\Delta E / \text{eV}$ |
| <b>3-bromo-1-propene</b>    | Argon                | 1.43       | V      | -2691.4937          | -2691.4990        | 0.1449                 |
|                             | Krypton              | 1.52       | V      | -2691.4938          | -2691.5022        | 0.2270                 |
|                             | Heptane              | 1.92       | V      | -2691.4945          | -2691.5130        | 0.5051                 |
|                             | Ciclohexane          | 2.02       | V      | -2691.4946          | -2691.5152        | 0.5597                 |
|                             | Benzene              | 2.25       | V      | -2691.4949          | -2691.5192        | 0.6612                 |
|                             | Ethyl Ether          | 4.34       | V      | -2691.4962          | -2691.5370        | 1.1108                 |
|                             | Chloroform           | 4.90       | V      | -2691.4964          | -2691.5393        | 1.1682                 |
|                             | Chlorobenzene        | 5.62       | V      | -2691.4966          | -2691.5416        | 1.2240                 |
|                             | Tetrahydrofuran      | 7.58       | V      | -2691.4970          | -2691.5456        | 1.3242                 |
|                             | Dichloroethane       | 10.36      | V      | -2691.4973          | -2691.5488        | 1.4018                 |
|                             | Acetone              | 20.70      | V      | -2691.4977          | -2691.5532        | 1.5088                 |
|                             | Ethanol              | 24.55      | V      | -2691.4978          | -2691.5539        | 1.5264                 |
|                             | Acetonitrile         | 36.64      | V      | -2691.4982          | -2691.5551        | 1.5505                 |
|                             | Dimethylsulfoxide    | 46.70      | V      | -2691.4980          | -2691.5556        | 1.5688                 |
|                             | Water                | 78.39      | V      | -2691.4981          | -2691.5566        | 1.5917                 |
|                             | EA experimental /eV  |            |        | -0.6000             |                   |                        |
|                             | EA Linear extrap./eV |            |        | -0.5011             |                   |                        |
| R <sup>2</sup>              |                      |            | 0.9998 |                     |                   |                        |

| Species        | Media                | $\epsilon$          | type   | $E(\text{neutral})$ | $E(\text{anion})$ | $\Delta E / \text{eV}$ |
|----------------|----------------------|---------------------|--------|---------------------|-------------------|------------------------|
| <b>Adenine</b> | Argon                | 1.43                | V      | -467.4833           | -467.4773         | -0.165                 |
|                | Krypton              | 1.52                | V      | -467.4842           | -467.4811         | -0.085                 |
|                | Heptane              | 1.92                | V      | -467.4873           | -467.4941         | 0.187                  |
|                | Ciclohexane          | 2.02                | V      | -467.4880           | -467.4968         | 0.240                  |
|                | Benzene              | 2.25                | V      | -467.4894           | -467.5018         | 0.339                  |
|                | Ethyl Ether          | 4.34                | V      | -467.4960           | -467.5247         | 0.781                  |
|                | Chloroform           | 4.90                | V      | -467.4971           | -467.5279         | 0.837                  |
|                | Chlorobenzene        | 5.62                | V      | -467.4980           | -467.5308         | 0.893                  |
|                | Tetrahydrofuran      | 7.58                | V      | -467.4999           | -467.5364         | 0.993                  |
|                | Dichloroethane       | 10.36               | V      | -467.5014           | -467.5408         | 1.070                  |
|                | Acetone              | 20.70               | V      | -467.5036           | -467.5469         | 1.177                  |
|                | Ethanol              | 24.55               | V      | -467.5040           | -467.5479         | 1.194                  |
|                | Acetonitrile         | 36.64               | V      | -467.5049           | -467.5497         | 1.219                  |
|                | Dimethylsulfoxide    | 46.70               | V      | -467.5055           | -467.5504         | 1.220                  |
|                | Water                | 78.39               | V      | -467.5055           | -467.5518         | 1.259                  |
|                |                      | EA experimental /eV |        | -0.64               |                   |                        |
|                | EA Linear extrap./eV |                     | -0.80  |                     |                   |                        |
|                | $R^2$                |                     | 0.9997 |                     |                   |                        |

| Species              | Media             | $\epsilon$           | type   | $E(\text{neutral})$ | $E(\text{anion})$ | $\Delta E / \text{eV}$ |  |
|----------------------|-------------------|----------------------|--------|---------------------|-------------------|------------------------|--|
| <b>Bromoethylene</b> | Argon             | 1.43                 | V      | -2652.1630          | -2652.1427        | -0.553                 |  |
|                      | Krypton           | 1.52                 | V      | -2652.1631          | -2652.1460        | -0.466                 |  |
|                      | Heptane           | 1.92                 | V      | -2652.1636          | -2652.1572        | -0.172                 |  |
|                      | Ciclohexane       | 2.02                 | V      | -2652.1636          | -2652.1594        | -0.115                 |  |
|                      | Benzene           | 2.25                 | V      | -2652.1638          | -2652.1635        | -0.008                 |  |
|                      | Ethyl Ether       | 4.34                 | V      | -2652.1648          | -2652.1818        | 0.463                  |  |
|                      | Chloroform        | 4.90                 | V      | -2652.1649          | -2652.1841        | 0.522                  |  |
|                      | Chlorobenzene     | 5.62                 | V      | -2652.1651          | -2652.1864        | 0.580                  |  |
|                      | Tetrahydrofuran   | 7.58                 | V      | -2652.1653          | -2652.1905        | 0.684                  |  |
|                      | Dichloroethane    | 10.36                | V      | -2652.1655          | -2652.1936        | 0.764                  |  |
|                      | Acetone           | 20.70                | V      | -2652.1659          | -2652.1980        | 0.874                  |  |
|                      | Ethanol           | 24.55                | V      | -2652.1659          | -2652.1987        | 0.891                  |  |
|                      | Acetonitrile      | 36.64                | V      | -2652.1660          | -2652.1999        | 0.922                  |  |
|                      | Dimethylsulfoxide | 46.70                | V      | -2652.1660          | -2652.2004        | 0.935                  |  |
|                      |                   | EA experimental /eV  |        | -1.17               |                   |                        |  |
|                      |                   | EA Linear extrap./eV |        | -1.22               |                   |                        |  |
|                      | $R^2$             |                      | 0.9999 |                     |                   |                        |  |

| Species               | Media                | $\epsilon$          | type   | $E(\text{neutral})$ | $E(\text{anion})$ | $\Delta E / \text{eV}$ |
|-----------------------|----------------------|---------------------|--------|---------------------|-------------------|------------------------|
| <b>Chloroethylene</b> | Argon                | 1.43                | V      | -538.2488           | -538.2244         | -0.663                 |
|                       | Krypton              | 1.52                | V      | -538.2489           | -538.2279         | -0.572                 |
|                       | Heptane              | 1.92                | V      | -538.2494           | -538.2396         | -0.265                 |
|                       | Ciclohexane          | 2.02                | V      | -538.2494           | -538.2419         | -0.206                 |
|                       | Benzene              | 2.25                | V      | -538.2496           | -538.2462         | -0.095                 |
|                       | Ethyl Ether          | 4.34                | V      | -538.2506           | -538.2650         | 0.394                  |
|                       | Chloroform           | 4.90                | V      | -538.2507           | -538.2674         | 0.455                  |
|                       | Chlorobenzene        | 5.62                | V      | -538.2508           | -538.2698         | 0.515                  |
|                       | Tetrahydrofuran      | 7.58                | V      | -538.2511           | -538.2740         | 0.622                  |
|                       | Dichloroethane       | 10.36               | V      | -538.2513           | -538.2772         | 0.704                  |
|                       | Acetone              | 20.70               | V      | -538.2516           | -538.2817         | 0.817                  |
|                       | Ethanol              | 24.55               | V      | -538.2517           | -538.2824         | 0.835                  |
|                       | Acetonitrile         | 36.64               | V      | -538.2518           | -538.2836         | 0.867                  |
|                       | Dimethylsulfoxide    | 46.70               | V      | -538.2518           | -538.2842         | 0.881                  |
|                       | Water                | 78.39               | V      | -538.2519           | -538.2850         | 0.902                  |
|                       |                      | EA experimental /eV |        | -1.29               |                   |                        |
|                       | EA Linear extrap./eV |                     | -1.36  |                     |                   |                        |
|                       | $R^2$                |                     | 0.9999 |                     |                   |                        |



| Species                          | Media                | $\epsilon$ | type   | $E(\text{neutral})$ | $E(\text{anion})$ | $\Delta E / \text{eV}$ |
|----------------------------------|----------------------|------------|--------|---------------------|-------------------|------------------------|
| <b>cis-1,2-dichloro-Ethylene</b> | Argon                | 1.43       | V      | -997.8737           | -997.8530         | -0.564                 |
|                                  | Krypton              | 1.52       | V      | -997.8739           | -997.8564         | -0.475                 |
|                                  | Heptane              | 1.92       | V      | -997.8746           | -997.8681         | -0.177                 |
|                                  | Ciclohexane          | 2.02       | V      | -997.8747           | -997.8703         | -0.119                 |
|                                  | Benzene              | 2.25       | V      | -997.8750           | -997.8746         | -0.011                 |
|                                  | Ethyl Ether          | 4.34       | V      | -997.8764           | -997.8933         | 0.460                  |
|                                  | Chloroform           | 4.90       | V      | -997.8766           | -997.8957         | 0.520                  |
|                                  | Chlorobenzene        | 5.62       | V      | -997.8768           | -997.8980         | 0.577                  |
|                                  | Tetrahydrofuran      | 7.58       | V      | -997.8772           | -997.9022         | 0.680                  |
|                                  | Dichloroethane       | 10.36      | V      | -997.8775           | -997.9054         | 0.759                  |
|                                  | Acetone              | 20.70      | V      | -997.8780           | -997.9099         | 0.868                  |
|                                  | Ethanol              | 24.55      | V      | -997.8781           | -997.9106         | 0.885                  |
|                                  | Acetonitrile         | 36.64      | V      | -997.8782           | -997.9118         | 0.915                  |
|                                  | Dimethylsulfoxide    | 46.70      | V      | -997.8783           | -997.9124         | 0.928                  |
|                                  | Water                | 78.39      | V      | -997.8784           | -997.9133         | 0.951                  |
|                                  | EA experimental /eV  |            |        | -1.12               |                   |                        |
|                                  | EA Linear extrap./eV |            |        | -1.23               |                   |                        |
| R <sup>2</sup>                   |                      |            | 1.0000 |                     |                   |                        |
| Species                          | Media                | $\epsilon$ | type   | $E(\text{neutral})$ | $E(\text{anion})$ | $\Delta E / \text{eV}$ |
| <b>cis-1-bromo-2-butene</b>      | Argon                | 1.43       | V      | -2730.8233          | -2730.8272        | 0.107                  |
|                                  | Krypton              | 1.52       | V      | -2730.8235          | -2730.8303        | 0.187                  |
|                                  | Heptane              | 1.92       | V      | -2730.8241          | -2730.8411        | 0.461                  |
|                                  | Ciclohexane          | 2.02       | V      | -2730.8243          | -2730.8432        | 0.515                  |
|                                  | Benzene              | 2.25       | V      | -2730.8245          | -2730.8472        | 0.616                  |
|                                  | Ethyl Ether          | 4.34       | V      | -2730.8259          | -2730.8651        | 1.067                  |
|                                  | Chloroform           | 4.90       | V      | -2730.8262          | -2730.8675        | 1.125                  |
|                                  | Chlorobenzene        | 5.62       | V      | -2730.8263          | -2730.8698        | 1.182                  |
|                                  | Tetrahydrofuran      | 7.58       | V      | -2730.8267          | -2730.8739        | 1.284                  |
|                                  | Dichloroethane       | 10.36      | V      | -2730.8271          | -2730.8772        | 1.364                  |
|                                  | Acetone              | 20.70      | V      | -2730.8275          | -2730.8817        | 1.474                  |
|                                  | Ethanol              | 24.55      | V      | -2730.8276          | -2730.8825        | 1.492                  |
|                                  | Acetonitrile         | 36.64      | V      | -2730.8280          | -2730.8838        | 1.518                  |
|                                  | Dimethylsulfoxide    | 46.70      | V      | -2730.8278          | -2730.8843        | 1.537                  |
|                                  | Water                | 78.39      | V      | -2730.8280          | -2730.8853        | 1.561                  |
|                                  | EA experimental /eV  |            |        | -0.68               |                   |                        |
|                                  | EA Linear extrap./eV |            |        | -0.55               |                   |                        |
| R <sup>2</sup>                   |                      |            | 0.9995 |                     |                   |                        |
| Species                          | Media                | $\epsilon$ | type   | $E(\text{neutral})$ | $E(\text{anion})$ | $\Delta E / \text{eV}$ |
| <b>Cyclobutanone</b>             | Argon                | 1.43       | V      | -231.3099           | -231.2947         | -0.414                 |
|                                  | Krypton              | 1.52       | V      | -231.3102           | -231.2983         | -0.324                 |
|                                  | Heptane              | 1.92       | V      | -231.3112           | -231.3107         | -0.014                 |
|                                  | Ciclohexane          | 2.02       | V      | -231.3114           | -231.3132         | 0.047                  |
|                                  | Benzene              | 2.25       | V      | -231.3118           | -231.3178         | 0.162                  |
|                                  | Ethyl Ether          | 4.34       | V      | -231.3139           | -231.3387         | 0.674                  |
|                                  | Chloroform           | 4.90       | V      | -231.3142           | -231.3415         | 0.741                  |
|                                  | Chlorobenzene        | 5.62       | V      | -231.3145           | -231.3441         | 0.805                  |
|                                  | Tetrahydrofuran      | 7.58       | V      | -231.3151           | -231.3490         | 0.922                  |
|                                  | Dichloroethane       | 10.36      | V      | -231.3156           | -231.3528         | 1.013                  |
|                                  | Acetone              | 20.70      | V      | -231.3162           | -231.3581         | 1.139                  |
|                                  | Ethanol              | 24.55      | V      | -231.3163           | -231.3589         | 1.159                  |
|                                  | Acetonitrile         | 36.64      | V      | -231.3165           | -231.3604         | 1.195                  |
|                                  | Dimethylsulfoxide    | 46.70      | V      | -231.3166           | -231.3610         | 1.209                  |
|                                  | Water                | 78.39      | V      | -231.3168           | -231.3628         | 1.250                  |
|                                  | EA experimental /eV  |            |        | -1.00               |                   |                        |
|                                  | EA Linear extrap./eV |            |        | -1.16               |                   |                        |
| R <sup>2</sup>                   |                      |            | 0.9993 |                     |                   |                        |

| Species                | Media               | $\epsilon$ | type   | $E(\text{neutral})$ | $E(\text{anion})$ | $\Delta E / \text{eV}$ |
|------------------------|---------------------|------------|--------|---------------------|-------------------|------------------------|
| <b>Cyclopentadiene</b> | Argon               | 1.43       | V      | -194.1669           | -194.1474         | -0.530                 |
|                        | Krypton             | 1.52       | V      | -194.1670           | -194.1508         | -0.440                 |
|                        | Heptane             | 1.92       | V      | -194.1676           | -194.1625         | -0.137                 |
|                        | Ciclohexane         | 2.02       | V      | -194.1677           | -194.1648         | -0.078                 |
|                        | Benzene             | 2.25       | V      | -194.1679           | -194.1691         | 0.032                  |
|                        | Ethyl Ether         | 4.34       | V      | -194.1691           | -194.1881         | 0.517                  |
|                        | Chloroform          | 4.90       | V      | -194.1693           | -194.1906         | 0.578                  |
|                        | Chlorobenzene       | 5.62       | V      | -194.1695           | -194.1930         | 0.638                  |
|                        | Tetrahydrofuran     | 7.58       | V      | -194.1699           | -194.1973         | 0.746                  |
|                        | Dichloroethane      | 10.36      | V      | -194.1701           | -194.2006         | 0.829                  |
|                        | Acetone             | 20.70      | V      | -194.1706           | -194.2052         | 0.943                  |
|                        | Ethanol             | 24.55      | V      | -194.1706           | -194.2060         | 0.961                  |
|                        | Acetonitrile        | 36.64      | V      | -194.1708           | -194.2073         | 0.993                  |
|                        | Dimethylsulfoxide   | 46.70      | V      | -194.1708           | -194.2078         | 1.007                  |
|                        | EAexperimental /eV  |            |        | -1.19               |                   |                        |
|                        | EALinear extrap./eV |            |        | -1.22               |                   |                        |
|                        | R <sup>2</sup>      |            |        | 0.9999              |                   |                        |
| Species                | Media               | $\epsilon$ | type   | $E(\text{neutral})$ | $E(\text{anion})$ | $\Delta E / \text{eV}$ |
| <b>Cyclopropene</b>    | Argon               | 1.43       | V      | -116.6610           | -116.6251         | -0.977                 |
|                        | Krypton             | 1.52       | V      | -116.6611           | -116.6286         | -0.884                 |
|                        | Heptane             | 1.92       | V      | -116.6615           | -116.6405         | -0.570                 |
|                        | Ciclohexane         | 2.02       | V      | -116.6616           | -116.6429         | -0.508                 |
|                        | Benzene             | 2.25       | V      | -116.6617           | -116.6473         | -0.394                 |
|                        | Ethyl Ether         | 4.34       | V      | -116.6626           | -116.6668         | 0.115                  |
|                        | Chloroform          | 4.90       | V      | -116.6627           | -116.6693         | 0.179                  |
|                        | Chlorobenzene       | 5.62       | V      | -116.6628           | -116.6717         | 0.242                  |
|                        | Tetrahydrofuran     | 7.58       | V      | -116.6631           | -116.6761         | 0.355                  |
|                        | Dichloroethane      | 10.36      | V      | -116.6633           | -116.6795         | 0.442                  |
|                        | Acetone             | 20.70      | V      | -116.6635           | -116.6842         | 0.562                  |
|                        | Ethanol             | 24.55      | V      | -116.6636           | -116.6849         | 0.581                  |
|                        | Acetonitrile        | 36.64      | V      | -116.6637           | -116.6863         | 0.615                  |
|                        | Dimethylsulfoxide   | 46.70      | V      | -116.6637           | -116.6868         | 0.629                  |
|                        | Water               | 78.39      | V      | -116.6638           | -116.6878         | 0.653                  |
|                        | EAexperimental /eV  |            |        | -1.73               |                   |                        |
|                        | EALinear extrap./eV |            |        | -1.71               |                   |                        |
| R <sup>2</sup>         |                     |            | 0.9998 |                     |                   |                        |
| Species                | Media               | $\epsilon$ | type   | $E(\text{neutral})$ | $E(\text{anion})$ | $\Delta E / \text{eV}$ |
| <b>Cytosine</b>        | Argon               | 1.43       | V      | -395.0822           | -395.0833         | 0.031                  |
|                        | Krypton             | 1.52       | V      | -395.0833           | -395.0873         | 0.110                  |
|                        | Heptane             | 1.92       | V      | -395.0874           | -395.1012         | 0.377                  |
|                        | Ciclohexane         | 2.02       | V      | -395.0883           | -395.1040         | 0.428                  |
|                        | Benzene             | 2.25       | V      | -395.0900           | -395.1093         | 0.525                  |
|                        | Ethyl Ether         | 4.34       | V      | -395.0988           | -395.1335         | 0.946                  |
|                        | Chloroform          | 4.90       | V      | -395.1001           | -395.1368         | 1.000                  |
|                        | Chlorobenzene       | 5.62       | V      | -395.1013           | -395.1400         | 1.052                  |
|                        | Tetrahydrofuran     | 7.58       | V      | -395.1038           | -395.1458         | 1.144                  |
|                        | Dichloroethane      | 10.36      | V      | -395.1058           | -395.1505         | 1.216                  |
|                        | Acetone             | 20.70      | V      | -395.1087           | -395.1570         | 1.314                  |
|                        | Ethanol             | 24.55      | V      | -395.1092           | -395.1581         | 1.330                  |
|                        | Dimethylsulfoxide   | 46.70      | V      | -395.1104           | -395.1607         | 1.369                  |
|                        | EAexperimental /eV  |            |        | -0.36               |                   |                        |
|                        | EALinear extrap./eV |            |        | -0.57               |                   |                        |
|                        | R <sup>2</sup>      |            |        | 0.9999              |                   |                        |

| Species                             | Media                | $\epsilon$ | type   | $E(\text{neutral})$ | $E(\text{anion})$ | AEA/ eV         |
|-------------------------------------|----------------------|------------|--------|---------------------|-------------------|-----------------|
| <b>Cytosine</b><br>(adiabatic)      | Argon                | 1.43       | V      | -395.0822           | -395.0970         | 0.511           |
|                                     | Krypton              | 1.52       | V      | -395.0833           | -395.1010         | 0.590           |
|                                     | Heptane              | 1.92       | V      | -395.0874           | -395.1148         | 0.854           |
|                                     | Ciclohexane          | 2.02       | V      | -395.0883           | -395.1176         | 0.906           |
|                                     | Benzene              | 2.25       | V      | -395.0900           | -395.1228         | 1.001           |
|                                     | Ethyl Ether          | 4.34       | V      | -395.0988           | -395.1468         | 1.416           |
|                                     | Chloroform           | 4.90       | V      | -395.1001           | -395.1500         | 1.468           |
|                                     | Chlorobenzene        | 5.62       | V      | -395.1013           | -395.1532         | 1.519           |
|                                     | Tetrahydrofuran      | 7.58       | V      | -395.1038           | -395.1589         | 1.608           |
|                                     | Dichloroethane       | 10.36      | V      | -395.1058           | -395.1635         | 1.678           |
|                                     | Acetone              | 20.70      | V      | -395.1087           | -395.1699         | 1.774           |
|                                     | Ethanol              | 24.55      | V      | -395.1092           | -395.1710         | 1.789           |
|                                     | Dimethylsulfoxide    | 46.70      | V      | -395.1104           | -395.1736         | 1.826           |
|                                     | EA experimental /eV  |            |        | -0.06               |                   |                 |
|                                     | EA Linear extrap./eV |            |        | -0.07               |                   |                 |
| R <sup>2</sup>                      |                      |            | 1.0000 |                     |                   |                 |
| Species                             | Media                | $\epsilon$ | type   | $E(\text{neutral})$ | $E(\text{anion})$ | AEA/ eV         |
| <b>Ethyl Radical</b><br>(adiabatic) | Argon                | 1.43       | V      | -79.1882            | -79.2054          | 0.508           |
|                                     | Krypton              | 1.52       | V      | -79.1882            | -79.2093          | 0.615           |
|                                     | Heptane              | 1.92       | V      | -79.1883            | -79.2227          | 0.977           |
|                                     | Benzene              | 2.25       | V      | -79.1884            | -79.2303          | 1.180           |
|                                     | Ethyl Ether          | 4.34       | V      | -79.1886            | -79.2521          | 1.768           |
|                                     | Chloroform           | 4.90       | V      | -79.1886            | -79.2549          | 1.843           |
|                                     | Chlorobenzene        | 5.62       | V      | -79.1887            | -79.2576          | 1.917           |
|                                     | Tetrahydrofuran      | 7.58       | V      | -79.1887            | -79.2625          | 2.049           |
|                                     | Dichloroethane       | 10.36      | V      | -79.1888            | -79.2663          | 2.151           |
|                                     | Acetone              | 20.70      | V      | -79.1888            | -79.2716          | 2.293           |
|                                     | Ethanol              | 24.55      | V      | -79.1888            | -79.2725          | 2.316           |
|                                     | Acetonitrile         | 36.64      | V      | -79.1889            | -79.2740          | 2.356           |
|                                     | Dimethylsulfoxide    | 46.70      | V      | -79.1889            | -79.2746          | 2.373           |
|                                     | Water                | 78.39      | V      | -79.1889            | -79.2756          | 2.400           |
|                                     | EA experimental /eV  |            |        | -0.26               |                   |                 |
| EA Linear extrap./eV                |                      |            | -0.34  |                     |                   |                 |
| R <sup>2</sup>                      |                      |            | 0.9997 |                     |                   |                 |
| Species                             | Media                | $\epsilon$ | type   | $E(\text{neutral})$ | $E(\text{anion})$ | $\Delta E / eV$ |
| <b>Ethylene</b>                     | Argon                | 1.43       | V      | -78.6195            | -78.5823          | -1.012          |
|                                     | Krypton              | 1.52       | V      | -78.6196            | -78.5859          | -0.916          |
|                                     | Heptane              | 1.92       | V      | -78.6198            | -78.5980          | -0.591          |
|                                     | Ciclohexane          | 2.02       | V      | -78.6198            | -78.6004          | -0.528          |
|                                     | Benzene              | 2.25       | V      | -78.6199            | -78.6048          | -0.410          |
|                                     | Ethyl Ether          | 4.34       | V      | -78.6204            | -78.6244          | 0.109           |
|                                     | Chloroform           | 4.90       | V      | -78.6204            | -78.6268          | 0.174           |
|                                     | Chlorobenzene        | 5.62       | V      | -78.6205            | -78.6293          | 0.238           |
|                                     | Tetrahydrofuran      | 7.58       | V      | -78.6206            | -78.6335          | 0.352           |
|                                     | Dichloroethane       | 10.36      | V      | -78.6207            | -78.6369          | 0.440           |
|                                     | Acetone              | 20.70      | V      | -78.6209            | -78.6414          | 0.560           |
|                                     | Ethanol              | 24.55      | V      | -78.6209            | -78.6422          | 0.579           |
|                                     | Acetonitrile         | 36.64      | V      | -78.6209            | -78.6434          | 0.613           |
|                                     | Dimethylsulfoxide    | 46.70      | V      | -78.6209            | -78.6440          | 0.627           |
|                                     | Water                | 78.39      | V      | -78.6210            | -78.6448          | 0.649           |
| EA experimental /eV                 |                      |            | -1.78  |                     |                   |                 |
| EA Linear extrap./eV                |                      |            | -1.75  |                     |                   |                 |
| R <sup>2</sup>                      |                      |            | 0.9999 |                     |                   |                 |

| Species                                 | Media               | $\epsilon$ | type    | $E(\text{neutral})$ | $E(\text{anion})$ | $\Delta E / \text{eV}$ |
|-----------------------------------------|---------------------|------------|---------|---------------------|-------------------|------------------------|
| <b>Isopropil radical</b><br>(adiabatic) | Argon               | 1.43       | V       | -118.520            | -118.533          | 0.437                  |
|                                         | Krypton             | 1.52       | V       | -118.517            | -118.537          | 0.627                  |
|                                         | Heptane             | 1.92       | V       | -118.520            | -118.549          | 0.872                  |
|                                         | Ciclohexane         | 2.02       | V       | -118.520            | -118.551          | 0.926                  |
|                                         | Benzene             | 2.25       | V       | -118.520            | -118.556          | 1.062                  |
|                                         | Ethyl Ether         | 4.34       | V       | -118.521            | -118.577          | 1.607                  |
|                                         | Chloroform          | 4.90       | V       | -118.521            | -118.580          | 1.688                  |
|                                         | Chlorobenzene       | 5.62       | V       | -118.521            | -118.582          | 1.743                  |
|                                         | Tetrahydrofuran     | 7.58       | V       | -118.518            | -118.587          | 1.960                  |
|                                         | Dichloroethane      | 10.36      | V       | -118.521            | -118.591          | 1.988                  |
|                                         | Acetone             | 20.70      | V       | -118.521            | -118.596          | 2.124                  |
|                                         | Ethanol             | 24.55      | V       | -118.521            | -118.597          | 2.151                  |
|                                         | Acetonitrile        | 36.64      | V       | -118.521            | -118.599          | 2.205                  |
|                                         | Dimethylsulfoxide   | 46.70      | V       | -118.521            | -118.599          | 2.205                  |
|                                         | Water               | 78.39      | V       | -118.521            | -118.600          | 2.233                  |
|                                         | EA experimental /eV |            |         | -0.32               |                   |                        |
|                                         | EALinear extrap./eV |            |         | -0.35               |                   |                        |
| R <sup>2</sup>                          |                     |            | -0.9965 |                     |                   |                        |

| Species            | Media               | $\epsilon$ | type | $E(\text{neutral})$ | $E(\text{anion})$ | $\Delta E / \text{eV}$ |
|--------------------|---------------------|------------|------|---------------------|-------------------|------------------------|
| <b>isothiazole</b> | Argon               | 1.43       | V    | -569.137            | -569.133          | -0.115                 |
|                    | Krypton             | 1.52       | V    | -569.137            | -569.137          | -0.024                 |
|                    | Heptane             | 1.92       | V    | -569.138            | -569.149          | 0.283                  |
|                    | Ciclohexane         | 2.02       | V    | -569.139            | -569.151          | 0.343                  |
|                    | Benzene             | 2.25       | V    | -569.139            | -569.156          | 0.454                  |
|                    | Ethyl Ether         | 4.34       | V    | -569.141            | -569.176          | 0.947                  |
|                    | Chloroform          | 4.90       | V    | -569.141            | -569.179          | 1.010                  |
|                    | Chlorobenzene       | 5.62       | V    | -569.142            | -569.181          | 1.071                  |
|                    | Tetrahydrofuran     | 7.58       | V    | -569.142            | -569.186          | 1.180                  |
|                    | Dichloroethane      | 10.36      | V    | -569.143            | -569.189          | 1.264                  |
|                    | Acetone             | 20.70      | V    | -569.144            | -569.194          | 1.381                  |
|                    | Ethanol             | 24.55      | V    | -569.144            | -569.195          | 1.399                  |
|                    | Acetonitrile        | 36.64      | V    | -569.144            | -569.197          | 1.432                  |
|                    | Dimethylsulfoxide   | 46.70      | V    | -569.144            | -569.197          | 1.446                  |
|                    | EA experimental /eV |            |      | -0.63               |                   |                        |
|                    | EALinear extrap./eV |            |      | -0.82               |                   |                        |
|                    | R <sup>2</sup>      |            |      | 0.9999              |                   |                        |

| Species          | Media               | $\epsilon$ | type   | $E(\text{neutral})$ | $E(\text{anion})$ | $\Delta E / \text{eV}$ |
|------------------|---------------------|------------|--------|---------------------|-------------------|------------------------|
| <b>Isoxazole</b> | Argon               | 1.43       | V      | -246.121            | -246.103          | -0.491                 |
|                  | Krypton             | 1.52       | V      | -246.121            | -246.107          | -0.397                 |
|                  | Heptane             | 1.92       | V      | -246.123            | -246.120          | -0.079                 |
|                  | Ciclohexane         | 2.02       | V      | -246.123            | -246.122          | -0.017                 |
|                  | Benzene             | 2.25       | V      | -246.123            | -246.127          | 0.099                  |
|                  | Ethyl Ether         | 4.34       | V      | -246.126            | -246.149          | 0.610                  |
|                  | Chloroform          | 4.90       | V      | -246.127            | -246.151          | 0.675                  |
|                  | Chlorobenzene       | 5.62       | V      | -246.127            | -246.154          | 0.739                  |
|                  | Tetrahydrofuran     | 7.58       | V      | -246.128            | -246.159          | 0.852                  |
|                  | Dichloroethane      | 10.36      | V      | -246.128            | -246.163          | 0.940                  |
|                  | Acetone             | 20.70      | V      | -246.129            | -246.168          | 1.061                  |
|                  | Ethanol             | 24.55      | V      | -246.129            | -246.169          | 1.081                  |
|                  | Acetonitrile        | 36.64      | V      | -246.130            | -246.171          | 1.115                  |
|                  | Dimethylsulfoxide   | 46.70      | V      | -246.130            | -246.171          | 1.129                  |
|                  | Water               | 78.39      | V      | -246.130            | -246.172          | 1.154                  |
|                  | EA experimental /eV |            |        | -1.09               |                   |                        |
|                  | EALinear extrap./eV |            |        | -1.22               |                   |                        |
| R <sup>2</sup>   |                     |            | 0.9998 |                     |                   |                        |

| Species        | Media                | $\epsilon$ | type   | $E(\text{neutral})$ | $E(\text{anion})$ | $\Delta E / \text{eV}$ |
|----------------|----------------------|------------|--------|---------------------|-------------------|------------------------|
| <b>Oxazole</b> | Argon                | 1.43       | V      | -246.1573           | -246.1290         | -0.770                 |
|                | Krypton              | 1.52       | V      | -246.1576           | -246.1325         | -0.683                 |
|                | Heptane              | 1.92       | V      | -246.1588           | -246.1446         | -0.386                 |
|                | Ciclohexane          | 2.02       | V      | -246.1590           | -246.1469         | -0.328                 |
|                | Benzene              | 2.25       | V      | -246.1595           | -246.1514         | -0.219                 |
|                | Ethyl Ether          | 4.34       | V      | -246.1619           | -246.1716         | 0.265                  |
|                | Chloroform           | 4.90       | V      | -246.1622           | -246.1742         | 0.326                  |
|                | Chlorobenzene        | 5.62       | V      | -246.1626           | -246.1768         | 0.387                  |
|                | Tetrahydrofuran      | 7.58       | V      | -246.1632           | -246.1814         | 0.495                  |
|                | Dichloroethane       | 10.36      | V      | -246.1638           | -246.1850         | 0.579                  |
|                | Acetone              | 20.70      | V      | -246.1645           | -246.1901         | 0.694                  |
|                | Ethanol              | 24.55      | V      | -246.1647           | -246.1909         | 0.712                  |
|                | Acetonitrile         | 36.64      | V      | -246.1649           | -246.1923         | 0.745                  |
|                | Dimethylsulfoxide    | 46.70      | V      | -246.1650           | -246.1929         | 0.759                  |
|                | EA experimental /eV  |            |        | -1.44               |                   |                        |
|                | EA Linear extrap./eV |            |        | -1.47               |                   |                        |
| R <sup>2</sup> |                      |            | 0.9997 |                     |                   |                        |

| Species                                | Media               | $\epsilon$ | type   | $E(\text{neutral})$ | $E(\text{anion})$ | AEA/eV |
|----------------------------------------|---------------------|------------|--------|---------------------|-------------------|--------|
| <b>t-Butyl radical<br/>(adiabatic)</b> | Argon               | 1.43       | V      | -157.8516           | -157.8669         | 0.417  |
|                                        | Krypton             | 1.52       | V      | -157.8516           | -157.8702         | 0.506  |
|                                        | Heptane             | 1.92       | V      | -157.8516           | -157.8813         | 0.808  |
|                                        | Ciclohexane         | 2.02       | V      | -157.8517           | -157.8838         | 0.872  |
|                                        | Benzene             | 2.25       | V      | -157.8517           | -157.8880         | 0.986  |
|                                        | Ethyl Ether         | 4.34       | V      | -157.8519           | -157.9069         | 1.497  |
|                                        | Chloroform          | 4.90       | V      | -157.8519           | -157.9092         | 1.558  |
|                                        | Chlorobenzene       | 5.62       | V      | -157.8519           | -157.9119         | 1.630  |
|                                        | Tetrahydrofuran     | 7.58       | V      | -157.8520           | -157.9163         | 1.751  |
|                                        | Dichloroethane      | 10.36      | V      | -157.8520           | -157.9199         | 1.847  |
|                                        | Acetone             | 20.70      | V      | -157.8523           | -157.9249         | 1.977  |
|                                        | Ethanol             | 24.55      | V      | -157.8521           | -157.9257         | 2.003  |
|                                        | Acetonitrile        | 36.64      | V      | -157.8521           | -157.9272         | 2.044  |
|                                        | Dimethylsulfoxide   | 46.70      | V      | -157.8521           | -157.9278         | 2.058  |
|                                        | Water               | 78.39      | V      | -157.8522           | -157.9290         | 2.091  |
|                                        | EA experimental /eV |            |        | -0.16               |                   |        |
| EA Linear extrap./eV                   |                     |            | -0.27  |                     |                   |        |
| R <sup>2</sup>                         |                     |            | 0.9987 |                     |                   |        |

| Species         | Media                | $\epsilon$ | type   | $E(\text{neutral})$ | $E(\text{anion})$ | $\Delta E / \text{eV}$ |
|-----------------|----------------------|------------|--------|---------------------|-------------------|------------------------|
| <b>Thiazole</b> | Argon                | 1.43       | V      | -569.1403           | -569.1313         | -0.246                 |
|                 | Krypton              | 1.52       | V      | -569.1406           | -569.1349         | -0.155                 |
|                 | Heptane              | 1.92       | V      | -569.1416           | -569.1473         | 0.153                  |
|                 | Ciclohexane          | 2.02       | V      | -569.1419           | -569.1497         | 0.213                  |
|                 | Benzene              | 2.25       | V      | -569.1423           | -569.1542         | 0.324                  |
|                 | Ether                | 4.34       | V      | -569.1445           | -569.1745         | 0.815                  |
|                 | Chloroform           | 4.90       | V      | -569.1449           | -569.1771         | 0.877                  |
|                 | Dichloroethane       | 5.62       | V      | -569.1452           | -569.1796         | 0.937                  |
|                 | THF                  | 7.58       | V      | -569.1458           | -569.1842         | 1.046                  |
|                 | Chlorobenzene        | 10.36      | V      | -569.1463           | -569.1878         | 1.129                  |
|                 | Acetone              | 20.70      | V      | -569.1471           | -569.1928         | 1.244                  |
|                 | Ethanol              | 24.55      | V      | -569.1472           | -569.1936         | 1.263                  |
|                 | Acetonitrile         | 36.64      | V      | -569.1474           | -569.1950         | 1.295                  |
|                 | DMSO                 | 46.70      | V      | -569.1475           | -569.1956         | 1.309                  |
|                 | EA experimental /eV  |            |        | -0.800              |                   |                        |
|                 | EA Linear extrap./eV |            |        | -0.94               |                   |                        |
| R <sup>2</sup>  |                      |            | 0.9999 |                     |                   |                        |

| Species          | Media                | $\epsilon$ | type   | $E(\text{neutral})$ | $E(\text{anion})$ | $\Delta E / \text{eV}$ |
|------------------|----------------------|------------|--------|---------------------|-------------------|------------------------|
| <b>Thiophene</b> | Argon                | 1.43       | V      | -553.0906           | -553.0686         | -0.600                 |
|                  | Krypton              | 1.52       | V      | -553.0908           | -553.0720         | -0.511                 |
|                  | Heptane              | 1.92       | V      | -553.0915           | -553.0838         | -0.210                 |
|                  | Ciclohexane          | 2.02       | V      | -553.0916           | -553.0861         | -0.151                 |
|                  | Benzene              | 2.25       | V      | -553.0919           | -553.0904         | -0.042                 |
|                  | Ethyl                | 4.34       | V      | -553.0934           | -553.1097         | 0.442                  |
|                  | Chloroform           | 4.90       | V      | -553.0937           | -553.1121         | 0.503                  |
|                  | Chlorobenzene        | 5.62       | V      | -553.0939           | -553.1146         | 0.563                  |
|                  | Tetrahydrofuran      | 7.58       | V      | -553.0943           | -553.1190         | 0.671                  |
|                  | Dichloroethane       | 10.36      | V      | -553.0947           | -553.1224         | 0.754                  |
|                  | Acetone              | 20.70      | V      | -553.0952           | -553.1271         | 0.868                  |
|                  | Ethanol              | 24.55      | V      | -553.0953           | -553.1279         | 0.887                  |
|                  | Acetonitrile         | 36.64      | V      | -553.0954           | -553.1292         | 0.919                  |
|                  | Dimethylsulfoxide    | 46.70      | V      | -553.0955           | -553.1298         | 0.933                  |
|                  | Water                | 78.39      | V      | -553.0956           | -553.1308         | 0.956                  |
|                  | EA experimental /eV  |            |        | -1.17               |                   |                        |
|                  | EA Linear extrap./eV |            |        | -1.29               |                   |                        |
| R <sup>2</sup>   |                      |            | 0.9998 |                     |                   |                        |

| Species        | Media                | $\epsilon$ | type | $E(\text{neutral})$ | $E(\text{anion})$ | $\Delta E / \text{eV}$ |
|----------------|----------------------|------------|------|---------------------|-------------------|------------------------|
| <b>Thymine</b> | Argon                | 1.43       | V    | -454.3060           | -454.3148         | 0.239                  |
|                | Krypton              | 1.52       | V    | -454.3069           | -454.3184         | 0.313                  |
|                | Heptane              | 1.92       | V    | -454.3102           | -454.3308         | 0.562                  |
|                | Ciclohexane          | 2.02       | V    | -454.3109           | -454.3334         | 0.611                  |
|                | Benzene              | 2.25       | V    | -454.3124           | -454.3381         | 0.700                  |
|                | Ethyl Ether          | 4.34       | V    | -454.3194           | -454.3596         | 1.093                  |
|                | Chloroform           | 4.90       | V    | -454.3206           | -454.3626         | 1.143                  |
|                | Chlorobenzene        | 5.62       | V    | -454.3215           | -454.3653         | 1.191                  |
|                | Tetrahydrofuran      | 7.58       | V    | -454.3235           | -454.3704         | 1.276                  |
|                | Dichloroethane       | 10.36      | V    | -454.3251           | -454.3745         | 1.343                  |
|                | Acetone              | 20.70      | V    | -454.3275           | -454.3802         | 1.434                  |
|                | Ethanol              | 24.55      | V    | -454.3279           | -454.3812         | 1.449                  |
|                | Dimethylsulfoxide    | 46.70      | V    | -454.3288           | -454.3833         | 1.485                  |
|                | Water                | 78.39      | V    | -454.3295           | -454.3849         | 1.466                  |
|                | EA experimental /eV  |            |      | -0.31               |                   |                        |
|                | EA Linear extrap./eV |            |      | -0.34               |                   |                        |
|                | R <sup>2</sup>       |            |      | 0.9997              |                   |                        |

| Species                       | Media                | $\epsilon$ | type | $E(\text{neutral})$ | $E(\text{anion})$ | $\Delta E / \text{eV}$ |
|-------------------------------|----------------------|------------|------|---------------------|-------------------|------------------------|
| <b>trans-1-bromo-2-butene</b> | Argon                | 1.43       | V    | -2730.8259          | -2730.8262        | 0.008                  |
|                               | Krypton              | 1.52       | V    | -2730.8261          | -2730.8293        | 0.089                  |
|                               | Heptane              | 1.92       | V    | -2730.8268          | -2730.8401        | 0.363                  |
|                               | Ciclohexane          | 2.02       | V    | -2730.8269          | -2730.8422        | 0.417                  |
|                               | Benzene              | 2.25       | V    | -2730.8272          | -2730.8462        | 0.518                  |
|                               | Ether                | 4.34       | V    | -2730.8286          | -2730.8643        | 0.971                  |
|                               | Chloroform           | 4.90       | V    | -2730.8289          | -2730.8667        | 1.029                  |
|                               | Dichloroethane       | 5.62       | V    | -2730.8291          | -2730.8690        | 1.086                  |
|                               | THF                  | 7.58       | V    | -2730.8295          | -2730.8732        | 1.189                  |
|                               | Chlorobenzene        | 10.36      | V    | -2730.8298          | -2730.8765        | 1.270                  |
|                               | Dichloromethane      | 20.70      | V    | -2730.8303          | -2730.8810        | 1.381                  |
|                               | Acetone              | 24.55      | V    | -2730.8304          | -2730.8818        | 1.400                  |
|                               | DMSO                 | 46.70      | V    | -2730.8306          | -2730.8836        | 1.444                  |
|                               | Water                | 78.39      | V    | -2730.8307          | -2730.8847        | 1.469                  |
|                               | EA experimental /eV  |            |      | -0.68               |                   |                        |
|                               | EA Linear extrap./eV |            |      | -0.65               |                   |                        |
|                               | R <sup>2</sup>       |            |      | 0.9994              |                   |                        |

| Species                           | Media                | $\epsilon$ | type   | $E(\text{neutral})$ | $E(\text{anion})$ | $\Delta E / \text{eV}$ |
|-----------------------------------|----------------------|------------|--------|---------------------|-------------------|------------------------|
| <b>trans-1,2-dichloroethylene</b> | Argon                | 1.43       | V      | -997.8732           | -997.8600         | -0.358                 |
|                                   | Krypton              | 1.52       | V      | -997.8733           | -997.8634         | -0.272                 |
|                                   | Heptane              | 1.92       | V      | -997.8739           | -997.8746         | 0.019                  |
|                                   | Ciclohexane          | 2.02       | V      | -997.8740           | -997.8768         | 0.075                  |
|                                   | Benzene              | 2.25       | V      | -997.8743           | -997.8809         | 0.180                  |
|                                   | Ethyl Ether          | 4.34       | V      | -997.8754           | -997.8990         | 0.642                  |
|                                   | Chloroform           | 4.90       | V      | -997.8756           | -997.9013         | 0.700                  |
|                                   | Chlorobenzene        | 5.62       | V      | -997.8758           | -997.9036         | 0.757                  |
|                                   | Tetrahydrofuran      | 7.58       | V      | -997.8761           | -997.9076         | 0.857                  |
|                                   | Dichloroethane       | 10.36      | V      | -997.8764           | -997.9107         | 0.935                  |
|                                   | Acetone              | 20.70      | V      | -997.8767           | -997.9150         | 1.042                  |
|                                   | Ethanol              | 24.55      | V      | -997.8768           | -997.9157         | 1.058                  |
|                                   | Acetonitrile         | 36.64      | V      | -997.8769           | -997.9169         | 1.088                  |
|                                   | Dimethylsulfoxide    | 46.70      | V      | -997.8770           | -997.9174         | 1.101                  |
|                                   | Water                | 78.39      | V      | -997.8770           | -997.9183         | 1.122                  |
|                                   | EA experimental /eV  |            |        | -0.82               |                   |                        |
|                                   | EA Linear extrap./eV |            |        | -1.01               |                   |                        |
| $R^2$                             |                      |            | 0.9999 |                     |                   |                        |
| Species                           | Media                | $\epsilon$ | type   | $E(\text{neutral})$ | $E(\text{anion})$ | $\Delta E / \text{eV}$ |
| <b>Uracil</b>                     | Argon                | 1.43       | V      | -414.9754           | -414.9863         | 0.299                  |
|                                   | Krypton              | 1.52       | V      | -414.9764           | -414.9902         | 0.377                  |
|                                   | Heptane              | 1.92       | V      | -414.9800           | -415.0034         | 0.639                  |
|                                   | Ciclohexane          | 2.02       | V      | -414.9808           | -415.0061         | 0.689                  |
|                                   | Benzene              | 2.25       | V      | -414.9823           | -415.0111         | 0.782                  |
|                                   | Ethyl Ether          | 4.34       | V      | -414.9900           | -415.0337         | 1.188                  |
|                                   | Chloroform           | 4.90       | V      | -414.9911           | -415.0366         | 1.238                  |
|                                   | Chlorobenzene        | 5.62       | V      | -414.9922           | -415.0395         | 1.288                  |
|                                   | Tetrahydrofuran      | 7.58       | V      | -414.9943           | -415.0448         | 1.375                  |
|                                   | Dichloroethane       | 10.36      | V      | -414.9960           | -415.0490         | 1.442                  |
|                                   | Acetone              | 20.70      | V      | -414.9984           | -415.0548         | 1.534                  |
|                                   | Ethanol              | 24.55      | V      | -414.9988           | -415.0557         | 1.548                  |
|                                   | Dimethylsulfoxide    | 46.70      | V      | -414.9998           | -415.0581         | 1.585                  |
|                                   | Water                | 78.39      | V      | -415.0004           | -415.0594         | 1.569                  |
|                                   | EA experimental /eV  |            |        | -0.27               |                   |                        |
|                                   | EA Linear extrap./eV |            |        | -0.27               |                   |                        |
|                                   | $R^2$                |            |        | 1.0000              |                   |                        |
| Species                           | Media                | $\epsilon$ | type   | $E(\text{neutral})$ | $E(\text{anion})$ | AEA/eV                 |
| <b>Uracil (adiabatic)</b>         | Argon                | 1.43       | V      | -414.9754           | -414.9985         | 0.747                  |
|                                   | Krypton              | 1.52       | V      | -414.9764           | -415.0024         | 0.826                  |
|                                   | Heptane              | 1.92       | V      | -414.9800           | -415.0156         | 1.086                  |
|                                   | Ciclohexane          | 2.02       | V      | -414.9808           | -415.0182         | 1.136                  |
|                                   | Benzene              | 2.25       | V      | -414.9823           | -415.0232         | 1.231                  |
|                                   | Ethyl Ether          | 4.34       | V      | -414.9900           | -415.0457         | 1.634                  |
|                                   | Chloroform           | 4.90       | V      | -414.9911           | -415.0487         | 1.685                  |
|                                   | Chlorobenzene        | 5.62       | V      | -414.9922           | -415.0515         | 1.733                  |
|                                   | Tetrahydrofuran      | 7.58       | V      | -414.9943           | -415.0568         | 1.820                  |
|                                   | Dichloroethane       | 10.36      | V      | -414.9960           | -415.0610         | 1.886                  |
|                                   | Acetone              | 20.70      | V      | -414.9984           | -415.0667         | 1.978                  |
|                                   | Ethanol              | 24.55      | V      | -414.9988           | -415.0678         | 1.997                  |
|                                   | Acetonitrile         | 36.64      | V      | -414.9998           | -415.0695         | 2.014                  |
|                                   | Dimethylsulfoxide    | 46.70      | V      | -414.9998           | -415.0719         | 2.081                  |
|                                   | Water                | 78.39      | V      | -415.0004           | -415.0733         | 2.103                  |
|                                   | EA experimental /eV  |            |        | 0.17                |                   |                        |
|                                   | EA Linear extrap./eV |            |        | 0.16                |                   |                        |
| $R^2$                             |                      |            | 0.9985 |                     |                   |                        |

### 3.4. Table S4. $\Delta E$ vs $(1/\epsilon)$ extrapolation details for the N anions on Table 2

| Species                   | Media                | $\epsilon$ | type   | $E(\text{neutral})$ | $E(\text{anion})$ | $\Delta E / \text{eV}$ |
|---------------------------|----------------------|------------|--------|---------------------|-------------------|------------------------|
| <b>1,4-cyclohexadiene</b> | Argon                | 1.43       | N      | -233.4959           | -233.4714         | -0.6675                |
|                           | Krypton              | 1.52       | N      | -233.4960           | -233.4737         | -0.6080                |
|                           | Heptane              | 1.92       | V      | -233.4965           | -233.4668         | -0.8079                |
|                           | Ciclohexane          | 2.02       | V      | -233.4966           | -233.4688         | -0.7574                |
|                           | Benzene              | 2.25       | V      | -233.4968           | -233.4728         | -0.6554                |
|                           | Ether                | 4.34       | V      | -233.4979           | -233.4904         | -0.2043                |
|                           | Chloroform           | 4.9        | V      | -233.4981           | -233.4927         | -0.1470                |
|                           | Dichloroethane       | 5.62       | V      | -233.4982           | -233.4949         | -0.0909                |
|                           | THF                  | 7.58       | V      | -233.4986           | -233.4989         | 0.0093                 |
|                           | Chlorobenzene        | 10.36      | V      | -233.4988           | -233.5020         | 0.0870                 |
|                           | Acetone              | 20.7       | V      | -233.4992           | -233.5063         | 0.1939                 |
|                           | Ethanol              | 24.55      | V      | -233.4993           | -233.5070         | 0.2111                 |
|                           | Acetonitrile         | 36.64      | V      | -233.4994           | -233.5082         | 0.2412                 |
|                           | DMSO                 | 46.7       | V      | -233.4994           | -233.5088         | 0.2540                 |
|                           | EA experimental./eV  |            |        | -1.75               |                   |                        |
|                           | EA Linear extrap./eV |            |        | -1.84               |                   |                        |
|                           | R <sup>2</sup>       |            |        | 0.9996              |                   |                        |
| Species                   | Media                | $\epsilon$ | type   | $E(\text{neutral})$ | $E(\text{anion})$ | $\Delta E / \text{eV}$ |
| <b>2-methyl-2-butene</b>  | Argon                | 1.43       | N      | -196.6070           | -196.5827         | -0.662                 |
|                           | Krypton              | 1.52       | N      | -196.6071           | -196.5851         | -0.599                 |
|                           | Heptane              | 1.92       | N      | -196.6072           | -196.5931         | -0.385                 |
|                           | Ciclohexane          | 2.02       | N      | -196.6073           | -196.5947         | -0.343                 |
|                           | Benzene              | 2.25       | N      | -196.6073           | -196.5976         | -0.265                 |
|                           | Ethyl Ether          | 4.34       | N      | -196.6077           | -196.6112         | 0.096                  |
|                           | Chloroform           | 4.90       | N      | -196.6078           | -196.6131         | 0.145                  |
|                           | Chlorobenzene        | 5.62       | V      | -196.6078           | -196.5984         | -0.256                 |
|                           | Tetrahydrofuran      | 7.58       | V      | -196.6079           | -196.6022         | -0.157                 |
|                           | Dichloroethane       | 10.36      | V      | -196.6080           | -196.6051         | -0.080                 |
|                           | Acetone              | 20.70      | V      | -196.6082           | -196.6093         | 0.030                  |
|                           | Ethanol              | 24.55      | V      | -196.6082           | -196.6100         | 0.048                  |
|                           | Acetonitrile         | 36.64      | V      | -196.6082           | -196.6112         | 0.080                  |
|                           | Dimethylsulfoxide    | 46.70      | V      | -196.6083           | -196.6117         | 0.093                  |
|                           | Water                | 78.39      | V      | -196.6083           | -196.6126         | 0.117                  |
|                           | EA experimental./eV  |            |        | -2.24               |                   |                        |
|                           | EA Linear extrap./eV |            |        | -2.11               |                   |                        |
| R <sup>2</sup>            |                      |            | 0.9996 |                     |                   |                        |
| Species                   | Media                | $\epsilon$ | type   | $E(\text{neutral})$ | $E(\text{anion})$ | $\Delta E / \text{eV}$ |
| <b>acetic acid</b>        | Argon                | 1.43       | N      | -229.1785           | -229.1587         | -0.539                 |
|                           | Krypton              | 1.52       | V      | -229.1790           | -229.1616         | -0.473                 |
|                           | Heptane              | 1.92       | V      | -229.1807           | -229.1715         | -0.251                 |
|                           | Ciclohexane          | 2.02       | V      | -229.1811           | -229.1511         | -0.815                 |
|                           | Benzene              | 2.25       | V      | -229.1818           | -229.1561         | -0.700                 |
|                           | Ethyl Ether          | 4.34       | V      | -229.1855           | -229.1790         | -0.175                 |
|                           | Chloroform           | 4.9        | V      | -229.1860           | -229.1821         | -0.105                 |
|                           | Chlorobenzene        | 5.62       | V      | -229.1865           | -229.1851         | -0.039                 |
|                           | Tetrahydrofuran      | 7.58       | V      | -229.1875           | -229.1905         | 0.082                  |
|                           | Dichloroethane       | 10.36      | V      | -229.1883           | -229.1948         | 0.176                  |
|                           | Acetone              | 20.7       | V      | -229.1895           | -229.2007         | 0.306                  |
|                           | Ethanol              | 24.55      | V      | -229.1897           | -229.2017         | 0.327                  |
|                           | Acetonitrile         | 36.64      | V      | -229.1900           | -229.2034         | 0.364                  |
|                           | Dimethylsulfoxide    | 45.6       | V      | -229.1902           | -229.2041         | 0.378                  |
|                           | Water                | 78.39      | V      | -229.1904           | -229.2054         | 0.407                  |
|                           | EA experimental./eV  |            |        | -1.80               |                   |                        |
|                           | EA Linear extrap./eV |            |        | -2.15               |                   |                        |
| R <sup>2</sup>            |                      |            | 0.9996 |                     |                   |                        |



| Species          | Media                | $\epsilon$ | type   | $E(\text{neutral})$ | $E(\text{anion})$ | $\Delta E / \text{eV}$ |
|------------------|----------------------|------------|--------|---------------------|-------------------|------------------------|
| <b>Acetone</b>   | Argon                | 1.43       | V      | -193.2283           | -193.2027         | -0.696                 |
|                  | Krypton              | 1.52       | V      | -193.2285           | -193.2062         | -0.608                 |
|                  | Heptane              | 1.92       | V      | -193.2294           | -193.2182         | -0.304                 |
|                  | Ciclohexane          | 2.02       | V      | -193.2296           | -193.2207         | -0.243                 |
|                  | Benzene              | 2.25       | V      | -193.2300           | -193.2252         | -0.129                 |
|                  | Ethyl Ether          | 4.34       | V      | -193.2318           | -193.2461         | 0.387                  |
|                  | Chloroform           | 4.90       | V      | -193.2321           | -193.2489         | 0.456                  |
|                  | Chlorobenzene        | 5.62       | V      | -193.2324           | -193.2515         | 0.521                  |
|                  | Tetrahydrofuran      | 7.58       | V      | -193.2329           | -193.2565         | 0.641                  |
|                  | Dichloroethane       | 10.36      | V      | -193.2333           | -193.2603         | 0.734                  |
|                  | Acetone              | 20.70      | V      | -193.2340           | -193.2658         | 0.865                  |
|                  | Ethanol              | 24.55      | V      | -193.2341           | -193.2667         | 0.889                  |
|                  | Acetonitrile         | 36.64      | V      | -193.2343           | -193.2683         | 0.926                  |
|                  | Dimethylsulfoxide    | 46.70      | V      | -193.2343           | -193.2688         | 0.938                  |
|                  | Water                | 78.39      | V      | -193.2345           | -193.2704         | 0.975                  |
|                  | EA experimental /eV  |            | -1.51  |                     |                   |                        |
|                  | EA Linear extrap./eV |            | -1.46  |                     |                   |                        |
|                  | $R^2$                |            | 0.9988 |                     |                   |                        |
| Species          | Media                | $\epsilon$ | type   | $E(\text{neutral})$ | $E(\text{anion})$ | $\Delta E / \text{eV}$ |
| <b>Acetylene</b> | Argon                | 1.43       | N      | -77.3616            | -77.3062          | -1.509                 |
|                  | Krypton              | 1.52       | N      | -77.3618            | -77.3094          | -1.426                 |
|                  | Heptane              | 1.92       | N      | -77.3626            | -77.3209          | -1.135                 |
|                  | Ciclohexane          | 2.02       | V      | -77.3628            | -77.3232          | -1.078                 |
|                  | Benzene              | 2.25       | V      | -77.3631            | -77.3276          | -0.967                 |
|                  | Ethyl Ether          | 4.34       | V      | -77.3648            | -77.3483          | -0.447                 |
|                  | Chloroform           | 4.90       | V      | -77.3650            | -77.3511          | -0.378                 |
|                  | Chlorobenzene        | 5.62       | V      | -77.3652            | -77.3539          | -0.309                 |
|                  | Tetrahydrofuran      | 7.58       | V      | -77.3657            | -77.3589          | -0.185                 |
|                  | Dichloroethane       | 10.36      | V      | -77.3660            | -77.3628          | -0.087                 |
|                  | Acetone              | 20.70      | V      | -77.3665            | -77.3683          | 0.049                  |
|                  | Ethanol              | 24.55      | V      | -77.3666            | -77.3692          | 0.071                  |
|                  | Acetonitrile         | 36.64      | V      | -77.3668            | -77.3708          | 0.109                  |
|                  | Dimethylsulfoxide    | 46.70      | V      | -77.3668            | -77.3715          | 0.127                  |
|                  | Water                | 78.39      | V      | -77.3669            | -77.3724          | 0.150                  |
|                  | EA experimental /eV  |            | -2.60  |                     |                   |                        |
|                  | EA Linear extrap./eV |            | -2.40  |                     |                   |                        |
|                  | $R^2$                |            | 0.9984 |                     |                   |                        |
| Species          | Media                | $\epsilon$ | type   | $E(\text{neutral})$ | $E(\text{anion})$ | $\Delta E / \text{eV}$ |
| <b>Allene</b>    | Argon                | 1.43       | V      | -116.7023           | -116.6671         | -0.957                 |
|                  | Krypton              | 1.52       | V      | -116.7023           | -116.6701         | -0.876                 |
|                  | Heptane              | 1.92       | V      | -116.7026           | -116.6806         | -0.601                 |
|                  | Ciclohexane          | 2.02       | V      | -116.7027           | -116.6826         | -0.547                 |
|                  | Benzene              | 2.25       | V      | -116.7028           | -116.6864         | -0.446                 |
|                  | Ethyl Ether          | 4.34       | V      | -116.7035           | -116.7035         | 0.000                  |
|                  | Chloroform           | 4.90       | V      | -116.7036           | -116.7057         | 0.058                  |
|                  | Chlorobenzene        | 5.62       | V      | -116.7037           | -116.7078         | 0.113                  |
|                  | Tetrahydrofuran      | 7.58       | V      | -116.7039           | -116.7117         | 0.212                  |
|                  | Dichloroethane       | 10.36      | V      | -116.7040           | -116.7146         | 0.289                  |
|                  | Acetone              | 20.70      | V      | -116.7042           | -116.7187         | 0.394                  |
|                  | Ethanol              | 24.55      | V      | -116.7043           | -116.7194         | 0.411                  |
|                  | Acetonitrile         | 36.64      | V      | -116.7043           | -116.7205         | 0.441                  |
|                  | Dimethylsulfoxide    | 46.70      | V      | -116.7043           | -116.7210         | 0.453                  |
|                  | Water                | 78.39      | V      | -116.7044           | -116.7219         | 0.476                  |
|                  | EA experimental /eV  |            | -1.88  |                     |                   |                        |
|                  | EA Linear extrap./eV |            | -1.60  |                     |                   |                        |
|                  | $R^2$                |            | 0.9998 |                     |                   |                        |

| Species                         | Media                | $\epsilon$ | type   | $E(\text{neutral})$ | $E(\text{anion})$ | $\Delta E / \text{eV}$ |
|---------------------------------|----------------------|------------|--------|---------------------|-------------------|------------------------|
| <b>Butyrolactone</b>            | Argon                | 1.43       | N      | -267.2526           | -267.2319         | -0.562                 |
|                                 | Krypton              | 1.52       | N      | -267.2530           | -267.2346         | -0.500                 |
|                                 | Heptane              | 1.92       | N      | -267.2544           | -267.2438         | -0.289                 |
|                                 | Ciclohexane          | 2.02       | V      | -267.2547           | -267.2311         | -0.643                 |
|                                 | Benzene              | 2.25       | V      | -267.2553           | -267.2354         | -0.543                 |
|                                 | Ethyl Ether          | 4.34       | V      | -267.2582           | -267.2564         | -0.050                 |
|                                 | Chloroform           | 4.90       | V      | -267.2586           | -267.2593         | 0.018                  |
|                                 | Chlorobenzene        | 5.62       | V      | -267.2590           | -267.2622         | 0.087                  |
|                                 | Tetrahydrofuran      | 7.58       | V      | -267.2598           | -267.2675         | 0.210                  |
|                                 | Dichloroethane       | 10.36      | V      | -267.2605           | -267.2718         | 0.308                  |
|                                 | Acetone              | 20.70      | V      | -267.2614           | -267.2777         | 0.444                  |
|                                 | Ethanol              | 24.55      | V      | -267.2615           | -267.2786         | 0.466                  |
|                                 | Acetonitrile         | 36.64      | V      | -267.2618           | -267.2803         | 0.505                  |
|                                 | Dimethylsulfoxide    | 46.70      | V      | -267.2619           | -267.2811         | 0.522                  |
|                                 | Water                | 78.39      | V      | -267.2621           | -267.2822         | 0.548                  |
|                                 | EA experimental /eV  |            |        | -1.93               |                   |                        |
|                                 | EA Linear extrap./eV |            |        | -1.93               |                   |                        |
| R <sup>2</sup>                  |                      |            | 0.9969 |                     |                   |                        |
| Species                         | Media                | $\epsilon$ | type   | $E(\text{neutral})$ | $E(\text{anion})$ | $\Delta E / \text{eV}$ |
| <b>cis-1-bromo-1-propene</b>    | Argon                | 1.43       | V      | -2691.4980          | -2691.4568        | -1.120                 |
|                                 | Krypton              | 1.52       | V      | -2691.4980          | -2691.4601        | -1.032                 |
|                                 | Heptane              | 1.92       | V      | -2691.4979          | -2691.4710        | -0.731                 |
|                                 | Ciclohexane          | 2.02       | V      | -2691.4978          | -2691.4732        | -0.668                 |
|                                 | Benzene              | 2.25       | V      | -2691.4977          | -2691.4772        | -0.557                 |
|                                 | Ethyl Ether          | 4.34       | V      | -2691.4974          | -2691.4953        | -0.056                 |
|                                 | Chloroform           | 4.90       | V      | -2691.4971          | -2691.4976        | 0.014                  |
|                                 | Chlorobenzene        | 5.62       | V      | -2691.4969          | -2691.4999        | 0.083                  |
|                                 | Tetrahydrofuran      | 7.58       | V      | -2691.4967          | -2691.5040        | 0.198                  |
|                                 | Dichloroethane       | 10.36      | V      | -2691.4966          | -2691.5072        | 0.289                  |
|                                 | Acetone              | 20.70      | V      | -2691.4956          | -2691.5116        | 0.435                  |
|                                 | Ethanol              | 24.55      | V      | -2691.4954          | -2691.5123        | 0.460                  |
|                                 | Acetonitrile         | 36.64      | V      | -2691.4953          | -2691.5135        | 0.497                  |
|                                 | Dimethylsulfoxide    | 46.70      | V      | -2691.4948          | -2691.5140        | 0.523                  |
|                                 | Water                | 78.39      | V      | -2691.4947          | -2691.5150        | 0.553                  |
|                                 | EA experimental /eV  |            |        | -1.49               |                   |                        |
|                                 | EA Linear extrap./eV |            |        | -1.88               |                   |                        |
| R <sup>2</sup>                  |                      |            | 0.9979 |                     |                   |                        |
| Species                         | Media                | $\epsilon$ | type   | $E(\text{neutral})$ | $E(\text{anion})$ | $\Delta E / \text{eV}$ |
| <b>cis 1,2-difluor-ethylene</b> | Argon                | 1.43       | N      | -277.1577           | -277.1339         | -0.65                  |
|                                 | Krypton              | 1.52       | V      | -277.1579           | -277.1123         | -1.24                  |
|                                 | Heptane              | 1.92       | V      | -277.1587           | -277.1241         | -0.94                  |
|                                 | Ciclohexane          | 2.02       | V      | -277.1589           | -277.1265         | -0.88                  |
|                                 | Benzene              | 2.25       | V      | -277.1592           | -277.1308         | -0.77                  |
|                                 | Ethyl Ether          | 4.34       | V      | -277.1610           | -277.1502         | -0.29                  |
|                                 | Chloroform           | 4.9        | V      | -277.1612           | -277.1527         | -0.23                  |
|                                 | Chlorobenzene        | 5.62       | V      | -277.1615           | -277.1551         | -0.17                  |
|                                 | Tetrahydrofuran      | 7.58       | V      | -277.1619           | -277.1595         | -0.07                  |
|                                 | Dichloroethane       | 10.36      | V      | -277.1623           | -277.1628         | 0.01                   |
|                                 | Acetone              | 20.7       | V      | -277.1629           | -277.1675         | 0.13                   |
|                                 | Ethanol              | 24.55      | V      | -277.1630           | -277.1682         | 0.14                   |
|                                 | Acetonitrile         | 36.64      | V      | -277.1631           | -277.1695         | 0.17                   |
|                                 | Dimethylsulfoxide    | 46.7       | V      | -277.1632           | -277.1701         | 0.19                   |
|                                 | Water                | 78.39      | V      | -277.1633           | -277.1711         | 0.21                   |
|                                 | EA experimental /eV  |            |        | -2.18               |                   |                        |
|                                 | EA Linear extrap./eV |            |        | -2.02               |                   |                        |
| R <sup>2</sup>                  |                      |            | 0.9999 |                     |                   |                        |

| Species             | Media                | $\epsilon$ | type     | $E(\text{neutral})$ | $E(\text{anion})$ | $\Delta E / \text{eV}$ |
|---------------------|----------------------|------------|----------|---------------------|-------------------|------------------------|
| <b>cis-2-butene</b> | Argon                | 1.43       | <i>N</i> | -157.2782           | -157.2521         | -0.711                 |
|                     | Krypton              | 1.52       | <i>N</i> | -157.2783           | -157.2546         | -0.645                 |
|                     | Heptane              | 1.92       | <i>N</i> | -157.2785           | -157.2631         | -0.419                 |
|                     | Ciclohexane          | 2.02       | <i>N</i> | -157.2786           | -157.2648         | -0.376                 |
|                     | Benzene              | 2.25       | <i>N</i> | -157.2787           | -157.2679         | -0.294                 |
|                     | Ethyl Ether          | 4.34       | <i>V</i> | -157.2792           | -157.2610         | -0.494                 |
|                     | Chloroform           | 4.90       | <i>V</i> | -157.2793           | -157.2634         | -0.431                 |
|                     | Chlorobenzene        | 5.62       | <i>V</i> | -157.2793           | -157.2658         | -0.369                 |
|                     | Tetrahydrofuran      | 7.58       | <i>V</i> | -157.2795           | -157.2700         | -0.258                 |
|                     | Dichloroethane       | 10.36      | <i>V</i> | -157.2796           | -157.2733         | -0.172                 |
|                     | Acetone              | 20.70      | <i>V</i> | -157.2798           | -157.2779         | -0.052                 |
|                     | Ethanol              | 24.55      | <i>V</i> | -157.2798           | -157.2787         | -0.032                 |
|                     | Acetonitrile         | 36.64      | <i>V</i> | -157.2799           | -157.2800         | 0.002                  |
|                     | Dimethylsulfoxide    | 46.70      | <i>V</i> | -157.2799           | -157.2815         | 0.044                  |
|                     | Water                | 78.39      | <i>V</i> | -157.2800           | -157.2815         | 0.042                  |
|                     | EA experimental /eV  |            |          | -2.22               |                   |                        |
|                     | EA Linear extrap./eV |            |          | -2.42               |                   |                        |
| $R^2$               |                      |            | 0.9983   |                     |                   |                        |
| Species             | Media                | $\epsilon$ | type     | $E(\text{neutral})$ | $E(\text{anion})$ | $\Delta E / \text{eV}$ |
| <b>Cyclobutene</b>  | Argon                | 1.43       | <i>N</i> | -156.0249           | -155.9895         | -0.964                 |
|                     | Krypton              | 1.52       | <i>N</i> | -156.0250           | -155.9919         | -0.900                 |
|                     | Heptane              | 1.92       | <i>V</i> | -156.0253           | -155.9896         | -0.971                 |
|                     | Ciclohexane          | 2.02       | <i>V</i> | -156.0253           | -155.9918         | -0.911                 |
|                     | Benzene              | 2.25       | <i>V</i> | -156.0254           | -155.9961         | -0.799                 |
|                     | Ethyl Ether          | 4.34       | <i>V</i> | -156.0261           | -156.0151         | -0.297                 |
|                     | Chloroform           | 4.90       | <i>V</i> | -156.0262           | -156.0176         | -0.233                 |
|                     | Chlorobenzene        | 5.62       | <i>V</i> | -156.0262           | -156.0200         | -0.170                 |
|                     | Tetrahydrofuran      | 7.58       | <i>V</i> | -156.0264           | -156.0243         | -0.057                 |
|                     | Dichloroethane       | 10.36      | <i>V</i> | -156.0266           | -156.0277         | 0.030                  |
|                     | Acetone              | 20.70      | <i>V</i> | -156.0268           | -156.0323         | 0.150                  |
|                     | Ethanol              | 24.55      | <i>V</i> | -156.0268           | -156.0330         | 0.170                  |
|                     | Acetonitrile         | 36.64      | <i>V</i> | -156.0269           | -156.0344         | 0.204                  |
|                     | Dimethylsulfoxide    | 46.70      | <i>V</i> | -156.0269           | -156.0349         | 0.218                  |
|                     | Water                | 78.39      | <i>V</i> | -156.0269           | -156.0358         | 0.242                  |
|                     | EA experimental /eV  |            |          | -2.00               |                   |                        |
|                     | EA Linear extrap./eV |            |          | -2.12               |                   |                        |
| $R^2$               |                      |            | 0.9997   |                     |                   |                        |
| Species             | Media                | $\epsilon$ | type     | $E(\text{neutral})$ | $E(\text{anion})$ | $\Delta E / \text{eV}$ |
| <b>Cyclopentene</b> | Argon                | 1.43       | <i>N</i> | -195.3910           | -195.3612         | -0.809                 |
|                     | Krypton              | 1.52       | <i>N</i> | -195.3910           | -195.3636         | -0.747                 |
|                     | Heptane              | 1.92       | <i>N</i> | -195.3913           | -195.3716         | -0.537                 |
|                     | Ciclohexane          | 2.02       | <i>N</i> | -195.3914           | -195.3732         | -0.496                 |
|                     | Benzene              | 2.25       | <i>N</i> | -195.3915           | -195.3761         | -0.420                 |
|                     | Ethyl Ether          | 4.34       | <i>N</i> | -195.3921           | -195.3891         | -0.082                 |
|                     | Chloroform           | 4.90       | <i>N</i> | -195.3922           | -195.3909         | -0.037                 |
|                     | Chlorobenzene        | 5.62       | <i>N</i> | -195.3923           | -195.3927         | 0.010                  |
|                     | Tetrahydrofuran      | 7.58       | <i>V</i> | -195.3925           | -195.3833         | -0.251                 |
|                     | Dichloroethane       | 10.36      | <i>V</i> | -195.3927           | -195.3866         | -0.165                 |
|                     | Acetone              | 20.70      | <i>V</i> | -195.3929           | -195.3912         | -0.045                 |
|                     | Ethanol              | 24.55      | <i>V</i> | -195.3929           | -195.3920         | -0.026                 |
|                     | Acetonitrile         | 36.64      | <i>V</i> | -195.3930           | -195.3933         | 0.008                  |
|                     | Dimethylsulfoxide    | 46.70      | <i>V</i> | -195.3930           | -195.3938         | 0.023                  |
|                     | Water                | 78.39      | <i>V</i> | -195.3930           | -195.3948         | 0.046                  |
|                     | EA experimental /eV  |            |          | -2.14               |                   |                        |
|                     | EA Linear extrap./eV |            |          | -2.42               |                   |                        |
| $R^2$               |                      |            | 0.9999   |                     |                   |                        |

| Species                       | Media                         | $\epsilon$ | type   | $E(\text{neutral})$ | $E(\text{anion})$ | $\Delta E / \text{eV}$ |
|-------------------------------|-------------------------------|------------|--------|---------------------|-------------------|------------------------|
| <b>Di-tert-butyl-peroxide</b> | Argon                         | 1.4300     | N      | -466.2256           | -466.2009         | -0.67                  |
|                               | Krypton                       | 1.5190     | N      | -466.2257           | -466.2027         | -0.63                  |
|                               | Heptane                       | 1.9200     | N      | -466.2261           | -466.2093         | -0.46                  |
|                               | Ciclohexane                   | 2.0230     | N      | -466.2262           | -466.2104         | -0.43                  |
|                               | Benzene                       | 2.2470     | N      | -466.2264           | -466.2128         | -0.37                  |
|                               | Ethyl Ether                   | 4.3350     | N      | -466.2275           | -466.2236         | -0.11                  |
|                               | Chloroform                    | 4.9000     | N      | -466.2278           | -466.2250         | -0.08                  |
|                               | Chlorobenzene                 | 5.6210     | N      | -466.2278           | -466.2265         | -0.04                  |
|                               | Tetrahydrofuran               | 7.5800     | N      | -466.2283           | -466.2290         | 0.02                   |
|                               | Dichloroethane                | 10.3600    | N      | -466.2285           | -466.2311         | 0.07                   |
|                               | Acetone                       | 20.7000    | N      | -466.2291           | -466.2341         | 0.13                   |
|                               | Ethanol                       | 24.5500    | V      | -466.2295           | -466.2307         | 0.03                   |
|                               | Acetonitrile                  | 36.6400    | V      | -466.2297           | -466.2318         | 0.06                   |
|                               | EA experimental / $\epsilon$  |            | -2.00  |                     |                   |                        |
|                               | EA Linear extrap./ $\epsilon$ |            | -1.80  |                     |                   |                        |
| $R^2$                         |                               | 0.9951     |        |                     |                   |                        |
| Species                       | Media                         | $\epsilon$ | type   | $E(\text{neutral})$ | $E(\text{anion})$ | $\Delta E / \text{eV}$ |
| <b>Ethylene Carbonate</b>     | Argon                         | 1.43       | N      | -342.5282           | -342.5073         | -0.569                 |
|                               | Krypton                       | 1.52       | N      | -342.5290           | -342.5097         | -0.526                 |
|                               | Heptane                       | 1.92       | N      | -342.5315           | -342.5176         | -0.378                 |
|                               | Ciclohexane                   | 2.02       | N      | -342.5322           | -342.5192         | -0.353                 |
|                               | Benzene                       | 2.25       | N      | -342.5334           | -342.5221         | -0.307                 |
|                               | Ethyl Ether                   | 4.34       | N      | -342.5390           | -342.5209         | -0.494                 |
|                               | Chloroform                    | 4.90       | N      | -342.5401           | -342.5232         | -0.458                 |
|                               | Chlorobenzene                 | 5.62       | N      | -342.5407           | -342.5259         | -0.404                 |
|                               | Tetrahydrofuran               | 7.58       | V      | -342.5425           | -342.5309         | -0.314                 |
|                               | Dichloroethane                | 10.36      | V      | -342.5438           | -342.5356         | -0.221                 |
|                               | Acetone                       | 20.70      | V      | -342.5457           | -342.5429         | -0.076                 |
|                               | Ethanol                       | 24.55      | V      | -342.5462           | -342.5441         | -0.058                 |
|                               | Acetonitrile                  | 36.64      | V      | -342.5469           | -342.5462         | -0.017                 |
|                               | Dimethylsulfoxide             | 46.70      | V      | -342.5468           | -342.5472         | 0.012                  |
|                               | EA experimental /eV           |            |        | -2.93               |                   |                        |
| EA Linear extrap./eV          |                               |            | -2.85  |                     |                   |                        |
| $R^2$                         |                               |            | 0.9979 |                     |                   |                        |
| Species                       | Media                         | $\epsilon$ | type   | $E(\text{neutral})$ | $E(\text{anion})$ | $\Delta E / \text{eV}$ |
| <b>Fuorethylene</b>           | Argon                         | 1.43       | V      | -177.8940           | -177.8534         | -1.103                 |
|                               | Krypton                       | 1.52       | V      | -177.8941           | -177.8570         | -1.010                 |
|                               | Heptane                       | 1.92       | V      | -177.8946           | -177.8691         | -0.694                 |
|                               | Ciclohexane                   | 2.02       | V      | -177.8947           | -177.8715         | -0.633                 |
|                               | Benzene                       | 2.25       | V      | -177.8950           | -177.8759         | -0.518                 |
|                               | Ethyl Ether                   | 4.34       | V      | -177.8960           | -177.8955         | -0.014                 |
|                               | Chloroform                    | 4.90       | V      | -177.8962           | -177.8981         | 0.050                  |
|                               | Chlorobenzene                 | 5.62       | V      | -177.8964           | -177.9004         | 0.111                  |
|                               | Tetrahydrofuran               | 7.58       | V      | -177.8967           | -177.9049         | 0.223                  |
|                               | Dichloroethane                | 10.36      | V      | -177.8969           | -177.9082         | 0.308                  |
|                               | Acetone                       | 20.70      | V      | -177.8972           | -177.9129         | 0.425                  |
|                               | Ethanol                       | 24.55      | V      | -177.8973           | -177.9136         | 0.443                  |
|                               | Acetonitrile                  | 36.64      | V      | -177.8974           | -177.9149         | 0.476                  |
|                               | Dimethylsulfoxide             | 46.70      | V      | -177.8975           | -177.9155         | 0.490                  |
|                               | Water                         | 78.39      | V      | -177.8975           | -177.9163         | 0.511                  |
| EA experimental /eV           |                               |            | -1.91  |                     |                   |                        |
| EA Linear extrap./eV          |                               |            | -1.82  |                     |                   |                        |
| $R^2$                         |                               |            | 0.9999 |                     |                   |                        |

| Species          | Media               | $\epsilon$          | type     | $E(\text{neutral})$ | $E(\text{anion})$ | $\Delta E / \text{eV}$ |  |
|------------------|---------------------|---------------------|----------|---------------------|-------------------|------------------------|--|
| <b>Formamide</b> | Argon               | 1.43                | <i>N</i> | -169.9662           | -169.9421         | -0.655                 |  |
|                  | Krypton             | 1.52                | <i>N</i> | -169.9668           | -169.9450         | -0.592                 |  |
|                  | Heptane             | 1.92                | <i>V</i> | -169.9690           | -169.9328         | -0.986                 |  |
|                  | Ciclohexane         | 2.02                | <i>V</i> | -169.9695           | -169.9355         | -0.924                 |  |
|                  | Benzene             | 2.25                | <i>V</i> | -169.9704           | -169.9407         | -0.809                 |  |
|                  | Ethyl Ether         | 4.34                | <i>V</i> | -169.9751           | -169.9645         | -0.288                 |  |
|                  | Chloroform          | 4.90                | <i>V</i> | -169.9757           | -169.9676         | -0.221                 |  |
|                  | Chlorobenzene       | 5.62                | <i>V</i> | -169.9764           | -169.9707         | -0.155                 |  |
|                  | Tetrahydrofuran     | 7.58                | <i>V</i> | -169.9777           | -169.9763         | -0.037                 |  |
|                  | Dichloroethane      | 10.36               | <i>V</i> | -169.9787           | -169.9807         | 0.055                  |  |
|                  | Acetone             | 20.70               | <i>V</i> | -169.9802           | -169.9868         | 0.181                  |  |
|                  | Ethanol             | 24.55               | <i>V</i> | -169.9804           | -169.9878         | 0.201                  |  |
|                  | Acetonitrile        | 36.64               | <i>V</i> | -169.9808           | -169.9895         | 0.237                  |  |
|                  | Dimethylsulfoxide   | 46.70               | <i>V</i> | -169.9810           | -169.9903         | 0.252                  |  |
|                  | Water               | 78.39               | <i>V</i> | -169.9813           | -169.9915         | 0.277                  |  |
|                  |                     | EA experimental /eV |          | -2.05               |                   |                        |  |
|                  | EALinear extrap./eV |                     | -2.19    |                     |                   |                        |  |
|                  | R <sup>2</sup>      |                     | 0.9996   |                     |                   |                        |  |
| Species          | Media               | $\epsilon$          | type     | $E(\text{neutral})$ | $E(\text{anion})$ | $\Delta E / \text{eV}$ |  |
| <b>Furan</b>     | Argon               | 1.43                | <i>V</i> | -230.1023           | -230.0630         | -1.070                 |  |
|                  | Krypton             | 1.52                | <i>V</i> | -230.1026           | -230.0664         | -0.983                 |  |
|                  | Heptane             | 1.92                | <i>V</i> | -230.1033           | -230.0781         | -0.687                 |  |
|                  | Ciclohexane         | 2.02                | <i>V</i> | -230.1035           | -230.0804         | -0.629                 |  |
|                  | Benzene             | 2.25                | <i>V</i> | -230.1038           | -230.0847         | -0.521                 |  |
|                  | Ethyl Ether         | 4.34                | <i>V</i> | -230.1055           | -230.1041         | -0.039                 |  |
|                  | Chloroform          | 4.90                | <i>V</i> | -230.1058           | -230.1066         | 0.023                  |  |
|                  | Chlorobenzene       | 5.62                | <i>V</i> | -230.1060           | -230.1091         | 0.083                  |  |
|                  | Tetrahydrofuran     | 7.58                | <i>V</i> | -230.1065           | -230.1135         | 0.191                  |  |
|                  | Dichloroethane      | 10.36               | <i>V</i> | -230.1069           | -230.1170         | 0.275                  |  |
|                  | Acetone             | 20.70               | <i>V</i> | -230.1074           | -230.1218         | 0.390                  |  |
|                  | Ethanol             | 24.55               | <i>V</i> | -230.1075           | -230.1225         | 0.409                  |  |
|                  | Acetonitrile        | 36.64               | <i>V</i> | -230.1077           | -230.1239         | 0.441                  |  |
|                  | Dimethylsulfoxide   | 46.70               | <i>V</i> | -230.1078           | -230.1245         | 0.455                  |  |
|                  | Water               | 78.39               | <i>V</i> | -230.1079           | -230.1255         | 0.479                  |  |
|                  |                     | EA experimental /eV |          | -1.76               |                   |                        |  |
|                  | EALinear extrap./eV |                     | -1.75    |                     |                   |                        |  |
|                  | R <sup>2</sup>      |                     | 0.9997   |                     |                   |                        |  |
| Species          | Media               | $\epsilon$          | type     | $E(\text{neutral})$ | $E(\text{anion})$ | $\Delta E / \text{eV}$ |  |
| <b>Guanine</b>   | Ciclohexane         | 2.02                | <i>N</i> | -542.7610           | -542.7620         | 0.028                  |  |
|                  | Benzene             | 2.25                | <i>V</i> | -542.7634           | -542.7620         | -0.037                 |  |
|                  | Ethyl Ether         | 4.34                | <i>V</i> | -542.7752           | -542.7925         | 0.472                  |  |
|                  | Chloroform          | 4.90                | <i>V</i> | -542.7772           | -542.7968         | 0.532                  |  |
|                  | Chlorobenzene       | 5.62                | <i>V</i> | -542.7787           | -542.8009         | 0.604                  |  |
|                  | Tetrahydrofuran     | 7.58                | <i>V</i> | -542.7823           | -542.8086         | 0.716                  |  |
|                  | Dichloroethane      | 10.36               | <i>V</i> | -542.7851           | -542.8148         | 0.808                  |  |
|                  | Acetone             | 20.70               | <i>V</i> | -542.7891           | -542.8235         | 0.935                  |  |
|                  | Ethanol             | 24.55               | <i>V</i> | -542.7898           | -542.8250         | 0.958                  |  |
|                  | Acetonitrile        | 36.64               | <i>V</i> | -542.7910           | -542.8275         | 0.995                  |  |
|                  | Dimethylsulfoxide   | 46.70               | <i>V</i> | -542.7915           | -542.8286         | 1.009                  |  |
|                  | Water               | 78.39               | <i>V</i> | -542.7934           | -542.8308         | 1.017                  |  |
|                  |                     | EA experimental /eV |          | -1.40               |                   |                        |  |
|                  |                     | EALinear extrap./eV |          | -1.41               |                   |                        |  |
|                  |                     | R <sup>2</sup>      |          | 0.9992              |                   |                        |  |

| Species                   | Media                | $\epsilon$          | type     | $E(\text{neutral})$ | $E(\text{anion})$ | $\Delta E / \text{eV}$ |
|---------------------------|----------------------|---------------------|----------|---------------------|-------------------|------------------------|
| <b>Imidazole</b>          | Argon                | 1.43                | <i>N</i> | -226.2987           | -226.2504         | -1.316                 |
|                           | Krypton              | 1.52                | <i>N</i> | -226.2993           | -226.2535         | -1.246                 |
|                           | Heptane              | 1.92                | <i>N</i> | -226.3015           | -226.2650         | -0.994                 |
|                           | Ciclohexane          | 2.02                | <i>N</i> | -226.3020           | -226.2673         | -0.944                 |
|                           | Benzene              | 2.25                | <i>V</i> | -226.3029           | -226.2717         | -0.849                 |
|                           | Ethyl Ether          | 4.34                | <i>V</i> | -226.3075           | -226.2931         | -0.394                 |
|                           | Chloroform           | 4.90                | <i>V</i> | -226.3083           | -226.2959         | -0.336                 |
|                           | Chlorobenzene        | 5.62                | <i>V</i> | -226.3089           | -226.2990         | -0.272                 |
|                           | Tetrahydrofuran      | 7.58                | <i>V</i> | -226.3103           | -226.3043         | -0.163                 |
|                           | Dichloroethane       | 10.36               | <i>V</i> | -226.3114           | -226.3085         | -0.077                 |
|                           | Acetone              | 20.70               | <i>V</i> | -226.3129           | -226.3146         | 0.045                  |
|                           | Ethanol              | 24.55               | <i>V</i> | -226.3131           | -226.3155         | 0.063                  |
|                           | Acetonitrile         | 36.64               | <i>V</i> | -226.3136           | -226.3172         | 0.098                  |
|                           | Dimethylsulfoxide    | 46.70               | <i>V</i> | -226.3138           | -226.3181         | 0.117                  |
|                           | Water                | 78.39               | <i>V</i> | -226.3145           | -226.3190         | 0.122                  |
|                           |                      | EA experimental /eV |          | -2.13               |                   |                        |
|                           | EA Linear extrap./eV |                     | -2.15    |                     |                   |                        |
|                           | R <sup>2</sup>       |                     | 0.9981   |                     |                   |                        |
| Species                   | Media                | $\epsilon$          | type     | $E(\text{neutral})$ | $E(\text{anion})$ | $\Delta E / \text{eV}$ |
| <b>methyl vinyl ether</b> | Argon                | 1.43                | <i>N</i> | -193.1857           | -193.1530         | -0.89                  |
|                           | Krypton              | 1.52                | <i>N</i> | -193.1859           | -193.1551         | -0.84                  |
|                           | Heptane              | 1.92                | <i>V</i> | -193.1868           | -193.1508         | -0.98                  |
|                           | Ciclohexane          | 2.02                | <i>V</i> | -193.1870           | -193.1533         | -0.92                  |
|                           | Benzene              | 2.25                | <i>V</i> | -193.1874           | -193.1578         | -0.8                   |
|                           | Ethyl Ether          | 4.34                | <i>V</i> | -193.1893           | -193.1800         | -0.25                  |
|                           | Chloroform           | 4.9                 | <i>V</i> | -193.1896           | -193.1829         | -0.18                  |
|                           | Chlorobenzene        | 5.62                | <i>V</i> | -193.1899           | -193.1860         | -0.11                  |
|                           | Tetrahydrofuran      | 7.58                | <i>V</i> | -193.1904           | -193.1913         | 0.02                   |
|                           | Dichloroethane       | 10.36               | <i>V</i> | -193.1909           | -193.1956         | 0.13                   |
|                           | Acetone              | 20.7                | <i>V</i> | -193.1916           | -193.2016         | 0.27                   |
|                           | Ethanol              | 24.55               | <i>V</i> | -193.1917           | -193.2025         | 0.29                   |
|                           | Acetonitrile         | 36.64               | <i>V</i> | -193.1919           | -193.2043         | 0.34                   |
|                           | Dimethylsulfoxide    | 45.6                | <i>V</i> | -193.1919           | -193.2052         | 0.36                   |
|                           | Water                | 78.39               | <i>V</i> | -193.1922           | -193.2060         | 0.38                   |
|                           |                      | EA experimental /eV |          | -2.30               |                   |                        |
|                           | EA Linear extrap./eV |                     | -2.30    |                     |                   |                        |
|                           | R <sup>2</sup>       |                     | 0.9999   |                     |                   |                        |
| Species                   | Media                | $\epsilon$          | type     | $E(\text{neutral})$ | $E(\text{anion})$ | $\Delta E / \text{eV}$ |
| <b>Propene</b>            | Argon                | 1.43                | <i>V</i> | -117.9512           | -117.9076         | -1.188                 |
|                           | Krypton              | 1.52                | <i>V</i> | -117.9513           | -117.9109         | -1.100                 |
|                           | Heptane              | 1.92                | <i>V</i> | -117.9515           | -117.9222         | -0.799                 |
|                           | Ciclohexane          | 2.02                | <i>V</i> | -117.9516           | -117.9244         | -0.741                 |
|                           | Benzene              | 2.25                | <i>V</i> | -117.9517           | -117.9285         | -0.630                 |
|                           | Ethyl Ether          | 4.34                | <i>V</i> | -117.9522           | -117.9472         | -0.137                 |
|                           | Chloroform           | 4.90                | <i>V</i> | -117.9523           | -117.9496         | -0.073                 |
|                           | Chlorobenzene        | 5.62                | <i>V</i> | -117.9523           | -117.9519         | -0.011                 |
|                           | Tetrahydrofuran      | 7.58                | <i>V</i> | -117.9525           | -117.9561         | 0.100                  |
|                           | Dichloroethane       | 10.36               | <i>V</i> | -117.9526           | -117.9594         | 0.186                  |
|                           | Acetone              | 20.70               | <i>V</i> | -117.9528           | -117.9640         | 0.305                  |
|                           | Ethanol              | 24.55               | <i>V</i> | -117.9528           | -117.9647         | 0.324                  |
|                           | Acetonitrile         | 36.64               | <i>V</i> | -117.9528           | -117.9660         | 0.358                  |
|                           | Dimethylsulfoxide    | 46.70               | <i>V</i> | -117.9529           | -117.9665         | 0.372                  |
|                           | Water                | 78.39               | <i>V</i> | -117.9529           | -117.9674         | 0.395                  |
|                           |                      | EA experimental /eV |          | -1.99               |                   |                        |
|                           | EA Linear extrap./eV |                     | -1.90    |                     |                   |                        |
|                           | R <sup>2</sup>       |                     | 0.9996   |                     |                   |                        |

| Species              | Media                | $\epsilon$ | type   | $E(\text{neutral})$ | $E(\text{anion})$ | $\Delta E / \text{eV}$ |
|----------------------|----------------------|------------|--------|---------------------|-------------------|------------------------|
| <b>Propyne</b>       | Argon                | 1.43       | N      | -116.7000           | -116.6684         | -0.860                 |
|                      | Krypton              | 1.52       | N      | -116.7002           | -116.6704         | -0.813                 |
|                      | Heptane              | 1.92       | N      | -116.7010           | -116.6773         | -0.643                 |
|                      | Ciclohexane          | 2.02       | N      | -116.7011           | -116.6787         | -0.611                 |
|                      | Benzene              | 2.25       | N      | -116.7015           | -116.6813         | -0.548                 |
|                      | Ethyl Ether          | 4.34       | N      | -116.7030           | -116.6941         | -0.243                 |
|                      | Chloroform           | 4.9        | V      | -116.7033           | -116.6785         | -0.674                 |
|                      | Chlorobenzene        | 5.62       | V      | -116.7035           | -116.6810         | -0.610                 |
|                      | Tetrahydrofuran      | 7.58       | V      | -116.7039           | -116.6854         | -0.503                 |
|                      | Dichloroethane       | 10.36      | V      | -116.7042           | -116.6890         | -0.415                 |
|                      | Acetone              | 20.7       | V      | -116.7047           | -116.6941         | -0.290                 |
|                      | Ethanol              | 24.55      | V      | -116.7048           | -116.6949         | -0.270                 |
|                      | Dimethylsulfoxide    | 45.6       | V      | -116.7050           | -116.6971         | -0.216                 |
|                      | Water                | 78.39      | V      | -116.7052           | -116.6979         | -0.198                 |
|                      | EA experimental /eV  |            |        | -2.80               |                   |                        |
|                      | EA Linear extrap./eV |            |        | -2.67               |                   |                        |
|                      | R <sup>2</sup>       |            |        | 0.9997              |                   |                        |
| Species              | Media                | $\epsilon$ | type   | $E(\text{neutral})$ | $E(\text{anion})$ | $\Delta E / \text{eV}$ |
| <b>Propiolactone</b> | Argon                | 1.43       | N      | -267.2526           | -267.2319         | -0.562                 |
|                      | Krypton              | 1.52       | N      | -267.2530           | -267.2346         | -0.500                 |
|                      | Heptane              | 1.92       | N      | -267.2544           | -267.2438         | -0.289                 |
|                      | Ciclohexane          | 2.02       | V      | -267.2547           | -267.2311         | -0.643                 |
|                      | Benzene              | 2.25       | V      | -267.2553           | -267.2354         | -0.543                 |
|                      | Ethyl Ether          | 4.34       | V      | -267.2582           | -267.2564         | -0.050                 |
|                      | Chloroform           | 4.90       | V      | -267.2586           | -267.2593         | 0.018                  |
|                      | Chlorobenzene        | 5.62       | V      | -267.2590           | -267.2622         | 0.087                  |
|                      | Tetrahydrofuran      | 7.58       | V      | -267.2598           | -267.2675         | 0.210                  |
|                      | Dichloroethane       | 10.36      | V      | -267.2605           | -267.2718         | 0.308                  |
|                      | Acetone              | 20.70      | V      | -267.2614           | -267.2777         | 0.444                  |
|                      | Ethanol              | 24.55      | V      | -267.2615           | -267.2786         | 0.466                  |
|                      | Acetonitrile         | 36.64      | V      | -267.2618           | -267.2803         | 0.505                  |
|                      | Dimethylsulfoxide    | 46.70      | V      | -267.2619           | -267.2811         | 0.522                  |
|                      | Water                | 78.39      | V      | -267.2621           | -267.2822         | 0.548                  |
|                      | EA experimental /eV  |            |        | -1.90               |                   |                        |
|                      | EA Linear extrap./eV |            |        | -1.93               |                   |                        |
| R <sup>2</sup>       |                      |            | 0.9969 |                     |                   |                        |
| Species              | Media                | $\epsilon$ | type   | $E(\text{neutral})$ | $E(\text{anion})$ | $\Delta E / \text{eV}$ |
| <b>Pyrrole</b>       | Argon                | 1.43       | N      | -210.2441           | -210.2229         | -0.578                 |
|                      | Kripton              | 1.52       | N      | -210.2445           | -210.2253         | -0.523                 |
|                      | Ciclohexane          | 2.02       | N      | -210.2462           | -210.2350         | -0.304                 |
|                      | Benzene              | 2.25       | N      | -210.2468           | -210.2381         | -0.238                 |
|                      | Ether                | 4.34       | V      | -210.2500           | -210.2285         | -0.586                 |
|                      | Chloroform           | 4.9        | V      | -210.2505           | -210.2311         | -0.529                 |
|                      | Chlorobenzene        | 5.62       | V      | -210.2509           | -210.2336         | -0.472                 |
|                      | Tetrahydrofuran      | 7.58       | V      | -210.2518           | -210.2382         | -0.371                 |
|                      | Dichloroethane       | 10.36      | V      | -210.2526           | -210.2419         | -0.291                 |
|                      | Acetone              | 20.7       | V      | -210.2537           | -210.2478         | -0.159                 |
|                      | Dimethylsulfoxide    | 46.7       | V      | -210.2543           | -210.2499         | -0.119                 |
|                      | Water                | 78.39      | V      | -210.2546           | -210.2510         | -0.098                 |
|                      | EA experimental /eV  |            |        | -2.38               |                   |                        |
|                      | EA Linear extrap./eV |            |        | -2.21               |                   |                        |
|                      | R <sup>2</sup>       |            |        | 0.9985              |                   |                        |

| Species                         | Media                | $\epsilon$ | type   | $E(\text{neutral})$ | $E(\text{anion})$ | $\Delta E / \text{eV}$ |
|---------------------------------|----------------------|------------|--------|---------------------|-------------------|------------------------|
| <b>Tetramethyl ethylene</b>     | Ciclohexane          | 2.02       | N      | -235.9296           | -235.9127         | -0.458                 |
|                                 | Benzene              | 2.25       | N      | -235.9297           | -235.9152         | -0.396                 |
|                                 | Ethyl Ether          | 4.34       | V      | -235.9303           | -235.9061         | -0.657                 |
|                                 | Chloroform           | 4.9        | V      | -235.9303           | -235.9083         | -0.600                 |
|                                 | Chlorobenzene        | 5.62       | V      | -235.9304           | -235.9110         | -0.529                 |
|                                 | Tetrahydrofuran      | 7.58       | V      | -235.9306           | -235.9153         | -0.415                 |
|                                 | Dichloroethane       | 10.36      | V      | -235.9307           | -235.9188         | -0.324                 |
|                                 | Acetone              | 20.7       | V      | -235.9308           | -235.9236         | -0.196                 |
|                                 | Ethanol              | 24.55      | V      | -235.9309           | -235.9245         | -0.173                 |
|                                 | Acetonitrile         | 36.64      | V      | -235.9309           | -235.9260         | -0.134                 |
|                                 | EA experimental /eV  |            |        | -2.27               |                   |                        |
|                                 | EA Linear extrap./eV |            |        | -2.65               |                   |                        |
|                                 | $R^2$                |            |        | 0.9994              |                   |                        |
| Species                         | Media                | $\epsilon$ | type   | $E(\text{neutral})$ | $E(\text{anion})$ | $\Delta E / \text{eV}$ |
| <b>trans-1-bromo-1-propene</b>  | Argon                | 1.43       | V      | -2691.4944          | -2691.4629        | -0.859                 |
|                                 | Krypton              | 1.52       | V      | -2691.4946          | -2691.4660        | -0.777                 |
|                                 | Heptane              | 1.92       | V      | -2691.4951          | -2691.4768        | -0.496                 |
|                                 | Ciclohexane          | 2.02       | V      | -2691.4952          | -2691.4789        | -0.441                 |
|                                 | Benzene              | 2.25       | V      | -2691.4954          | -2691.4829        | -0.339                 |
|                                 | Ethyl Ether          | 4.34       | V      | -2691.4964          | -2691.5008        | 0.119                  |
|                                 | Chloroform           | 4.90       | V      | -2691.4966          | -2691.5031        | 0.178                  |
|                                 | Chlorobenzene        | 5.62       | V      | -2691.4967          | -2691.5054        | 0.235                  |
|                                 | Tetrahydrofuran      | 7.58       | V      | -2691.4970          | -2691.5094        | 0.338                  |
|                                 | Dichloroethane       | 10.36      | V      | -2691.4973          | -2691.5126        | 0.417                  |
|                                 | Acetone              | 20.70      | V      | -2691.4976          | -2691.5170        | 0.528                  |
|                                 | Ethanol              | 24.55      | V      | -2691.4977          | -2691.5177        | 0.545                  |
|                                 | Acetonitrile         | 36.64      | V      | -2691.4978          | -2691.5190        | 0.575                  |
|                                 | Dimethylsulfoxide    | 46.70      | V      | -2691.4979          | -2691.5195        | 0.587                  |
|                                 | Water                | 78.39      | V      | -2691.4979          | -2691.5204        | 0.613                  |
|                                 | EA experimental /eV  |            |        | -1.30               |                   |                        |
|                                 | EA Linear extrap./eV |            |        | -1.52               |                   |                        |
| $R^2$                           |                      |            | 0.9997 |                     |                   |                        |
| Species                         | Media                | $\epsilon$ | type   | $E(\text{neutral})$ | $E(\text{anion})$ | $\Delta E / \text{eV}$ |
| <b>trans-1-chloro-1-propene</b> | Argon                | 1.43       | V      | -577.5800           | -577.5452         | -0.948                 |
|                                 | Krypton              | 1.52       | V      | -577.5802           | -577.5484         | -0.863                 |
|                                 | Heptane              | 1.92       | V      | -577.5806           | -577.5595         | -0.575                 |
|                                 | Ciclohexane          | 2.02       | V      | -577.5808           | -577.5617         | -0.519                 |
|                                 | Benzene              | 2.25       | V      | -577.5810           | -577.5658         | -0.414                 |
|                                 | Ethyl Ether          | 4.34       | V      | -577.5820           | -577.5841         | 0.057                  |
|                                 | Chloroform           | 4.90       | V      | -577.5822           | -577.5864         | 0.117                  |
|                                 | Chlorobenzene        | 5.62       | V      | -577.5823           | -577.5888         | 0.176                  |
|                                 | Tetrahydrofuran      | 7.58       | V      | -577.5826           | -577.5929         | 0.281                  |
|                                 | Dichloroethane       | 10.36      | V      | -577.5828           | -577.5962         | 0.363                  |
|                                 | Acetone              | 20.70      | V      | -577.5832           | -577.6006         | 0.475                  |
|                                 | Ethanol              | 24.55      | V      | -577.5832           | -577.6014         | 0.494                  |
|                                 | Acetonitrile         | 36.64      | V      | -577.5833           | -577.6027         | 0.526                  |
|                                 | Dimethylsulfoxide    | 46.70      | V      | -577.5834           | -577.6032         | 0.539                  |
|                                 | Water                | 78.39      | V      | -577.5835           | -577.6042         | 0.563                  |
|                                 | EA experimental /eV  |            |        | -1.49               |                   |                        |
|                                 | EA Linear extrap./eV |            |        | -1.63               |                   |                        |
| $R^2$                           |                      |            | 0.9997 |                     |                   |                        |



| Species                          | Media                | $\epsilon$ | type   | $E(\text{neutral})$ | $E(\text{anion})$ | $\Delta E / \text{eV}$ |
|----------------------------------|----------------------|------------|--------|---------------------|-------------------|------------------------|
| <b>Trans-1,2-difluorethylene</b> | Argon                | 1.43       | V      | -277.1561           | -277.1137         | -1.153                 |
|                                  | Krypton              | 1.52       | V      | -277.1563           | -277.1173         | -1.063                 |
|                                  | Heptane              | 1.92       | V      | -277.1571           | -277.1292         | -0.759                 |
|                                  | Ciclohexane          | 2.02       | V      | -277.1572           | -277.1315         | -0.699                 |
|                                  | Benzene              | 2.25       | V      | -277.1575           | -277.1359         | -0.589                 |
|                                  | Ethyl Ether          | 4.34       | V      | -277.1590           | -277.1553         | -0.101                 |
|                                  | Chloroform           | 4.90       | V      | -277.1592           | -277.1577         | -0.039                 |
|                                  | Chlorobenzene        | 5.62       | V      | -277.1594           | -277.1601         | 0.021                  |
|                                  | Tetrahydrofuran      | 7.58       | V      | -277.1598           | -277.1645         | 0.127                  |
|                                  | Dichloroethane       | 10.36      | V      | -277.1601           | -277.1678         | 0.210                  |
|                                  | Acetone              | 20.70      | V      | -277.1606           | -277.1724         | 0.322                  |
|                                  | Ethanol              | 24.55      | V      | -277.1606           | -277.1731         | 0.340                  |
|                                  | Acetonitrile         | 36.64      | V      | -277.1608           | -277.1744         | 0.372                  |
|                                  | Water                | 78.39      | V      | -277.1609           | -277.1758         | 0.407                  |
|                                  | EA experimental /eV  |            |        | -1.84               |                   |                        |
|                                  | EA Linear extrap./eV |            |        | -1.85               |                   |                        |
|                                  | $R^2$                |            |        | 0.9999              |                   |                        |
| Species                          | Media                | $\epsilon$ | type   | $E(\text{neutral})$ | $E(\text{anion})$ | $\Delta E / \text{eV}$ |
| <b>trans-2-butene</b>            | Argon                | 1.43       | N      | -157.2818           | -157.2477         | -0.930                 |
|                                  | Krypton              | 1.52       | N      | -157.2819           | -157.2501         | -0.865                 |
|                                  | Heptane              | 1.92       | V      | -157.2821           | -157.2410         | -1.120                 |
|                                  | Ciclohexane          | 2.02       | V      | -157.2822           | -157.2430         | -1.065                 |
|                                  | Benzene              | 2.25       | V      | -157.2823           | -157.2469         | -0.962                 |
|                                  | Ethyl Ether          | 4.34       | V      | -157.2828           | -157.2644         | -0.498                 |
|                                  | Chloroform           | 4.90       | V      | -157.2828           | -157.2667         | -0.438                 |
|                                  | Chlorobenzene        | 5.62       | V      | -157.2829           | -157.2690         | -0.379                 |
|                                  | Tetrahydrofuran      | 7.58       | V      | -157.2831           | -157.2730         | -0.273                 |
|                                  | Dichloroethane       | 10.36      | V      | -157.2832           | -157.2762         | -0.190                 |
|                                  | Acetone              | 20.70      | V      | -157.2834           | -157.2806         | -0.075                 |
|                                  | Ethanol              | 24.55      | V      | -157.2834           | -157.2813         | -0.056                 |
|                                  | Acetonitrile         | 36.64      | V      | -157.2834           | -157.2826         | -0.023                 |
|                                  | Dimethylsulfoxide    | 46.70      | V      | -157.2835           | -157.2831         | -0.010                 |
|                                  | Water                | 78.39      | V      | -157.2835           | -157.2841         | 0.016                  |
| Species                          | Media                | $\epsilon$ | type   | $E(\text{neutral})$ | $E(\text{anion})$ | $\Delta E / \text{eV}$ |
| <b>trifluorethylene</b>          | Ciclohexane          | 2.02       | N      | -376.4294           | -376.4123         | -0.466                 |
|                                  | Benzene              | 2.25       | N      | -376.4298           | -376.4152         | -0.395                 |
|                                  | Ethyl Ether          | 4.34       | V      | -376.4316           | -376.4144         | -0.466                 |
|                                  | Chloroform           | 4.9        | V      | -376.4319           | -376.4168         | -0.412                 |
|                                  | Chlorobenzene        | 5.62       | V      | -376.4321           | -376.4192         | -0.351                 |
|                                  | Tetrahydrofuran      | 7.58       | V      | -376.4327           | -376.4234         | -0.253                 |
|                                  | Dichloroethane       | 10.36      | V      | -376.4331           | -376.4267         | -0.175                 |
|                                  | Acetone              | 20.7       | V      | -376.4337           | -376.4312         | -0.068                 |
|                                  | Ethanol              | 24.55      | V      | -376.4339           | -376.4319         | -0.054                 |
|                                  | Acetonitrile         | 36.64      | V      | -376.4341           | -376.4332         | -0.024                 |
|                                  | Dimethylsulfoxide    | 46.7       | V      | -376.4341           | -376.4339         | -0.006                 |
|                                  | Water                | 78.39      | V      | -376.4349           | -376.4344         | -0.012                 |
|                                  | EA experimental /eV  |            |        | -2.40               |                   |                        |
| EA Linear extrap./eV             |                      |            | -2.15  |                     |                   |                        |
| $R^2$                            |                      |            | 0.9999 |                     |                   |                        |

| Species             | Media           | $\epsilon$ | type     | $E(\text{neutral})$ | $E(\text{anion})$ | $\Delta E / \text{eV}$ |
|---------------------|-----------------|------------|----------|---------------------|-------------------|------------------------|
| <b>acetonitrile</b> | Argon           | 1.43       | <i>N</i> | -132.8044           | -132.7906         | -0.376                 |
|                     | Krypton         | 1.51       | <i>N</i> | -132.8047           | -132.7934         | -0.308                 |
|                     | Heptane         | 1.92       | <i>N</i> | -132.8058           | -132.8030         | -0.077                 |
|                     | Ciclohexane     | 2.02       | <i>N</i> | -132.8061           | -132.8049         | -0.033                 |
|                     | Benzene         | 2.24       | <i>N</i> | -132.8065           | -132.8084         | 0.050                  |
|                     | Ethyl Ether     | 4.33       | <i>N</i> | -132.8087           | -132.8237         | 0.406                  |
|                     | Chloroform      | 4.90       | <i>N</i> | -132.8090           | -132.8256         | 0.450                  |
|                     | Tetrahydrofuran | 7.58       | <i>N</i> | -132.8099           | -132.8308         | 0.569                  |
|                     | Acetone         | 20.70      | <i>N</i> | -132.8110           | -132.8370         | 0.707                  |
|                     | Ethanol         | 24.55      | <i>N</i> | -132.8111           | -132.8376         | 0.720                  |
|                     | Acetonitrile    | 36.64      | <i>N</i> | -132.8113           | -132.8386         | 0.742                  |
|                     | Water           | 78.39      | <i>N</i> | -132.8115           | -132.8397         | 0.767                  |

| Species                   | Media           | $\epsilon$ | type     | $E(\text{neutral})$ | $E(\text{anion})$ | $\Delta E / \text{eV}$ |
|---------------------------|-----------------|------------|----------|---------------------|-------------------|------------------------|
| <b>tetrafluorethylene</b> | Argon           | 1.43       | <i>N</i> | -475.5379           | -475.5124         | -0.696                 |
|                           | Heptane         | 1.92       | <i>N</i> | -475.5388           | -475.5231         | -0.429                 |
|                           | Ciclohexane     | 2.02       | <i>N</i> | -475.5391           | -475.5247         | -0.392                 |
|                           | Benzene         | 2.25       | <i>N</i> | -475.5395           | -475.5277         | -0.321                 |
|                           | Ethyl Ether     | 4.34       | <i>N</i> | -475.5413           | -475.5410         | -0.007                 |
|                           | Chlorobenzene   | 5.62       | <i>N</i> | -475.5418           | -475.5444         | 0.070                  |
|                           | Tetrahydrofuran | 7.58       | <i>N</i> | -475.5424           | -475.5473         | 0.132                  |
|                           | Dichloroethane  | 10.36      | <i>N</i> | -475.5429           | -475.5496         | 0.182                  |
|                           | Acetone         | 20.70      | <i>N</i> | -475.5436           | -475.5527         | 0.247                  |
|                           | Ethanol         | 24.55      | <i>N</i> | -475.5438           | -475.5532         | 0.254                  |
|                           | Acetonitrile    | 36.64      | <i>N</i> | -475.5441           | -475.5540         | 0.272                  |
|                           | Water           | 78.39      | <i>N</i> | -475.5450           | -475.5551         | 0.274                  |

### 3.5. $\Delta E$ vs. $1/\epsilon$ profiles obtained for some compounds on tables 1 and 2

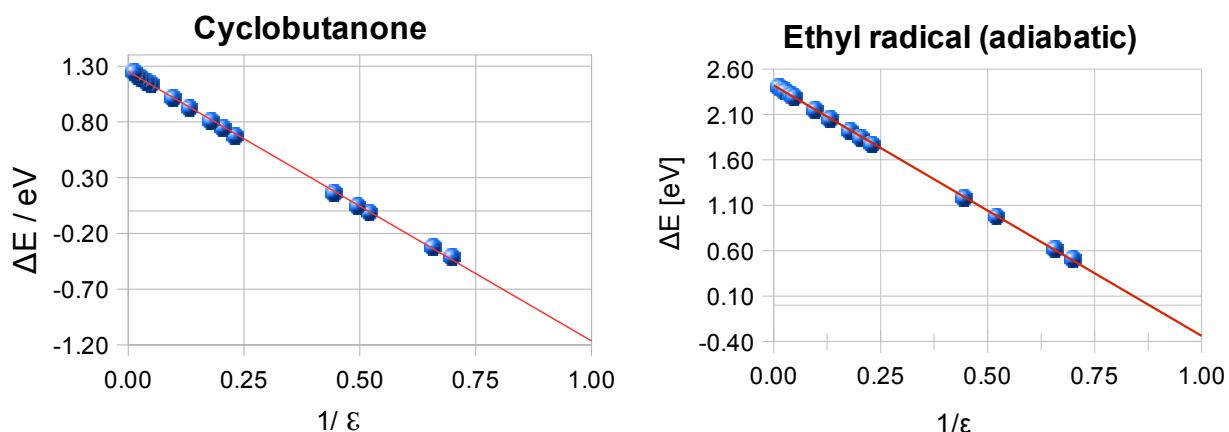

**Figure S1.**  $\Delta E$  vs.  $1/\epsilon$  profiles obtained for the compounds on table 1, cyclobutanone and ethyl radical.

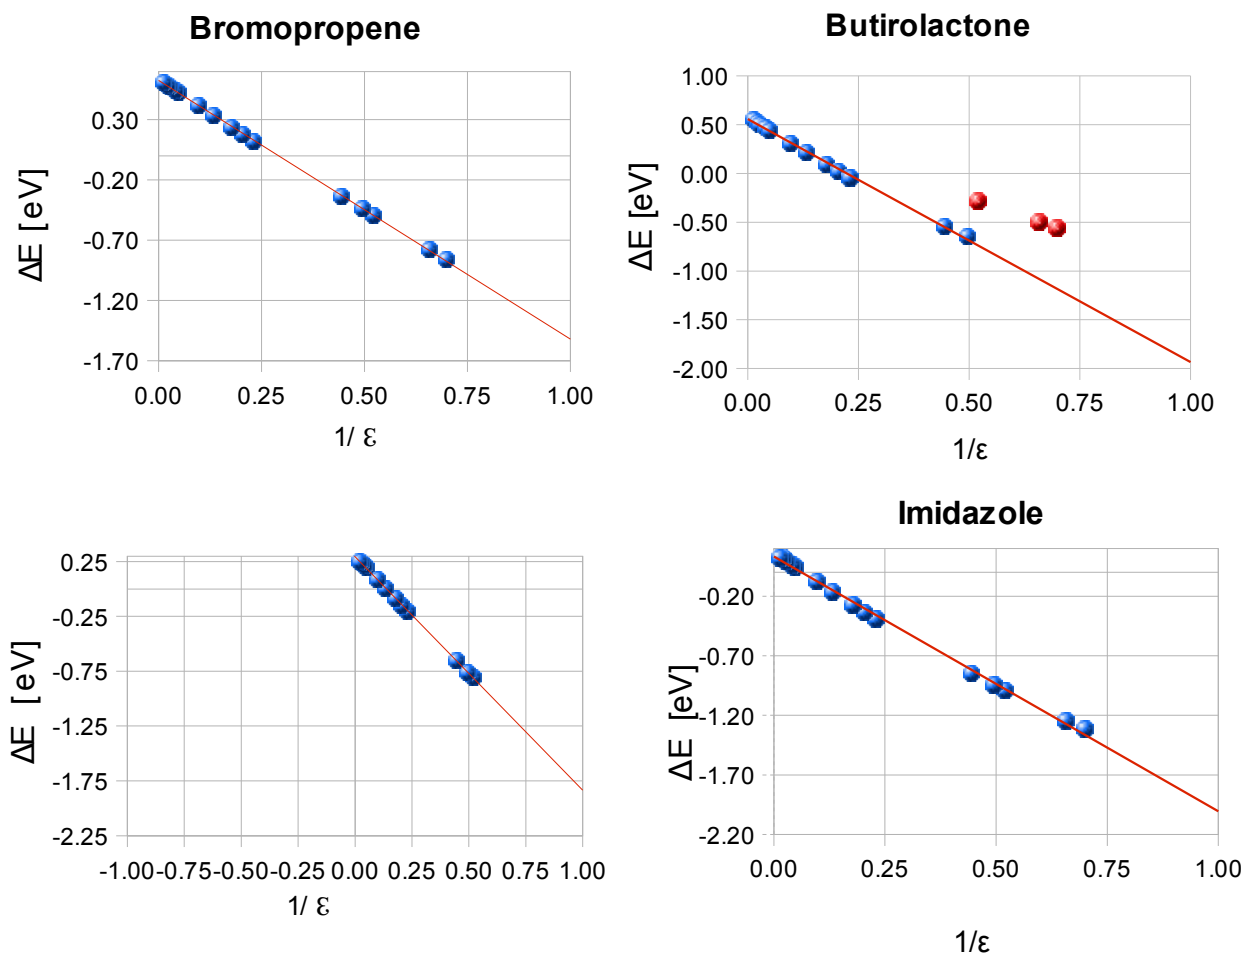

**Figure S2.**  $\Delta E$  vs.  $1/\epsilon$  profiles obtained for the compounds of table 2, bromopropene, butirolactone, 1,4-cyclohexadiene, and imidazol. ● Valence anion. ● Non valence anion.

## Part 4. Comparison of the results obtained with different functionals and basis sets

### 4.1. Table S5. Electron affinities obtained with the 6-311+G(2df,p) and Aug-CC-pVTZ basis sets

| Species                          | B3LYP/6-311+G(2df,p) |                         |                    | B3LYP/Aug-CC-pVTZ |                         |                    |                       | Experimental <sup>a,b</sup> |
|----------------------------------|----------------------|-------------------------|--------------------|-------------------|-------------------------|--------------------|-----------------------|-----------------------------|
|                                  | calc.<br>eq. 1       | anion type<br>gas phase | extrapol.<br>eq. 9 | calc.<br>eq. 1    | anion type<br>gas phase | extrapol.<br>eq. 9 | anion type<br>solvent |                             |
| Acetone                          | -1.05                | N                       | -1.46              | -0.33             | N                       | -1.20              | V                     | -1.51                       |
| Adenine                          | -0.74                | V                       | -0.79              | -0.17             | V                       | -0.86              | V                     | -0.64                       |
| cyclobutene                      | -1.42                | N                       | -2.12              | -0.51             | N                       | -2.10              | V                     | -2.00                       |
| cyclopentadiene                  | -1.19                | V                       | -1.22              | -0.47             | V                       | -1.34              | V                     | -1.18                       |
| cyclopropene                     | -1.64                | V                       | -1.70              | -0.60             | N                       | -1.67              | V                     | -1.73                       |
| Cytosine                         | -0.55                | V                       | -0.56              | -0.03             | V                       | -0.57              | V                     | -0.36                       |
| Ethylene                         | -1.71                | V                       | -1.75              | -0.72             | N                       | -1.71              | V                     | -1.78                       |
| Fluorethylene                    | -1.45                | N                       | -1.82              | -0.66             | N                       | -1.82              | V                     | -1.91                       |
| Formamide                        | -1.18                | N                       | -2.18              | -0.26             | N                       | -2.23              | V                     | -2.05                       |
| Furan                            | -1.23                | N                       | -1.75              | -0.47             | N                       | -1.71              | V                     | -1.76                       |
| Propene                          | -1.33                | N                       | -1.90              | -0.48             | N                       | -1.66              | V                     | -1.99                       |
| Thiophene                        | -1.24                | V                       | -1.29              | -0.45             | N                       | -1.28              | V                     | -1.17                       |
| Thymine                          | -0.30                | V                       | -0.34              | -0.23             | V                       | -0.48              | V                     | -0.31                       |
| <i>trans</i> -1-bromo-1-propene  | -0.30                | N                       | -1.51              | -0.39             | N                       | -1.59              | V                     | -1.30                       |
| <i>trans</i> -1-chloro-1-propene | -1.14                | N                       | -1.62              | -0.42             | N                       | -1.57              | V                     | -1.49                       |
| uracil                           | -0.27                | V                       | -0.26              | -0.04             | N                       | -0.27              | V                     | -0.21                       |
| 1,4-cyclohexadiene               | -1.10                | N                       | -1.84              | -0.40             | N                       | -0.60              | N                     | -1.75                       |
| Imidazole                        | -0.90                | N                       | -2.15              | -0.23             | N                       | -0.32              | N                     | -2.13                       |
| Propiolactone                    | -1.01                | N                       | -1.93              | -0.26             | N                       | -1.29              | N                     | -1.90                       |
| <i>trans</i> -2-butene           | -1.40                | N                       | -2.20              | -0.5              | N                       | -0.67              | N                     | -2.10                       |

a) The esa are expressed in eV. b) For experimental references see main text reference 25

4.2. Table S6. Gas phase calculation details for the compounds on Table S5

| Species                                | B3LYP/Aug-CC-pVDZ |         |             | B3LYP/Aug.CC-pVTZ//B3LYP/Aug-CC-pVDZ |             |                         |
|----------------------------------------|-------------------|---------|-------------|--------------------------------------|-------------|-------------------------|
|                                        | E(neutral)        | ZPE     | E(anion)    | E(neutral)                           | E(anion)    | Anion type<br>gas phase |
| <b>Acetone</b>                         | -193.18162        | 0.08286 | -193.16641  | -193.23586                           | -193.22381  | N                       |
| <b>Adenine</b>                         | -467.38951        | 0.11145 | -467.38046  | -467.49578                           | -467.48947  | V                       |
| <b>cyclobutene</b>                     | -155.98954        | 0.08572 | -155.96617  | -156.03247                           | -156.01369  | N                       |
| <b>cyclopentadiene</b>                 | -194.12391        | 0.09174 | -210.18191  | -194.17552                           | -194.15843  | V                       |
| <b>cyclopropene</b>                    | -116.63192        | 0.05544 | -116.60649  | -116.66601                           | -116.64412  | N                       |
| <b>Cytosine</b>                        | -394.99614        | 0.09774 | -394.99287  | -395.09115                           | -395.09016  | V                       |
| <b>Ethylene</b>                        | -78.59836         | 0.05085 | -78.57190   | -78.62374                            | -78.59725   | N                       |
| <b>Fluorethylene</b>                   | -177.84980        | 0.04377 | -177.82540  | -177.84976                           | -177.82534  | N                       |
| <b>Formamide</b>                       | -169.92537        | 0.04526 | -169.91211  | -169.97007                           | -169.96061  | N                       |
| <b>Furan</b>                           | -230.05171        | 0.06955 | -230.03035  | -230.11138                           | -230.09420  | N                       |
| <b>Propene</b>                         | -117.92087        | 0.08322 | -117.89810  | -117.95675                           | -117.93900  | N                       |
| <b>Thiophene</b>                       | -553.04370        | 0.06623 | -553.02293  | -553.09979                           | -553.08315  | N                       |
| <b>Thymine</b>                         | -454.20670        | 0.11441 | -454.19621  | -454.31773                           | -454.30932  | V                       |
| <b><i>trans</i>-1-bromo-1-propene</b>  | -2691.47850       | 0.06986 | -2691.46092 | -2691.58539                          | -2691.57124 | N                       |
| <b><i>trans</i>-1-chloro-1-propene</b> | -577.54207        | 0.07040 | -577.52285  | -577.59119                           | -577.57576  | N                       |
| <b>uracil</b>                          | -414.88426        | 0.08682 | -414.87397  | -414.98453                           | -414.98311  | N                       |
| <b>1,4-cyclohexadiene</b>              | -233.44477        | 0.12135 | -233.42653  | -233.50681                           | -233.49195  | N                       |
| <b>Imidazole</b>                       | -226.25004        | 0.07101 | -226.23844  | -226.30493                           | -226.29653  | N                       |
| <b>Propiolactone</b>                   | -267.19291        | 0.06817 | -267.17995  | -267.26135                           | -267.25171  | N                       |
| <b><i>trans</i>-2-butene</b>           | -157.24248        | 0.10704 | -157.22002  | -157.29031                           | -157.27205  | N                       |

All energies in Hartree

**4.3. Table S7. Comparison between B3PW91, B1B95 and B3LYP functionals.** Electron affinities obtained with the three functionals with 6-311+G(2df,p) basis sets

| Functional             | B3LYP (main text) |           | B3PW91     |       |           |            | B1B95      |       |           |            | Experimental <sup>b</sup> |
|------------------------|-------------------|-----------|------------|-------|-----------|------------|------------|-------|-----------|------------|---------------------------|
| Species                | calc.             | extrapol. | anion type | calc. | extrapol. | anion type | anion type | calc. | extrapol. | anion type |                           |
|                        | eq. 1             | eq. 9     | gas phase  | eq. 1 | eq. 9     | after      | gas phase  | eq. 1 | eq. 9     | after      |                           |
| 2-methyl-2-butene      | -1.12             | -2.11     | N          | -1.22 | -2.04     | V          | N          | -1.26 | -2.06     | V          | -2.24                     |
| acetone                | -1.05             | -1.46     | V          | -1.37 | -1.50     | V          | N          | -1.18 | -1.66     | V          | -1.51                     |
| 1,4-cyclohexadiene     | -1.10             | -1.85     | N          | -1.20 | -1.84     | V          | N          | -1.24 | -2.02     | V          | -1.75                     |
| <i>cis</i> -2-butene   | -1.19             | -2.42     | N          | -1.28 | -2.40     | V          | N          | -1.32 | -2.56     | V          | -2.22                     |
| Fluorethylene          | -1.45             | -1.82     | V          | -1.61 | -1.84     | V          | N          | -1.76 | -2.02     | V          | -1.91                     |
| Formamide              | -1.11             | -2.18     | N          | -0.62 | -2.24     | V          | N          | -1.25 | -2.38     | V          | -2.05                     |
| Furan                  | -1.23             | -1.75     | N          | -1.29 | -1.80     | V          | N          | -1.32 | -1.96     | V          | -1.76                     |
| Imidazol               | -0.90             | -1.93     | N          | -0.92 | -1.95     | V          | N          | -1.04 | -2.07     | V          | -2.13                     |
| Propene                | -1.33             | -1.90     | V          | -1.84 | -1.92     | V          | V          | -1.99 | -2.08     | V          | -1.99                     |
| <i>trans</i> -2-butene | -1.40             | -2.20     | N          | -1.43 | -2.45     | V          | N          | -1.54 | -2.34     | V          | -2.10                     |
| cyclopropene           | -1.14             | -1.62     | V          | -1.66 | -1.73     | V          | V          | -1.84 | -1.90     | V          | -1.49                     |
| acetylene              | -1.33             | -2.39     | N          | -1.31 | -2.16     | V          | N          | -1.48 | -2.34     | V          | -2.60                     |

a) B3PW91 and B1B95/6-311+G(2df,p); all energies in eV. b) as in main text.

**Figure S3.** Comparison between the correlations obtained with three functionals for a subset of 12 compounds: B3LYP (blue,  $y = 0.97x - 0.07$ ); B3PW91 (pink,  $y = 0.84x - 0.31$ ) and B1B95 (green,  $y = 0.98x + 0.09$ ) and an ideal prediction (red,  $y = x$ )

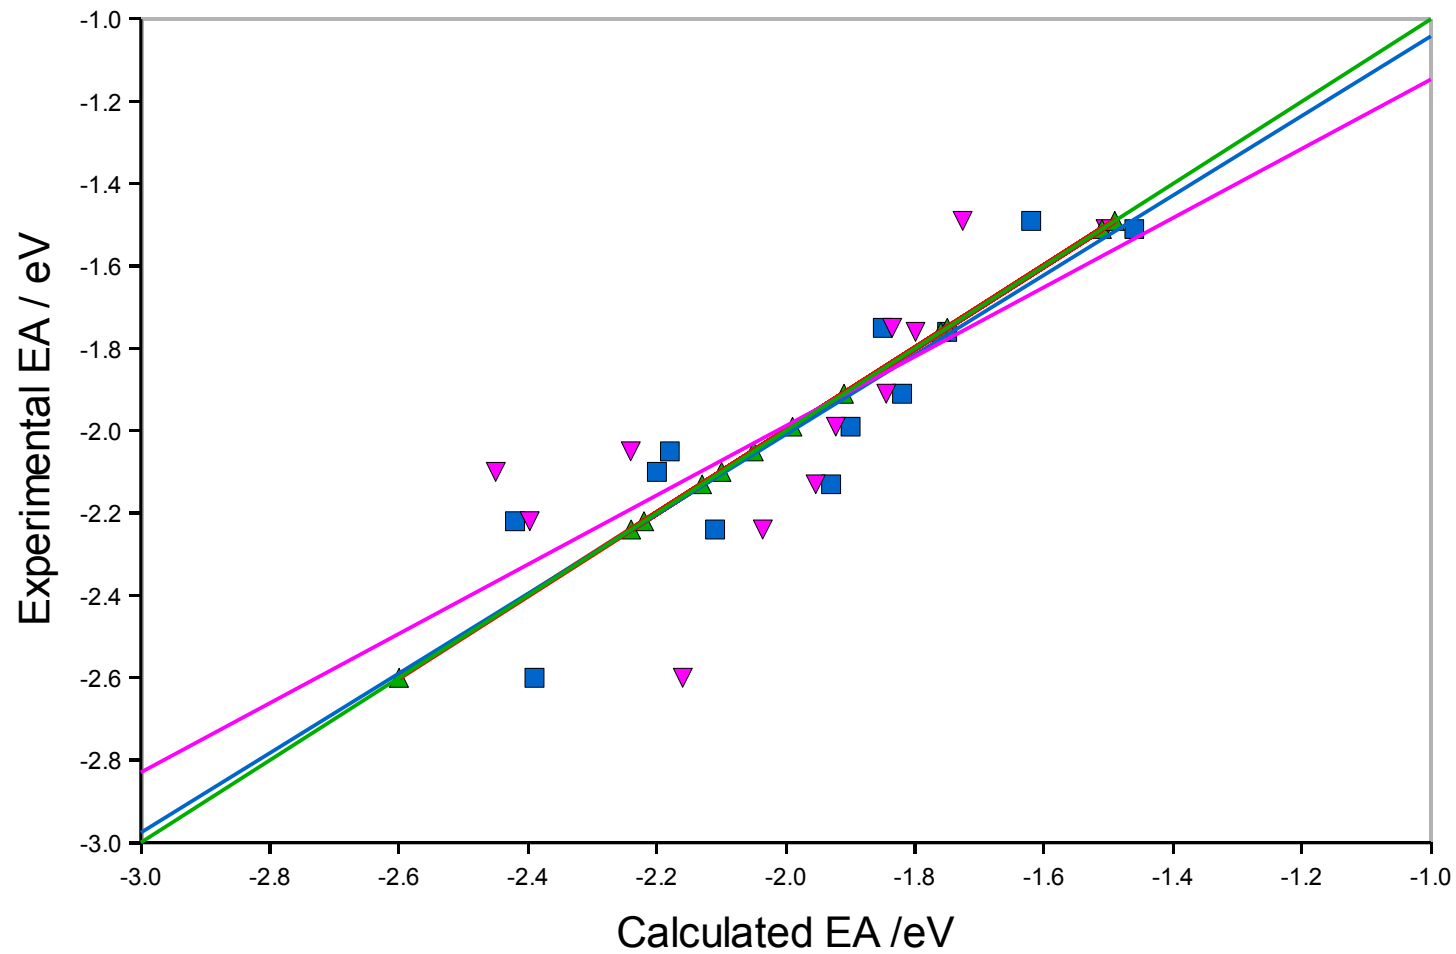

**4.4. Table S8.** Gas phase calculation details for the compounds on Table S7 with the B3PW91 and B1B95 functionals.

| functional |                    | B3PW91     |            |         |            |                               |            |
|------------|--------------------|------------|------------|---------|------------|-------------------------------|------------|
|            | Species            | Anion type | 6-31+G*    |         |            | 6-311+G(2df,p)//B3LYP/6-31+G* |            |
|            |                    |            | E(neutral) | ZPE     | E(anion)   | E(neutral)                    | E(anion)   |
| 26         | 1,4-ciclohexadiene | N          | -233.33878 | 0.12258 | -233.28335 | -233.40224                    | -233.35805 |
| 27         | 2-methyl-2-butene  | N          | -196.47321 | 0.13586 | -196.42081 | -196.52856                    | -196.48374 |
| 28         | Acetone            | V          | -193.09044 | 0.08416 | -193.04105 | -193.14831                    | -193.09774 |
| 33         | cis-2-butene       | N          | -157.17046 | 0.10852 | -157.11369 | -157.21554                    | -157.16844 |
| 37         | Fluorethylene      | N          | -177.76512 | 0.04421 | -177.70355 | -177.82057                    | -177.76570 |
| 38         | Formamide          | N          | -169.83508 | 0.04569 | -169.79023 | -169.89300                    | -169.85089 |
| 39         | Furan              | N          | -229.94182 | 0.07036 | -229.88654 | -230.00864                    | -229.96140 |
| 41         | Imidazole          | N          | -226.14031 | 0.07157 | -226.10171 | -226.20583                    | -226.17200 |
| 42         | Propene            | V          | -117.86659 | 0.08003 | -117.79512 | -117.90116                    | -117.83361 |
| 48         | trans-2-butene     | N          | -157.17251 | 0.10837 | -157.11688 | -157.21735                    | -157.16487 |
| 11         | Cyclopropene       | V          | -116.58001 | 0.05625 | -116.49658 | -116.59089                    | -116.55448 |
| 29         | acetylene          | N          | -77.29636  | 0.02688 | -77.24406  | -77.32161                     | -77.27347  |

  

| functional |                    | B1B95      |            |         |            |                               |            |
|------------|--------------------|------------|------------|---------|------------|-------------------------------|------------|
|            | Species            | Anion type | 6-31+G*    |         |            | 6-311+G(2df,p)//B3LYP/6-31+G* |            |
|            |                    |            | E(neutral) | ZPE     | E(anion)   | E(neutral)                    | E(anion)   |
| 26         | 1,4-ciclohexadiene | N          | -233.30016 | 0.12276 | -233.24152 | -233.36220                    | -233.31683 |
| 27         | 2-methyl-2-butene  | N          | -196.41956 | 0.13588 | -196.36321 | -196.47345                    | -196.42709 |
| 28         | Acetone            | N          | -193.06908 | 0.08427 | -193.01627 | -193.12617                    | -193.06953 |
| 33         | cis-2-butene       | N          | -157.12761 | 0.10851 | -157.06721 | -157.17145                    | -157.12309 |
| 37         | Fluorethylene      | N          | -177.76907 | 0.04430 | -177.70150 | -177.82411                    | -177.76633 |
| 38         | Formamide          | N          | -169.83501 | 0.04575 | -169.78620 | -169.89237                    | -169.84628 |
| 39         | Furan              | N          | -229.93885 | 0.07058 | -229.88061 | -230.00531                    | -229.95693 |
| 41         | Imidazole          | N          | -226.13549 | 0.07181 | -226.09242 | -226.20052                    | -226.16244 |
| 42         | Propene            | V          | -117.83471 | 0.08016 | -117.75726 | -117.86835                    | -117.79499 |
| 48         | trans-2-butene     | N          | -157.12948 | 0.10857 | -157.06876 | -157.17300                    | -157.11638 |
| 11         | Cyclopropene       | V          | -116.56472 | 0.05644 | -116.49459 | -116.59748                    | -116.52978 |
| 29         | acetylene          | N          | -77.29031  | 0.02696 | -77.23136  | -77.31513                     | -77.26084  |

All energies in Hartree



## Part 5. TD-DFT Calculation details and summary of results obtained with the PBE0 functional

### 5.1. Table S9. TD-DFT calculation details for the compounds on Table 3 with the B3LYP functional

|    | Species                   | Anion Type | B3LYP/6-311+G(2df,p)//B3LYP/6-31+G* |              | Root N <sup>o</sup> <sup>a</sup> | Calc.EA [eV] | Exp. EA [eV] |
|----|---------------------------|------------|-------------------------------------|--------------|----------------------------------|--------------|--------------|
|    |                           |            | E(neutral)                          | E(anion)     |                                  |              |              |
| 26 | 1,4-Cyclohexadiene        | N          | -233.4951                           | -233.4548    | 3                                | -1.63        | -1.75        |
| 27 | 2-methyl-2-butene         | N          | -196.6068                           | -196.5657    | 3                                | -1.77        | -2.24        |
| 28 | acetic acid               | N          | -229.1754                           | -229.1379    | 2                                | -1.76        | -1.80        |
| 29 | Acetone                   | N          | -193.2267                           | -193.1882    | 1                                | -1.07        | -1.51        |
| 30 | Acetylene                 | N          | -77.3602                            | -77.3115     | 2                                | -2.02        | -2.60        |
| 31 | Allene                    | N          | -116.7017                           | -116.6515    | 2                                | -1.57        | -1.88        |
| 32 | Butyrolactone             | N          | -306.6008                           | -306.5656    | 3                                | -1.62        | -1.93        |
| 33 | cis-1-bromo-1-propene     | N          | -2691.4952                          | -2691.4580   | 2                                | -1.48        | -1.49        |
| 34 | cis-1,2-difluorethylene   | N          | -277.1563                           | -277.1144    | 1                                | -1.84        | -2.18        |
| 35 | cis-2-butene              | N          | -157.2778                           | -157.2341    | 3                                | -1.94        | -2.22        |
| 36 | Cyclobutene               | N          | -156.0244                           | -155.9721    | 3                                | -1.86        | -2.00        |
| 37 | Cyclopentene              | N          | -195.3905                           | -195.3443    | 5                                | -1.97        | -2.14        |
| 38 | di-tert-butyl-peroxide    | N          | -466.2245                           | -466.1880    | 7                                | -1.97        | -2.00        |
| 39 | Ethylene Carbonate        | N          | -342.5234                           | -342.4911    | 4                                | -2.16        | -2.93        |
| 40 | Fluorethylene             | N          | -177.8931                           | -177.8355    | 1                                | -1.74        | -1.91        |
| 41 | Formamide                 | N          | -169.9624                           | -169.9215    | 2                                | -1.91        | -2.05        |
| 42 | Furan                     | N          | -230.1010                           | -230.0560    | 1                                | -1.58        | -1.76        |
| 43 | Guanine                   | N          | -542.7433                           | -542.7286    | 2                                | -0.83        | -1.40        |
| 44 | Imidazole                 | N          | -226.2950                           | -226.2620    | 2                                | -1.76        | -2.13        |
| 45 | Propene                   | N          | -117.9509                           | -117.9020    | 1                                | -1.70        | -1.99        |
| 46 | propine                   | N          | -116.6987                           | -116.6550    | 5                                | -2.67        | -2.80        |
| 47 | Propiolactone             | N          | -267.2501                           | -267.2128    | 1                                | -1.43        | -1.90        |
| 48 | Pyrrrole                  | N          | -210.2417                           | -210.2060    | 4                                | -2.09        | -2.38        |
| 49 | tetramethylethylene       | N          | -235.9288                           | -235.8889    | 5                                | -2.04        | -2.27        |
| 50 | trans-1-bromo-1-propene   | N          | -2691.4935                          | -2691.4592   | 2                                | -1.31        | -1.30        |
| 51 | trans-1-chloro-1-propene  | N          | -577.5792                           | -577.5373    | 1                                | -1.31        | -1.49        |
| 52 | trans-1,2-difluorethylene | N          | -277.1563                           | -277.1144    | 1                                | -1.42        | -1.84        |
| 53 | trans-2-butene            | N          | -157.2815                           | -157.2301    | 3                                | -2.02        | -2.10        |
| 54 | trifluorethylene          | N          | -376.4265                           | -376.3837    | 2                                | -1.96        | -2.40        |
| 55 | vinyl ether               | N          | -193.1841                           | -193.1381    | 1                                | -1.59        | -2.30        |
| 56 | 2-butine                  | N          | -156.0349                           | -155.9925    | 8                                | -3.24        | -3.43        |
| 57 | acetonitrile              | N          | -132.8024                           | -132.7701    | 4                                | -2.42        | -2.82        |
| 58 | dimethylformamide         | N          | -248.6018                           | S33-248.5665 | 5                                | -2.31        | -2.40        |
| 59 | ethyl isocyanate          | N          | -247.3955                           | -247.3642    | 8                                | -2.94        | -2.63        |
| 60 | tetrafluoroethylene       | N          | -475.6918                           | -475.6504    | 4                                | -2.95        | -3.00        |

All energies in Hartrees

## 5.2. Table S10. TD-DFT calculation details for the compounds on Table 3 with the PBE0 functional

| Species                              | Anion Type | PBE1/6-311+G(2df,p)//PBE/6-31+G* |            | Root N <sup>o a</sup> | Calc.EA [eV] | Exp. EA [eV] |
|--------------------------------------|------------|----------------------------------|------------|-----------------------|--------------|--------------|
|                                      |            | E(neutral)                       | E(anion)   |                       |              |              |
| 18 oxazole                           | N          | -245.8746                        | -245.8300  | 1                     | -1.34        | -1.44        |
| 26 1,4-Cyclohexadiene                | N          | -233.1999                        | -233.1560  | 4                     | -1.76        | -1.75        |
| 27 2-methyl-2-butene                 | N          | -196.3466                        | -196.3020  | 3                     | -1.82        | -2.24        |
| 28 acetic acid                       | N          | -228.9166                        | -228.8752  | 2                     | -1.79        | -1.80        |
| 29 Acetone <sup>b</sup>              | V          | -192.9912                        | -192.9387  | -                     | -1.43        | -1.51        |
| 30 Acetylene                         | N          | -77.2517                         | -77.2018   | 2                     | -2.12        | -2.60        |
| 31 Allene                            | N          | -116.5431                        | -116.4835  | 2                     | -1.62        | -1.88        |
| 32 Butyrolactone                     | N          | -266.9508                        | -266.9118  | 2                     | -1.61        | -1.93        |
| 33 <i>cis</i> -1-bromo-1-propene     | N          | -2691.01                         | -2690.9501 | 3                     | -1.58        | -1.49        |
| 34 <i>cis</i> -1,2-difluorethylene   | N          | -276.8670                        | -276.8219  | 2                     | -2.03        | -2.18        |
| 35 <i>cis</i> -2-butene              | N          | -157.0670                        | -157.0199  | 4                     | -2.08        | -2.22        |
| 36 Cyclobutene                       | N          | -155.8260                        | -155.7491  | 3                     | -2.01        | -2.00        |
| 37 Cyclopentene                      | N          | -195.1428                        | -195.0935  | 5                     | -2.12        | -2.14        |
| 38 di-tert-butyl-peroxide            | N          | -465.6581                        | -465.6168  | 8                     | -2.31        | -2.00        |
| 39 Ethylene Carbonate                | N          | -342.1495                        | -342.1152  | 5                     | -2.40        | -2.93        |
| 40 Fluorethylene                     | N          | -177.6926                        | -177.6370  | 1                     | -1.78        | -1.91        |
| 41 Formamide                         | N          | -169.7671                        | -169.7242  | 2                     | -2.09        | -2.05        |
| 42 Furan                             | N          | -229.8311                        | -229.7837  | 3                     | -1.75        | -1.76        |
| 43 Guanine                           | N          | -542.1435                        | -542.1252  | 2                     | -1.03        | -1.40        |
| 44 Imidazole                         | N          | -226.0303                        | -225.9961  | 2                     | -1.89        | -2.13        |
| 45 Propene                           | N          | -117.7895                        | -117.7203  | 2                     | -1.79        | -1.99        |
| 46 propyne                           | N          | -116.5404                        | -116.4944  | 5                     | -3.13        | -2.80        |
| 47 Propiolactone                     | N          | -266.9508                        | -266.9118  | 2                     | -1.61        | -1.90        |
| 48 Pyrrole                           | N          | -209.9880                        | -209.9507  | 4                     | -2.20        | -2.38        |
| 49 tetramethylethylene               | N          | -235.6198                        | -235.5755  | 7                     | -2.04        | -2.27        |
| 50 <i>trans</i> -1-bromo-1-propene   | N          | -2691.0115                       | -2690.9727 | 3                     | -1.65        | -1.30        |
| 51 <i>trans</i> -1-chloro-1-propene  | N          | -577.2590                        | -577.1991  | 1                     | -1.44        | -1.49        |
| 52 <i>trans</i> -1,2-difluorethylene | N          | -276.8652                        | -276.8120  | 2                     | -2.01        | -1.84        |
| 53 <i>trans</i> -2-butene            | N          | -157.0704                        | -157.0168  | 3                     | -2.02        | -2.10        |
| 54 trifluorethylene                  | N          | -376.0495                        | -376.0031  | 2                     | -2.14        | -2.40        |
| 55 Methyl vinyl ether                | N          | -192.9459                        | -192.8983  | 1                     | -1.81        | -2.30        |
| 56 2-butyne                          | N          | -155.8268                        | -155.7814  | 8                     | -3.62        | -3.43        |
| 57 acetonitrile                      | N          | -132.6335                        | -132.5991  | 4                     | -2.57        | -2.82        |
| 58 dimethylformamide                 | N          | -248.3054                        | -248.2674  | 6                     | -2.44        | -2.40        |
| 59 ethyl isocyanate                  | N          | -247.1029                        | -247.0678  | 9                     | -2.94        | -2.63        |
| 60 tetrafluoroethylene               | N          | -475.2270                        | -475.1894  | 4                     | -3.02        | -3.00        |

All energies in Hartrees

<sup>a</sup> First Valence excited state found with TD-DFT used for the estimation of the EA.

<sup>b</sup> The Valence anion was the ground state, TD-DFT was not used for calculating the EA of this compound

### 5.3. Comparison of results obtained with B3LYP and PBE0 functionals for compounds with valence anion ground state (compounds on main text table1)

**Figure S4.** Comparison between the correlations of calculated EA vs. experimental EA obtained for compounds on Table 1 (main text) with PBE0 and B3LYP : B3LYP (pink,  $y = 0.95x + 0.02$ ) and PBE0 (light brown,  $y = 0.99x + 0.01$ ) and an ideal prediction (red,  $y = x$ )

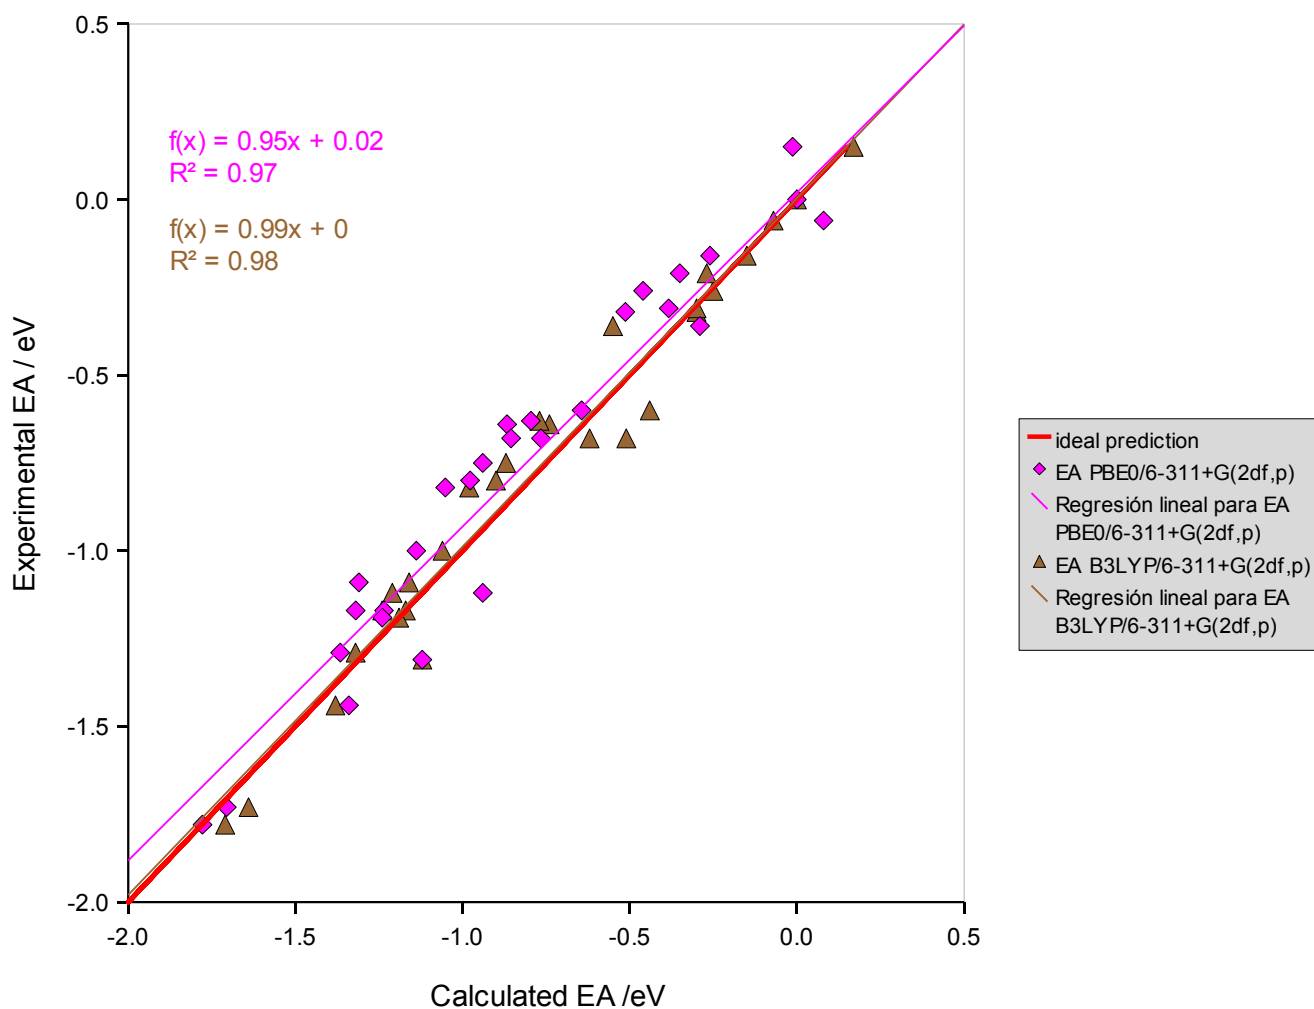

## Part 6. Prediction of EAs

**6-1 Table S11.** Gas phase calculation details for the compounds on Table 4 (main text)

|    | Species              | Anion Type | B3LYP/6-311+G(2df,p)//B3LYP/6-31+G* |           |        |
|----|----------------------|------------|-------------------------------------|-----------|--------|
|    |                      |            | E(neutral)                          | E(anion)  | ZPE*   |
| 61 | $\alpha$ -L-Alanine  | N          | -323.8700                           | -323.8353 | 0.1081 |
| 62 | $\alpha$ -L-Glycine  | N          | -284.5422                           | -284.5076 | 0.0798 |
| 63 | $\alpha$ -L-Tyrosine | N          | -630.2370                           | -630.2176 | 0.1935 |
| 64 | Ascorbic Acid        | N          | -685.0242                           | -685.0083 | 0.1505 |
| 65 | $\beta$ -Alanine     | N          | -323.8697                           | -323.8332 | 0.1088 |
| 66 | carbonyl fluoride    | N          | -313.1333                           | -313.0942 | 0.0139 |
| 67 | Succinic Acid        | N          | -457.1429                           | -457.1145 | 0.1056 |
| 68 | Urea                 | N          | -225.3585                           | -225.3244 | 0.0616 |

All energies in Hartrees. ZPE were obtained at the B3LYP/6-31+G\* level.

**Figure S5.** Spin densitie of the anions of the  $\alpha$ -L-tyrosine, the figure was made with an isodensity value of 0.0020 a.u..

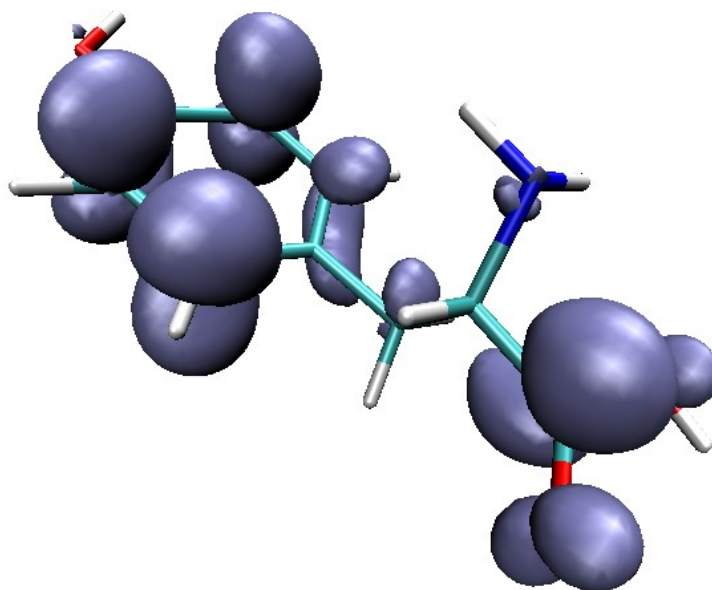

**6-2 Table S12.**  $\Delta E$  vs  $(1/\epsilon)$  extrapolation details for the compounds on Table

| Species             | Media                | $\epsilon$ | type       | $E(\text{neutral})$ | $E(\text{anion})$   | $\Delta E / \text{eV}$ |
|---------------------|----------------------|------------|------------|---------------------|---------------------|------------------------|
| $\alpha$ -L-alanine | Argon                | 1.43       | <i>N</i>   | -323.8746           | -323.8540           | -0.56                  |
|                     | Krypton              | 1.52       | <i>N</i>   | -323.8753           | -323.8567           | -0.50                  |
|                     | Heptane              | 1.92       | <i>N</i>   | -323.8778           | -323.8663           | -0.31                  |
|                     | Ciclohexane          | 2.02       | <i>N</i>   | -323.8784           | -323.8682           | -0.28                  |
|                     | Benzene              | 2.25       | <i>N</i>   | -323.8795           | -323.8719           | -0.21                  |
|                     | Ethyl Ether          | 4.34       | <i>N</i>   | -323.8849           | -323.8909           | 0.16                   |
|                     | Chloroform           | 4.9        | <i>V</i>   | -323.8857           | -323.8937           | 0.22                   |
|                     | Chlorobenzene        | 5.62       | <i>V</i>   | -323.8865           | -323.8967           | 0.28                   |
|                     | Tetrahydrofuran      | 7.58       | <i>V</i>   | -323.8880           | -323.9021           | 0.38                   |
|                     | Dichloroethane       | 10.36      | <i>V</i>   | -323.8892           | -323.9065           | 0.47                   |
|                     | Acetone              | 20.7       | <i>V</i>   | -323.8911           | -323.9130           | 0.59                   |
|                     | Ethanol              | 24.55      | <i>V</i>   | -323.8916           | -323.9141           | 0.61                   |
|                     | Acetonitrile         | 36.64      | <i>V</i>   | -323.8921           | -323.9160           | 0.65                   |
|                     | EA Linear extrap./eV |            |            | -1.73               |                     |                        |
|                     | R <sup>2</sup>       |            |            | 0.9993              |                     |                        |
|                     | Species              | Media      | $\epsilon$ | type                | $E(\text{neutral})$ | $E(\text{anion})$      |
| Ascorbic Acid       | Argon                | 1.43       | <i>N</i>   | -685.0317           | -685.0313           | -0.01                  |
|                     | Krypton              | 1.52       | <i>N</i>   | -685.0329           | -685.0346           | 0.05                   |
| Vitamin C           | Heptane              | 1.92       | <i>N</i>   | -685.0371           | -685.0465           | 0.25                   |
|                     | Ciclohexane          | 2.02       | <i>N</i>   | -685.0382           | -685.0490           | 0.30                   |
|                     | Ethyl Ether          | 4.34       | <i>V</i>   | -685.0495           | -685.0780           | 0.78                   |
|                     | Chloroform           | 4.9        | <i>V</i>   | -685.0508           | -685.0815           | 0.83                   |
|                     | Chlorobenzene        | 5.62       | <i>V</i>   | -685.0524           | -685.0850           | 0.89                   |
|                     | Tetrahydrofuran      | 7.58       | <i>V</i>   | -685.0547           | -685.0913           | 1.00                   |
|                     | Dichloroethane       | 10.36      | <i>V</i>   | -685.0570           | -685.0965           | 1.08                   |
|                     | Acetone              | 20.7       | <i>V</i>   | -685.0602           | -685.1040           | 1.19                   |
|                     | Ethanol              | 24.55      | <i>V</i>   | -685.0611           | -685.1055           | 1.21                   |
|                     | Acetonitrile         | 36.64      | <i>V</i>   | -685.0621           | -685.1077           | 1.24                   |
|                     | Dimethylsulfoxide    | 46.7       | <i>V</i>   | -685.0620           | -685.1082           | 1.26                   |
|                     | EA Linear extrap./eV |            |            | -0.99               |                     |                        |
|                     | R <sup>2</sup>       |            |            | 0.9998              |                     |                        |
|                     | Species              | Media      | $\epsilon$ | type                | $E(\text{neutral})$ | $E(\text{anion})$      |
| $\beta$ -Alanine    | Argon                | 1.43       | <i>N</i>   | -323.8743           | -323.8510           | -0.63                  |
|                     | Krypton              | 1.52       | <i>N</i>   | -323.8741           | -323.8536           | -0.56                  |
|                     | Heptane              | 1.92       | <i>N</i>   | -323.8774           | -323.8627           | -0.40                  |
|                     | Ciclohexane          | 2.02       | <i>N</i>   | -323.8780           | -323.8644           | -0.37                  |
|                     | Benzene              | 2.25       | <i>N</i>   | -323.8790           | -323.8679           | -0.30                  |
|                     | Ethyl Ether          | 4.34       | <i>V</i>   | -323.8844           | -323.8863           | 0.05                   |
|                     | Chloroform           | 4.9        | <i>V</i>   | -323.8853           | -323.8891           | 0.10                   |
|                     | Chlorobenzene        | 5.62       | <i>V</i>   | -323.8860           | -323.8921           | 0.17                   |
|                     | Dichloroethane       | 10.36      | <i>V</i>   | -323.8888           | -323.9025           | 0.37                   |
|                     | Acetone              | 20.7       | <i>V</i>   | -323.8906           | -323.9093           | 0.51                   |
|                     | Ethanol              | 24.55      | <i>V</i>   | -323.8910           | -323.9104           | 0.53                   |
|                     | Acetonitrile         | 36.64      | <i>V</i>   | -323.8915           | -323.9124           | 0.57                   |
|                     | Water                | 78.39      | <i>V</i>   | -323.8928           | -323.9149           | 0.60                   |
|                     | EA Linear extrap./eV |            |            | -1.94               |                     |                        |
|                     | R <sup>2</sup>       |            |            | 0.9989              |                     |                        |

4 (main text)

| Species           | Media                | $\epsilon$ | type | $E(\text{neutral})$ | $E(\text{anion})$ | $\Delta E / \text{eV}$ |
|-------------------|----------------------|------------|------|---------------------|-------------------|------------------------|
| Carbonyl fluoride | Argon                | 1.43       | V    | -313.1341           | -313.0966         | -1.02                  |
|                   | Krypton              | 1.52       | V    | -313.1342           | -313.1005         | -0.92                  |
|                   | Heptane              | 1.92       | V    | -313.1347           | -313.1143         | -0.56                  |
|                   | Ciclohexane          | 2.02       | V    | -313.1348           | -313.1171         | -0.48                  |
|                   | Benzene              | 2.25       | V    | -313.1350           | -313.1223         | -0.35                  |
|                   | Ethyl Ether          | 4.34       | V    | -313.1360           | -313.1454         | 0.26                   |
|                   | Chloroform           | 4.9        | V    | -313.1361           | -313.1483         | 0.33                   |
|                   | Chlorobenzene        | 5.62       | V    | -313.1363           | -313.1512         | 0.41                   |
|                   | Tetrahydrofuran      | 7.58       | V    | -313.1365           | -313.1563         | 0.54                   |
|                   | Dichloroethane       | 10.36      | V    | -313.1368           | -313.1602         | 0.64                   |
|                   | Acetone              | 20.7       | V    | -313.1371           | -313.1655         | 0.77                   |
|                   | Ethanol              | 24.55      | V    | -313.1371           | -313.1663         | 0.79                   |
|                   | Dimethylsulfoxide    | 46.7       | V    | -313.1373           | -313.1685         | 0.85                   |
|                   | Water                | 78.39      | V    | -313.1374           | -313.1695         | 0.87                   |
|                   | EA Linear extrap./eV |            |      | -1.92               |                   |                        |
|                   | R <sup>2</sup>       |            |      | 1.0000              |                   |                        |

| Species             | Media                | $\epsilon$ | type | $E(\text{neutral})$ | $E(\text{anion})$ | $\Delta E / \text{eV}$ |
|---------------------|----------------------|------------|------|---------------------|-------------------|------------------------|
| $\alpha$ -L-Glycine | Argon                | 1.43       | N    | -284.5464           | -284.5284         | -0.49                  |
|                     | Krypton              | 1.52       | N    | -284.5470           | -284.5313         | -0.43                  |
|                     | Heptane              | 1.92       | N    | -284.5495           | -284.5414         | -0.22                  |
|                     | Ciclohexane          | 2.02       | N    | -284.5500           | -284.5434         | -0.18                  |
|                     | Benzene              | 2.25       | N    | -284.5510           | -284.5471         | -0.11                  |
|                     | Ethyl Ether          | 4.34       | V    | -284.5561           | -284.5503         | -0.16                  |
|                     | Chloroform           | 4.9        | V    | -284.5568           | -284.5534         | -0.09                  |
|                     | Chlorobenzene        | 5.62       | V    | -284.5576           | -284.5564         | -0.03                  |
|                     | Tetrahydrofuran      | 7.58       | V    | -284.5590           | -284.5619         | 0.08                   |
|                     | Dichloroethane       | 10.36      | V    | -284.5601           | -284.5662         | 0.17                   |
|                     | Acetone              | 20.7       | V    | -284.5617           | -284.5723         | 0.29                   |
|                     | Ethanol              | 24.55      | V    | -284.5620           | -284.5733         | 0.31                   |
|                     | Acetonitrile         | 36.64      | V    | -284.5625           | -284.5750         | 0.34                   |
|                     | Water                | 78.39      | V    | -284.5631           | -284.5771         | 0.38                   |
|                     | EA Linear extrap./eV |            |      | -2.05               |                   |                        |
|                     | R <sup>2</sup>       |            |      | 0.9999              |                   |                        |

| Species       | Media                | $\epsilon$ | type     | $E(\text{neutral})$ | $E(\text{anion})$ | $\Delta E / \text{eV}$ |
|---------------|----------------------|------------|----------|---------------------|-------------------|------------------------|
| Succinic Acid | Argon                | 1.43       | <i>N</i> | -457.1487           | -457.1342         | -0.40                  |
|               | Ciclohexane          | 2.02       | <i>N</i> | -457.1536           | -457.1486         | -0.14                  |
|               | Benzene              | 2.25       | <i>N</i> | -457.1550           | -457.1523         | -0.07                  |
|               | Ethyl Ether          | 4.34       | <i>V</i> | -457.1620           | -457.1672         | 0.14                   |
|               | Chloroform           | 4.9        | <i>V</i> | -457.1630           | -457.1703         | 0.20                   |
|               | Chlorobenzene        | 5.62       | <i>V</i> | -457.1640           | -457.1732         | 0.25                   |
|               | Dichloroethane       | 10.36      | <i>V</i> | -457.1675           | -457.1828         | 0.42                   |
|               | Acetone              | 20.7       | <i>V</i> | -457.1698           | -457.1887         | 0.52                   |
|               | Ethanol              | 24.55      | <i>V</i> | -457.1701           | -457.1887         | 0.50                   |
|               | Acetonitrile         | 36.64      | <i>V</i> | -457.1708           | -457.1914         | 0.56                   |
|               | Water                | 78.39      | <i>V</i> | -457.1717           | -457.1936         | 0.60                   |
|               | EA Linear extrap./eV |            |          | -1.43               |                   |                        |
|               | R <sup>2</sup>       |            |          | 0.9967              |                   |                        |

| Species              | Media                | $\epsilon$ | type     | $E(\text{neutral})$ | $E(\text{anion})$ | $\Delta E / \text{eV}$ |
|----------------------|----------------------|------------|----------|---------------------|-------------------|------------------------|
| $\alpha$ -L-Tyrosine | Argon                | 1.43       | <i>N</i> | -630.2435           | -630.2372         | -0.17                  |
|                      | Krypton              | 1.52       | <i>N</i> | -630.2446           | -630.2402         | -0.12                  |
|                      | Heptane              | 1.92       | <i>N</i> | -630.2483           | -630.2508         | 0.07                   |
|                      | Ciclohexane          | 2.02       | <i>N</i> | -630.2492           | -630.2532         | 0.11                   |
|                      | Benzene              | 2.25       | <i>N</i> | -630.2508           | -630.2574         | 0.18                   |
|                      | Ethyl Ether          | 4.34       | <i>V</i> | -630.2592           | -630.2780         | 0.51                   |
|                      | Chloroform           | 4.9        | <i>V</i> | -630.2605           | -630.2809         | 0.56                   |
|                      | Chlorobenzene        | 5.62       | <i>V</i> | -630.2617           | -630.2836         | 0.60                   |
|                      | Tetrahydrofuran      | 7.58       | <i>V</i> | -630.2641           | -630.2888         | 0.67                   |
|                      | Dichloroethane       | 10.36      | <i>V</i> | -630.2661           | -630.2930         | 0.73                   |
|                      | Acetone              | 20.7       | <i>V</i> | -630.2690           | -630.2990         | 0.81                   |
|                      | Ethanol              | 24.55      | <i>V</i> | -630.2696           | -630.3000         | 0.83                   |
|                      | Dimethylsulfoxide    | 46.7       | <i>V</i> | -630.2706           | -630.3023         | 0.86                   |
|                      | Water                | 78.39      | <i>V</i> | -630.2718           | -630.3041         | 0.88                   |
|                      | EA Linear extrap./eV |            |          | -0.78               |                   |                        |
| R <sup>2</sup>       |                      |            | 0.9998   |                     |                   |                        |

## Part 7. XYZ Coordinates

List of XYZ coordinates of the optimized geometries at the B3LYP/6-31+G\* level of theory.

Compounds of table 1

1,1-dichloroethylene

|    |           |          |           |
|----|-----------|----------|-----------|
| C  | 0.000000  | 0.000000 | 0.424331  |
| C  | 0.000000  | 0.000000 | 1.755535  |
| Cl | 1.466514  | 0.000000 | -0.520397 |
| Cl | -1.466514 | 0.000000 | -0.520397 |
| H  | -0.933552 | 0.000000 | 2.307153  |
| H  | 0.933552  | 0.000000 | 2.307153  |

2-bromo-1-propene

|    |           |           |           |
|----|-----------|-----------|-----------|
| C  | -0.754206 | -0.404361 | -1.829334 |
| C  | -0.782092 | -0.200964 | -0.513357 |
| Br | 0.845907  | 0.196496  | 0.423497  |
| C  | -1.992703 | -0.247261 | 0.368158  |
| H  | -1.679247 | -0.629299 | -2.355523 |
| H  | 0.158099  | -0.356632 | -2.413557 |
| H  | -1.881658 | -1.010853 | 1.147300  |
| H  | -2.146995 | 0.713660  | 0.873377  |
| H  | -2.882938 | -0.478725 | -0.226786 |

3-bromo-1-propene

|    |           |           |           |
|----|-----------|-----------|-----------|
| C  | -1.080650 | -1.011539 | -2.299309 |
| C  | -1.083193 | -1.044432 | -0.962238 |
| C  | 0.158939  | -1.059269 | -0.145479 |
| Br | 0.429452  | 0.706348  | 0.761983  |
| H  | -2.005577 | -1.005746 | -2.869628 |
| H  | -2.024474 | -1.041752 | -0.414496 |
| H  | -0.154110 | -0.994135 | -2.870140 |
| H  | 1.056040  | -1.210052 | -0.746078 |
| H  | 0.126741  | -1.779044 | 0.673115  |

Adenine

|   |           |           |           |
|---|-----------|-----------|-----------|
| N | -1.007247 | -0.001424 | -1.638847 |
| C | -1.007862 | 0.000589  | -0.299143 |
| C | 0.113073  | 0.004153  | 0.538716  |
| C | 1.367402  | 0.005998  | -0.108225 |
| N | 1.401984  | -0.001743 | -1.452512 |
| C | 0.237666  | -0.003200 | -2.125690 |
| N | -0.256531 | -0.000812 | 1.875041  |
| C | -1.567700 | -0.005789 | 1.843998  |
| N | -2.083465 | -0.004460 | 0.562299  |
| N | 2.538727  | 0.040613  | 0.577407  |
| H | 0.327195  | -0.008126 | -3.209227 |
| H | -3.058143 | -0.007416 | 0.293029  |
| H | -2.212655 | -0.010631 | 2.713099  |
| H | 3.397768  | -0.102052 | 0.064968  |
| H | 2.536076  | -0.107502 | 1.576472  |

Bromoethylene

|   |          |          |           |
|---|----------|----------|-----------|
| C | 1.094238 | 0.000000 | -1.843221 |
| C | 1.090113 | 0.000000 | -0.514336 |
| H | 2.044073 | 0.000000 | -2.372709 |
| H | 1.986242 | 0.000000 | 0.095740  |



|    |           |          |           |
|----|-----------|----------|-----------|
| H  | 0.183702  | 0.000000 | -2.434488 |
| Br | -0.494861 | 0.000000 | 0.538766  |

Chloroethylene

|    |           |          |           |
|----|-----------|----------|-----------|
| C  | -0.747423 | 0.000000 | -1.494215 |
| C  | -0.747294 | 0.000000 | -0.164293 |
| H  | 0.167252  | 0.000000 | -2.078947 |
| H  | -1.695020 | 0.000000 | -2.025858 |
| H  | -1.644914 | 0.000000 | 0.444503  |
| Cl | 0.714175  | 0.000000 | 0.800668  |

cis-1-bromo-2-butene

|    |           |           |           |
|----|-----------|-----------|-----------|
| C  | -2.109721 | 1.044360  | -1.648316 |
| C  | -2.063533 | 1.138679  | -0.150057 |
| C  | -0.981158 | 1.082435  | 0.643852  |
| C  | 0.423061  | 0.949457  | 0.179788  |
| Br | 1.064833  | -0.955087 | 0.284951  |
| H  | -3.032350 | 1.253754  | 0.337186  |
| H  | -1.121374 | 1.118721  | 1.722745  |
| H  | 1.124446  | 1.490829  | 0.814181  |
| H  | 0.577186  | 1.229959  | -0.860130 |
| H  | -2.561517 | 1.946308  | -2.083177 |
| H  | -1.126258 | 0.900463  | -2.103569 |
| H  | -2.741195 | 0.198419  | -1.952125 |

cis-1,2-dichloroethylene

|    |           |          |           |
|----|-----------|----------|-----------|
| C  | 0.961157  | 0.000000 | -0.666673 |
| C  | 0.961157  | 0.000000 | 0.666673  |
| H  | 1.895844  | 0.000000 | -1.216310 |
| Cl | -0.450752 | 0.000000 | -1.672693 |
| Cl | -0.450752 | 0.000000 | 1.672693  |
| H  | 1.895844  | 0.000000 | 1.216310  |

cyclobutanone

|   |           |           |           |
|---|-----------|-----------|-----------|
| C | -0.910078 | -0.343885 | -1.117393 |
| C | -1.111871 | 0.161162  | 0.346756  |
| C | 0.416122  | 0.158551  | 0.510050  |
| C | 0.639629  | -0.348764 | -0.923638 |
| O | 1.156717  | 0.446566  | 1.417310  |
| H | 1.207489  | 0.346942  | -1.552646 |
| H | 1.128816  | -1.329101 | -0.968835 |
| H | -1.623959 | -0.530065 | 1.026764  |
| H | -1.565830 | 1.152702  | 0.459858  |
| H | -1.261676 | 0.353096  | -1.882697 |
| H | -1.341394 | -1.328485 | -1.315574 |

cyclopentadiene

|   |           |           |           |
|---|-----------|-----------|-----------|
| C | -0.978666 | 0.000000  | -0.754212 |
| C | -1.059467 | 0.000000  | 0.595450  |
| C | 0.333475  | 0.000000  | 1.172676  |
| C | 1.214160  | 0.000000  | -0.051200 |
| C | 0.435351  | 0.000000  | -1.156417 |
| H | -1.964188 | 0.000000  | 1.193598  |
| H | 2.298247  | 0.000000  | -0.018668 |
| H | 0.780629  | 0.000000  | -2.185688 |
| H | -1.813921 | 0.000000  | -1.447720 |
| H | 0.515057  | 0.879273  | 1.810347  |
| H | 0.515057  | -0.879273 | 1.810347  |

cyclopropene

|   |           |           |           |
|---|-----------|-----------|-----------|
| C | -0.475840 | 0.666900  | -0.038231 |
| C | -0.527405 | -0.626566 | 0.036760  |
| C | 0.862921  | -0.035000 | 0.001283  |
| H | 1.464589  | -0.004688 | 0.914888  |
| H | 1.463549  | -0.111572 | -0.910427 |
| H | -1.107023 | -1.536487 | 0.090191  |
| H | -0.979163 | 1.620947  | -0.093664 |

cytosine

Neutral

|   |           |           |           |
|---|-----------|-----------|-----------|
| C | -1.117194 | -0.002827 | -1.125609 |
| C | -1.117194 | -0.002827 | 0.315847  |
| N | -0.021628 | -0.002827 | 1.053926  |
| C | 1.214334  | 0.004834  | 0.460014  |
| N | 1.230080  | 0.004092  | -0.967084 |
| C | 0.104770  | -0.000210 | -1.724579 |
| N | -2.308670 | 0.027573  | 0.978436  |
| O | 2.286410  | 0.008291  | 1.050315  |
| H | 2.151271  | 0.005911  | -1.387962 |
| H | 0.238874  | 0.001899  | -2.801901 |
| H | -2.032303 | 0.003587  | -1.705563 |
| H | -3.173387 | -0.175653 | 0.500040  |
| H | -2.282501 | -0.097767 | 1.981876  |

Optimized Anion

|   |           |           |           |
|---|-----------|-----------|-----------|
| C | -1.129611 | -0.025173 | -1.113356 |
| C | -1.129611 | -0.025173 | 0.272582  |
| N | -0.011308 | -0.025173 | 1.063067  |
| C | 1.197912  | 0.042105  | 0.456102  |
| N | 1.241526  | 0.192221  | -0.954117 |
| C | 0.116341  | -0.039379 | -1.787415 |
| N | -2.348295 | -0.027828 | 1.016994  |
| O | 2.296438  | 0.002168  | 1.052520  |
| H | 2.166089  | 0.020788  | -1.325877 |
| H | 0.222041  | 0.278314  | -2.823048 |
| H | -2.059452 | -0.036969 | -1.678842 |
| H | -3.058208 | -0.622160 | 0.596167  |
| H | -2.145613 | -0.346141 | 1.962359  |

ethyl radical

Neutral

|   |           |           |           |
|---|-----------|-----------|-----------|
| C | -0.060838 | -0.692711 | 0.007584  |
| C | 0.048066  | 0.794612  | -0.010273 |
| H | 0.092183  | 1.362891  | 0.915228  |
| H | 0.226656  | 1.330787  | -0.938745 |
| H | -0.521417 | -1.078885 | -0.910768 |
| H | 0.929212  | -1.178014 | 0.087761  |
| H | -0.650001 | -1.048185 | 0.862661  |

Optimized Anion

|   |           |           |           |
|---|-----------|-----------|-----------|
| C | -0.688405 | 0.000003  | 0.068601  |
| C | 0.819903  | -0.000004 | -0.206589 |
| H | 1.304875  | 0.893353  | 0.235175  |
| H | 1.304866  | -0.893366 | 0.235175  |
| H | -1.174774 | -0.878287 | -0.390982 |
| H | -1.049189 | 0.000005  | 1.139546  |
| H | -1.174765 | 0.878299  | -0.390982 |

ethylene

|   |           |          |           |
|---|-----------|----------|-----------|
| C | 0.000000  | 0.000000 | -0.667301 |
| C | 0.000000  | 0.000000 | 0.667301  |
| H | 0.923951  | 0.000000 | -1.241095 |
| H | -0.923951 | 0.000000 | -1.241095 |
| H | -0.923951 | 0.000000 | 1.241095  |
| H | 0.923951  | 0.000000 | 1.241095  |

isopropil radical

Neutral

|   |           |           |           |
|---|-----------|-----------|-----------|
| C | 1.300156  | -0.198373 | 0.003054  |
| C | 0.000000  | 0.535303  | -0.045419 |
| C | -1.300156 | -0.198373 | 0.003055  |
| H | 0.000000  | 1.612880  | 0.103380  |
| H | 2.149516  | 0.455567  | -0.225218 |
| H | 1.491047  | -0.639569 | 0.999587  |
| H | 1.316958  | -1.038107 | -0.708127 |
| H | -2.149517 | 0.455568  | -0.225211 |
| H | -1.316960 | -1.038103 | -0.708133 |
| H | -1.491043 | -0.639576 | 0.999585  |

Neutral in acetone

|   |           |           |           |
|---|-----------|-----------|-----------|
| C | 1.298517  | -0.198986 | 0.000208  |
| C | 0.000015  | 0.539641  | -0.002309 |
| C | -1.298532 | -0.198919 | 0.000627  |
| H | 0.000050  | 1.628331  | 0.000370  |
| H | 2.158650  | 0.479364  | -0.019704 |
| H | 1.402200  | -0.842811 | 0.891390  |
| H | 1.385923  | -0.876040 | -0.867325 |
| H | -2.158688 | 0.479683  | 0.003386  |
| H | -1.396320 | -0.858766 | -0.879181 |
| H | -1.391817 | -0.860176 | 0.879909  |

Neutral in THF

|   |           |           |           |
|---|-----------|-----------|-----------|
| C | 1.269082  | -0.196774 | -0.000127 |
| C | 0.000076  | 0.525556  | -0.000210 |
| C | -1.269092 | -0.196844 | 0.000017  |
| H | -0.000206 | 1.618565  | 0.000218  |
| H | 2.140426  | 0.502263  | -0.023949 |
| H | 1.354620  | -0.834905 | 0.917247  |
| H | 1.335280  | -0.872700 | -0.891513 |
| H | -2.140438 | 0.502637  | 0.002940  |
| H | -1.346414 | -0.851502 | -0.906257 |
| H | -1.343666 | -0.855989 | 0.903236  |

Anion

|   |           |           |           |
|---|-----------|-----------|-----------|
| C | 1.246097  | -0.203186 | 0.048882  |
| C | 0.000000  | 0.591292  | -0.293485 |
| C | -1.246097 | -0.203186 | 0.048882  |
| H | 0.000000  | 1.530826  | 0.292504  |
| H | 2.163393  | 0.401718  | -0.040323 |
| H | 1.257546  | -0.647964 | 1.098304  |
| H | 1.385795  | -1.073925 | -0.617071 |
| H | -2.163393 | 0.401718  | -0.040323 |
| H | -1.385795 | -1.073925 | -0.617071 |
| H | -1.257546 | -0.647964 | 1.098304  |

Anion in acetone

|   |          |           |           |
|---|----------|-----------|-----------|
| C | 0.039449 | -0.204481 | 1.247800  |
| C | 0.040250 | 0.678960  | -0.000011 |
| C | 0.039608 | -0.204522 | -1.247771 |

|   |           |           |           |
|---|-----------|-----------|-----------|
| H | -0.912520 | 1.246646  | -0.000041 |
| H | -0.103642 | 0.374046  | 2.173835  |
| H | -0.755950 | -0.998872 | 1.244652  |
| H | 0.989624  | -0.751691 | 1.370210  |
| H | -0.103971 | 0.374025  | -2.173728 |
| H | 0.989928  | -0.751379 | -1.370485 |
| H | -0.755571 | -0.999126 | -1.244462 |

Anion in THF

|   |           |           |           |
|---|-----------|-----------|-----------|
| C | 1.246116  | -0.206151 | 0.049497  |
| C | 0.000000  | 0.603365  | -0.303402 |
| C | -1.246116 | -0.206151 | 0.049497  |
| H | 0.000000  | 1.505942  | 0.341324  |
| H | 2.171838  | 0.383271  | -0.044487 |
| H | 1.242813  | -0.625809 | 1.094926  |
| H | 1.372332  | -1.083619 | -0.607876 |
| H | -2.171838 | 0.383271  | -0.044487 |
| H | -1.372332 | -1.083619 | -0.607876 |
| H | -1.242813 | -0.625809 | 1.094926  |

isothiazole

|   |           |          |           |
|---|-----------|----------|-----------|
| C | -1.160004 | 0.000000 | -0.434135 |
| C | -1.098625 | 0.000000 | 0.936725  |
| C | 0.261528  | 0.000000 | 1.367358  |
| N | 1.191662  | 0.000000 | 0.430603  |
| S | 0.440686  | 0.000000 | -1.072935 |
| H | -2.036945 | 0.000000 | -1.069609 |
| H | -1.957978 | 0.000000 | 1.597729  |
| H | 0.584916  | 0.000000 | 2.404932  |

oxazole

|   |           |          |           |
|---|-----------|----------|-----------|
| C | -0.947203 | 0.000000 | -0.621330 |
| C | -0.897421 | 0.000000 | 0.726951  |
| N | 0.431812  | 0.000000 | 1.131138  |
| C | 1.100663  | 0.000000 | 0.030670  |
| O | 0.338876  | 0.000000 | -1.088485 |
| H | -1.731153 | 0.000000 | -1.356759 |
| H | -1.708166 | 0.000000 | 1.435815  |
| H | 2.169394  | 0.000000 | -0.106893 |

t-butyl radical

Neutral

|   |           |           |           |
|---|-----------|-----------|-----------|
| C | 0.242345  | 1.468358  | 0.014339  |
| C | 0.000046  | -0.000061 | -0.159758 |
| C | 1.150128  | -0.944237 | 0.016118  |
| C | -1.392393 | -0.524077 | 0.017617  |
| H | -0.556981 | 2.069923  | -0.437823 |
| H | 0.284429  | 1.756254  | 1.083725  |
| H | 1.196918  | 1.779832  | -0.429320 |
| H | 0.945019  | -1.924954 | -0.432565 |
| H | 2.072953  | -0.550822 | -0.429629 |
| H | 1.372431  | -1.129187 | 1.085961  |
| H | -2.140255 | 0.146815  | -0.424755 |
| H | -1.515385 | -1.517483 | -0.433299 |
| H | -1.659883 | -0.630280 | 1.087815  |

Anion

|   |          |           |           |
|---|----------|-----------|-----------|
| C | 0.242345 | 1.468358  | 0.014339  |
| C | 0.000000 | 0.000000  | -0.159758 |
| C | 1.150128 | -0.944237 | 0.016118  |

|   |           |           |           |
|---|-----------|-----------|-----------|
| C | -1.392393 | -0.524077 | 0.017617  |
| H | -0.556981 | 2.069923  | -0.437823 |
| H | 0.284429  | 1.756254  | 1.083725  |
| H | 1.196918  | 1.779832  | -0.429320 |
| H | 0.945019  | -1.924954 | -0.432565 |
| H | 2.072953  | -0.550822 | -0.429629 |
| H | 1.372431  | -1.129187 | 1.085961  |
| H | -2.140255 | 0.146815  | -0.424755 |
| H | -1.515385 | -1.517483 | -0.433299 |
| H | -1.659883 | -0.630280 | 1.087815  |

thiazole

|   |           |          |           |
|---|-----------|----------|-----------|
| C | -1.175963 | 0.000000 | -0.326081 |
| C | -0.985673 | 0.000000 | 1.021687  |
| N | 0.320766  | 0.000000 | 1.439164  |
| C | 1.126959  | 0.000000 | 0.423578  |
| S | 0.347847  | 0.000000 | -1.126453 |
| H | -2.103289 | 0.000000 | -0.875070 |
| H | -1.776261 | 0.000000 | 1.758732  |
| H | 2.204886  | 0.000000 | 0.502751  |

thiophene

|   |           |          |           |
|---|-----------|----------|-----------|
| C | -1.069456 | 0.000000 | -0.996562 |
| C | -1.187464 | 0.000000 | 0.368885  |
| S | 0.365492  | 0.000000 | 1.143428  |
| C | 1.181268  | 0.000000 | -0.388269 |
| C | 0.293141  | 0.000000 | -1.432111 |
| H | -2.091594 | 0.000000 | 0.963697  |
| H | 2.262776  | 0.000000 | -0.428159 |
| H | 0.597589  | 0.000000 | -2.473647 |
| H | -1.921578 | 0.000000 | -1.668406 |

thymine

|   |           |           |           |
|---|-----------|-----------|-----------|
| C | -0.936155 | 0.034786  | -0.838790 |
| C | -0.926819 | -0.106009 | 0.622672  |
| N | 0.353024  | -0.099154 | 1.208685  |
| C | 1.579349  | 0.022636  | 0.576281  |
| N | 1.461942  | 0.149763  | -0.801267 |
| C | 0.254536  | 0.154806  | -1.472311 |
| O | -1.923284 | -0.223038 | 1.324974  |
| O | 2.653337  | 0.019582  | 1.157903  |
| C | -2.263234 | 0.036497  | -1.542560 |
| H | 0.384970  | -0.195072 | 2.218970  |
| H | 2.336204  | 0.241392  | -1.301880 |
| H | 0.330641  | 0.263075  | -2.549814 |
| H | -2.898104 | 0.852688  | -1.178813 |
| H | -2.135639 | 0.149478  | -2.624205 |
| H | -2.809322 | -0.894470 | -1.350948 |

trans-1-bromo-2-butene

|    |           |           |           |
|----|-----------|-----------|-----------|
| C  | 1.013488  | -0.941658 | -1.764565 |
| C  | 0.894848  | -0.908599 | -0.429851 |
| C  | 2.307571  | -0.923152 | -2.522889 |
| H  | 1.783521  | -0.834057 | 0.196864  |
| H  | 0.103974  | -0.994652 | -2.366985 |
| C  | -0.412122 | -0.948574 | 0.270441  |
| H  | -0.415700 | -1.609232 | 1.137681  |
| Br | -0.885268 | 0.848923  | 1.037274  |
| H  | -1.242596 | -1.192901 | -0.391914 |
| H  | 2.413733  | -1.819929 | -3.148271 |

|   |          |           |           |
|---|----------|-----------|-----------|
| H | 2.348267 | -0.059214 | -3.200524 |
| H | 3.170455 | -0.870428 | -1.850249 |

trans-1,2-dichloroethylene

|    |           |          |           |
|----|-----------|----------|-----------|
| C  | 0.000337  | 0.000000 | -0.665602 |
| C  | -0.000337 | 0.000000 | 0.665602  |
| H  | 0.898209  | 0.000000 | -1.272286 |
| Cl | -1.484014 | 0.000000 | -1.580345 |
| H  | -0.898209 | 0.000000 | 1.272286  |
| Cl | 1.484014  | 0.000000 | 1.580345  |

uracil

Neutral

|   |           |          |           |
|---|-----------|----------|-----------|
| C | -0.311907 | 0.000000 | 1.300436  |
| O | -0.222524 | 0.000000 | 2.519819  |
| N | 0.853145  | 0.000000 | 0.502283  |
| C | 0.939674  | 0.000000 | -0.879701 |
| N | -0.305895 | 0.000000 | -1.505094 |
| C | -1.501576 | 0.000000 | -0.822177 |
| C | -1.550835 | 0.000000 | 0.528894  |
| H | 1.739086  | 0.000000 | 0.998469  |
| O | 1.989534  | 0.000000 | -1.501242 |
| H | -0.278742 | 0.000000 | -2.516519 |
| H | -2.390694 | 0.000000 | -1.444014 |
| H | -2.488622 | 0.000000 | 1.068407  |

Anion

|   |           |           |           |
|---|-----------|-----------|-----------|
| C | 1.306648  | 0.341238  | 0.003711  |
| O | 2.297251  | 1.121228  | 0.038024  |
| N | -0.000413 | 0.978724  | -0.056867 |
| C | -1.226039 | 0.359937  | 0.004944  |
| N | -1.170240 | -1.007213 | 0.080465  |
| C | 0.027925  | -1.775770 | -0.106303 |
| C | 1.254016  | -1.059838 | -0.000207 |
| H | -0.001277 | 1.989300  | -0.027021 |
| O | -2.303930 | 0.986775  | -0.009037 |
| H | -2.065723 | -1.449088 | -0.071437 |
| H | -0.054774 | -2.797347 | 0.261666  |
| H | 2.194478  | -1.600861 | 0.026835  |

Compounds of table 2

1,4-ciclohexadiene

|   |           |           |           |
|---|-----------|-----------|-----------|
| C | -1.181390 | -0.026124 | -0.793065 |
| C | -1.325896 | 0.014781  | 0.707210  |
| C | 0.001132  | 0.039282  | 1.422594  |
| C | 1.181390  | 0.026124  | 0.793065  |
| C | 1.325896  | -0.014781 | -0.707210 |
| C | -0.001132 | -0.039282 | -1.422594 |
| H | -2.102280 | -0.045490 | -1.375120 |
| H | 1.918917  | 0.850074  | -1.049242 |
| H | 0.028010  | -0.069239 | -2.511379 |
| H | -1.918917 | -0.850074 | 1.049242  |
| H | -1.925154 | 0.892928  | 1.001118  |
| H | -0.028010 | 0.069239  | 2.511379  |
| H | 2.102280  | 0.045490  | 1.375120  |
| H | 1.925154  | -0.892928 | -1.001118 |

2-methyl-2-butene

|   |           |           |          |
|---|-----------|-----------|----------|
| C | -0.169586 | -0.008279 | 0.435233 |
|---|-----------|-----------|----------|

|   |           |           |           |
|---|-----------|-----------|-----------|
| C | -0.185112 | 0.027466  | 1.943809  |
| C | 0.971188  | 0.102758  | -0.265620 |
| C | -1.510857 | -0.176383 | -0.251646 |
| C | 1.065710  | 0.075957  | -1.772233 |
| H | 1.905463  | 0.221602  | 0.283221  |
| H | -2.328977 | -0.250496 | 0.473032  |
| H | -1.734230 | 0.669130  | -0.916930 |
| H | -1.537048 | -1.081985 | -0.873409 |
| H | -0.810257 | 0.853006  | 2.314252  |
| H | -0.613180 | -0.897175 | 2.357751  |
| H | 0.821198  | 0.151091  | 2.358661  |
| H | 2.102403  | 0.184372  | -2.107005 |
| H | 0.681909  | -0.865185 | -2.191645 |
| H | 0.484660  | 0.886523  | -2.235181 |

acetic acid

|   |           |           |           |
|---|-----------|-----------|-----------|
| C | 0.044500  | 0.000000  | -1.401337 |
| C | 0.113955  | 0.000000  | 0.102906  |
| O | 1.125595  | 0.000000  | 0.771863  |
| O | -1.125313 | 0.000000  | 0.662616  |
| H | -1.001447 | 0.000000  | 1.631179  |
| H | 1.053741  | 0.000000  | -1.814443 |
| H | -0.502642 | -0.882314 | -1.750988 |
| H | -0.502642 | 0.882314  | -1.750988 |

acetone

|   |           |           |           |
|---|-----------|-----------|-----------|
| C | -0.170344 | 0.023269  | -1.421520 |
| C | -0.154694 | -0.002642 | 0.097433  |
| C | 1.208896  | -0.005526 | 0.767161  |
| O | -1.185697 | -0.020255 | 0.746978  |
| H | -1.199599 | 0.022692  | -1.787125 |
| H | 0.351801  | 0.914507  | -1.793397 |
| H | 0.363564  | -0.847602 | -1.823656 |
| H | 1.094352  | -0.024844 | 1.853259  |
| H | 1.791689  | -0.877646 | 0.443225  |
| H | 1.780562  | 0.884465  | 0.473341  |

acetylene

|   |          |          |           |
|---|----------|----------|-----------|
| C | 0.000000 | 0.000000 | -0.603804 |
| C | 0.000000 | 0.000000 | 0.603804  |
| H | 0.000000 | 0.000000 | -1.671377 |
| H | 0.000000 | 0.000000 | 1.671377  |

allene

|   |           |           |           |
|---|-----------|-----------|-----------|
| C | 0.000005  | 0.000014  | -0.000001 |
| C | 0.047212  | 0.125088  | 1.302613  |
| C | -0.047203 | -0.125061 | -1.302615 |
| H | 0.872776  | 0.635896  | 1.794246  |
| H | -0.737323 | -0.277468 | 1.940295  |
| H | -0.528960 | 0.624185  | -1.927696 |
| H | 0.393427  | -0.982854 | -1.806819 |

butyrolactone

|   |           |           |           |
|---|-----------|-----------|-----------|
| C | -1.079298 | 0.191197  | -1.055936 |
| O | -1.079334 | -0.114796 | 0.357682  |
| C | 0.187124  | -0.071935 | 0.866048  |
| C | 1.170615  | 0.227758  | -0.261711 |
| C | 0.361334  | -0.059713 | -1.531862 |
| O | 0.418927  | -0.246407 | 2.035827  |
| H | -1.825708 | -0.451175 | -1.527728 |

|   |           |           |           |
|---|-----------|-----------|-----------|
| H | -1.380917 | 1.238808  | -1.176011 |
| H | 2.075601  | -0.372392 | -0.142721 |
| H | 1.460942  | 1.283950  | -0.184317 |
| H | 0.631856  | 0.572604  | -2.382447 |
| H | 0.482824  | -1.106016 | -1.834083 |

cis-1-bromo-1-propene

|    |           |           |           |
|----|-----------|-----------|-----------|
| C  | -1.097393 | 0.000730  | 0.166499  |
| C  | -1.071801 | 0.001240  | 1.499133  |
| C  | 0.122460  | 0.001046  | 2.403004  |
| Br | 0.430495  | -0.000728 | -0.969697 |
| H  | -2.051210 | 0.002298  | 1.980410  |
| H  | -2.017497 | 0.001200  | -0.405383 |
| H  | 0.117224  | 0.888107  | 3.050401  |
| H  | 0.106541  | -0.875499 | 3.064241  |
| H  | 1.058009  | -0.008730 | 1.837919  |

cis-1,2-difluorethylene

|   |           |           |           |
|---|-----------|-----------|-----------|
| C | -0.439969 | -0.654226 | 0.399787  |
| C | -0.423739 | 0.674039  | 0.385039  |
| F | 0.427775  | 1.377771  | -0.388707 |
| F | 0.392554  | -1.396541 | -0.356702 |
| H | -1.115961 | -1.237027 | 1.014041  |
| H | -1.084749 | 1.287076  | 0.985680  |

cis-2-butene

|   |           |           |           |
|---|-----------|-----------|-----------|
| C | -0.681637 | -0.000685 | -0.673410 |
| C | -0.685123 | -0.001891 | 0.667403  |
| C | 0.522218  | -0.000413 | 1.564096  |
| H | -1.650271 | -0.004168 | 1.175730  |
| H | -1.646209 | -0.002053 | -1.180525 |
| C | 0.542009  | 0.002421  | -1.562886 |
| H | 0.522537  | 0.879796  | 2.222307  |
| H | 0.525864  | -0.881789 | 2.220732  |
| H | 1.461072  | 0.001864  | 1.001264  |
| H | 0.256744  | 0.002828  | -2.619886 |
| H | 1.171063  | 0.886578  | -1.394631 |
| H | 1.174399  | -0.879652 | -1.396211 |

cyclobutene

|   |           |           |           |
|---|-----------|-----------|-----------|
| C | 0.000000  | 0.000000  | 0.000000  |
| C | 0.000000  | 0.000000  | 1.520221  |
| C | 1.339283  | 0.000000  | 1.622286  |
| C | 1.569652  | 0.000000  | 0.119621  |
| H | 2.062512  | 0.890677  | -0.290091 |
| H | 2.062512  | -0.890677 | -0.290091 |
| H | -0.807275 | 0.000000  | 2.249113  |
| H | -0.425082 | 0.890677  | -0.479667 |
| H | -0.425082 | -0.890676 | -0.479666 |
| H | 2.026781  | 0.000000  | 2.465092  |

cyclopentene

|   |           |           |           |
|---|-----------|-----------|-----------|
| C | -1.079217 | -0.136263 | -0.677058 |
| C | -0.966004 | 0.058556  | 0.820095  |
| C | 0.308557  | 0.084765  | 1.227505  |
| C | 1.276089  | -0.087008 | 0.075713  |
| C | 0.372481  | 0.109329  | -1.172575 |
| H | -1.832464 | 0.124844  | 1.473738  |
| H | 0.632337  | 0.176636  | 2.261489  |
| H | 1.727865  | -1.091270 | 0.099535  |



|   |           |           |           |
|---|-----------|-----------|-----------|
| H | 2.109718  | 0.626547  | 0.105809  |
| H | 0.652403  | -0.544129 | -2.005670 |
| H | 0.463539  | 1.143743  | -1.525176 |
| H | -1.422579 | -1.157233 | -0.907147 |
| H | -1.802261 | 0.544584  | -1.144654 |

di-tert-butyl peroxide

|   |           |           |           |
|---|-----------|-----------|-----------|
| C | 0.696976  | 1.207199  | 1.157559  |
| C | 0.628311  | 1.088267  | 2.686220  |
| C | 2.152249  | 1.187192  | 0.670646  |
| O | 0.005244  | 0.009083  | 0.737390  |
| C | -0.047986 | 2.457499  | 0.670646  |
| H | -0.035116 | 2.520914  | -0.420699 |
| H | -1.091809 | 2.433410  | 1.003623  |
| H | 0.424029  | 3.360845  | 1.075186  |
| H | 2.200734  | 1.230046  | -0.420699 |
| H | 2.698563  | 2.047642  | 1.075186  |
| H | 2.653300  | 0.271171  | 1.003623  |
| H | -0.411505 | 1.065516  | 3.029720  |
| H | 1.128516  | 0.176385  | 3.029720  |
| H | 1.125608  | 1.949610  | 3.146231  |
| O | -0.005244 | -0.009083 | -0.737390 |
| C | -0.696976 | -1.207199 | -1.157559 |
| C | -0.628311 | -1.088267 | -2.686220 |
| C | 0.047986  | -2.457499 | -0.670646 |
| C | -2.152249 | -1.187192 | -0.670646 |
| H | -1.125608 | -1.949610 | -3.146231 |
| H | -1.128516 | -0.176385 | -3.029720 |
| H | 0.411505  | -1.065516 | -3.029720 |
| H | -2.698563 | -2.047642 | -1.075186 |
| H | -2.200734 | -1.230046 | 0.420699  |
| H | -2.653300 | -0.271171 | -1.003623 |
| H | -0.424029 | -3.360845 | -1.075186 |
| H | 1.091809  | -2.433410 | -1.003623 |
| H | 0.035116  | -2.520914 | 0.420699  |

ethylene carbonate

|   |           |           |           |
|---|-----------|-----------|-----------|
| C | -1.252004 | -0.255571 | -0.809820 |
| C | -1.297375 | -0.287495 | 0.723052  |
| O | -0.019598 | 0.261334  | 1.089106  |
| C | 0.832665  | 0.177374  | 0.028340  |
| O | 0.159371  | -0.231559 | -1.084349 |
| O | 2.002160  | 0.426498  | 0.068144  |
| H | -1.368456 | -1.304155 | 1.124471  |
| H | -2.079932 | 0.337714  | 1.156303  |
| H | -1.704530 | 0.649551  | -1.229060 |
| H | -1.682267 | -1.139134 | -1.284350 |

fluorethylene

|   |           |          |           |
|---|-----------|----------|-----------|
| C | -0.402382 | 0.000000 | -1.131582 |
| C | -0.394094 | 0.000000 | 0.194241  |
| F | 0.763389  | 0.000000 | 0.904519  |
| H | 0.517132  | 0.000000 | -1.708013 |
| H | -1.350044 | 0.000000 | -1.658790 |
| H | -1.258737 | 0.000000 | 0.850176  |

formamide

|   |           |           |           |
|---|-----------|-----------|-----------|
| N | -0.233254 | 0.216948  | -1.050354 |
| C | -0.301475 | 0.012102  | 0.294207  |
| O | 0.644880  | -0.290701 | 1.000983  |

|   |           |          |           |
|---|-----------|----------|-----------|
| H | -1.323734 | 0.150038 | 0.695263  |
| H | 0.655605  | 0.117501 | -1.525216 |
| H | -1.049253 | 0.466953 | -1.590659 |

furan

|   |           |          |           |
|---|-----------|----------|-----------|
| C | -0.957505 | 0.000000 | -0.722894 |
| C | -0.957505 | 0.000000 | 0.639717  |
| O | 0.322651  | 0.000000 | 1.114832  |
| C | 1.151168  | 0.000000 | 0.029431  |
| C | 0.423402  | 0.000000 | -1.122552 |
| H | -1.734755 | 0.000000 | 1.388857  |
| H | 2.208387  | 0.000000 | 0.247645  |
| H | 0.814572  | 0.000000 | -2.130903 |
| H | -1.826767 | 0.000000 | -1.366455 |

guanine

|   |           |           |           |
|---|-----------|-----------|-----------|
| N | -2.284659 | -0.094091 | 0.442420  |
| C | -2.148604 | -0.100098 | 1.743856  |
| N | -0.823287 | -0.047655 | 2.143781  |
| C | -0.067319 | -0.007071 | 1.001549  |
| C | -0.992288 | -0.035538 | -0.044043 |
| C | -0.503785 | -0.014352 | -1.398221 |
| O | -1.092690 | -0.043551 | -2.467573 |
| N | 0.933566  | 0.042554  | -1.392476 |
| C | 1.743972  | 0.075982  | -0.286062 |
| N | 1.288376  | 0.061292  | 0.944589  |
| N | 3.104754  | 0.070183  | -0.507958 |
| H | -0.463611 | -0.042733 | 3.088950  |
| H | -2.957365 | -0.140126 | 2.461366  |
| H | 3.449989  | 0.546128  | -1.332479 |
| H | 3.646387  | 0.257921  | 0.327372  |
| H | 1.343012  | -0.012299 | -2.319592 |

imidazole

|   |           |           |          |
|---|-----------|-----------|----------|
| C | 0.636448  | -0.986072 | 0.000000 |
| N | -0.742328 | -0.986303 | 0.000000 |
| C | -1.092607 | 0.282767  | 0.000000 |
| N | 0.000000  | 1.106769  | 0.000000 |
| C | 1.121491  | 0.300558  | 0.000000 |
| H | 1.197904  | -1.910411 | 0.000000 |
| H | -2.106021 | 0.661442  | 0.000000 |
| H | -0.010579 | 2.117291  | 0.000000 |
| H | 2.123001  | 0.704891  | 0.000000 |

methyl vinyl ether

|   |           |           |           |
|---|-----------|-----------|-----------|
| C | 0.615248  | -0.107734 | 0.337804  |
| C | 0.931913  | -0.889613 | 1.373591  |
| H | 1.350525  | 0.524881  | -0.161869 |
| H | 1.950607  | -0.908025 | 1.743103  |
| H | 0.189881  | -1.514248 | 1.861489  |
| O | -0.647960 | -0.041857 | -0.171474 |
| C | -0.822251 | 0.838860  | -1.275946 |
| H | -1.874500 | 0.774741  | -1.558984 |
| H | -0.583913 | 1.874380  | -0.997498 |
| H | -0.198386 | 0.534044  | -2.127133 |

propene

|   |           |           |           |
|---|-----------|-----------|-----------|
| C | -0.433698 | 0.152445  | -0.116442 |
| C | -0.535642 | -0.163611 | 1.178525  |
| C | 0.812561  | 0.024417  | -0.946885 |

|   |           |           |           |
|---|-----------|-----------|-----------|
| H | -1.314843 | 0.536847  | -0.633645 |
| H | -1.469272 | -0.047112 | 1.723284  |
| H | 0.312462  | -0.550919 | 1.741422  |
| H | 0.650900  | -0.647861 | -1.800685 |
| H | 1.111346  | 0.996275  | -1.363161 |
| H | 1.650083  | -0.366737 | -0.358400 |

propiolactone

|   |           |           |           |
|---|-----------|-----------|-----------|
| C | -1.028717 | 0.000000  | -0.980662 |
| O | -0.955646 | 0.000000  | 0.490225  |
| C | 0.421121  | 0.000000  | 0.465684  |
| O | 1.171978  | 0.000000  | 1.396383  |
| C | 0.506667  | 0.000000  | -1.062208 |
| H | 0.974201  | 0.894354  | -1.482345 |
| H | 0.974200  | -0.894355 | -1.482345 |
| H | -1.536737 | -0.900082 | -1.332526 |
| H | -1.536737 | 0.900082  | -1.332526 |

propyne

|   |           |           |           |
|---|-----------|-----------|-----------|
| C | 0.581028  | -1.024334 | 0.398074  |
| H | 0.601441  | -1.065630 | 1.493733  |
| H | 1.617779  | -1.053364 | 0.041851  |
| H | 0.076927  | -1.929043 | 0.037554  |
| C | -0.101934 | 0.179707  | -0.069837 |
| C | -0.667418 | 1.176638  | -0.457262 |
| H | -1.166199 | 2.055974  | -0.798987 |

pyrrole

|   |           |          |           |
|---|-----------|----------|-----------|
| C | -0.919519 | 0.000000 | -0.730917 |
| N | -0.919520 | 0.000000 | 0.645603  |
| C | 0.375185  | 0.000000 | 1.113107  |
| C | 1.216332  | 0.000000 | 0.017814  |
| C | 0.396338  | 0.000000 | -1.150089 |
| H | -1.844689 | 0.000000 | -1.289787 |
| H | 0.586626  | 0.000000 | 2.173093  |
| H | 2.297892  | 0.000000 | 0.051331  |
| H | -1.745325 | 0.000000 | 1.225407  |
| H | 0.732120  | 0.000000 | -2.178752 |

tetramethylethylene

|   |           |           |           |
|---|-----------|-----------|-----------|
| C | 0.772046  | 1.337223  | 1.196141  |
| H | 0.782352  | 1.355074  | 2.290570  |
| H | 1.817149  | 1.387269  | 0.858014  |
| C | 0.061654  | 0.106787  | 0.663446  |
| H | 0.292835  | 2.267332  | 0.858014  |
| C | -0.061654 | -0.106787 | -0.663446 |
| C | -0.505599 | -0.875723 | 1.671064  |
| C | -0.772046 | -1.337223 | -1.196141 |
| C | 0.505599  | 0.875723  | -1.671064 |
| H | -0.318599 | -0.551830 | 2.699812  |
| H | -1.592552 | -0.998255 | 1.558845  |
| H | -0.068238 | -1.878318 | 1.558845  |
| H | 0.318599  | 0.551830  | -2.699812 |
| H | 0.068238  | 1.878318  | -1.558845 |
| H | 1.592552  | 0.998255  | -1.558845 |
| H | -0.782352 | -1.355074 | -2.290570 |
| H | -0.292835 | -2.267332 | -0.858014 |
| H | -1.817149 | -1.387269 | -0.858014 |

trans-1-bromo-1-propene

|    |           |           |           |
|----|-----------|-----------|-----------|
| C  | -0.296317 | -0.000928 | -0.687942 |
| Br | -0.295751 | -0.000341 | 1.212486  |
| C  | 0.804730  | 0.001052  | -1.435767 |
| C  | 0.758148  | 0.001052  | -2.938692 |
| H  | -1.301120 | -0.003093 | -1.096897 |
| H  | 1.784226  | 0.003034  | -0.960268 |
| H  | 1.264105  | 0.886795  | -3.345649 |
| H  | 1.275402  | -0.877933 | -3.345980 |
| H  | -0.270691 | -0.005393 | -3.313803 |

trans-1-chloro-1-propene

|    |           |           |           |
|----|-----------|-----------|-----------|
| C  | 0.321379  | 0.000000  | -0.319846 |
| C  | 0.303895  | 0.000000  | 1.012521  |
| C  | 1.548702  | 0.000000  | 1.855696  |
| H  | -0.653895 | 0.000000  | 1.531114  |
| Cl | -1.131147 | 0.000000  | -1.303722 |
| H  | 1.227768  | 0.000000  | -0.916700 |
| H  | 1.578121  | 0.882369  | 2.508554  |
| H  | 1.578121  | -0.882369 | 2.508554  |
| H  | 2.455532  | 0.000000  | 1.241529  |

trans-1,2-difluorethylene

|   |           |           |           |
|---|-----------|-----------|-----------|
| C | 0.007844  | -0.662614 | 0.000000  |
| C | -0.009677 | 0.664414  | -0.000115 |
| F | 1.157188  | 1.353516  | 0.013699  |
| H | 0.892433  | -1.288475 | 0.010565  |
| F | -1.155969 | -1.355180 | -0.013684 |
| H | -0.892403 | 1.292655  | -0.010564 |

trans-2-butene

|   |           |           |           |
|---|-----------|-----------|-----------|
| C | -0.016421 | -0.000473 | -0.668988 |
| C | 0.016421  | 0.000473  | 0.668988  |
| C | 1.263688  | -0.001040 | 1.508750  |
| H | -0.929898 | 0.002506  | 1.215528  |
| C | -1.263688 | 0.001040  | -1.508750 |
| H | 0.929898  | -0.002506 | -1.215528 |
| H | 1.304710  | 0.880663  | 2.163427  |
| H | 1.301684  | -0.881898 | 2.164746  |
| H | 2.166801  | -0.003056 | 0.887549  |
| H | -2.166801 | 0.003056  | -0.887549 |
| H | -1.301684 | 0.881898  | -2.164746 |
| H | -1.304710 | -0.880663 | -2.163427 |

trifluorethylene

|   |           |          |           |
|---|-----------|----------|-----------|
| C | 0.245657  | 0.000000 | -0.957578 |
| C | 0.224491  | 0.000000 | 0.369481  |
| F | 1.332061  | 0.000000 | 1.106993  |
| F | -0.867418 | 0.000000 | 1.118382  |
| F | -0.906183 | 0.000000 | -1.661575 |
| H | 1.152964  | 0.000000 | -1.545622 |

2-butyne

|   |           |           |           |
|---|-----------|-----------|-----------|
| C | 0.964269  | -1.711125 | 0.650664  |
| H | 0.990054  | -1.761576 | 1.746360  |
| H | 2.000807  | -1.744790 | 0.292591  |
| H | 0.458814  | -2.615189 | 0.288801  |
| C | 0.282341  | -0.501022 | 0.190516  |
| C | -0.282341 | 0.501022  | -0.190516 |
| C | -0.964269 | 1.711125  | -0.650664 |
| H | -0.990269 | 1.761455  | -1.746361 |

|   |           |          |           |
|---|-----------|----------|-----------|
| H | -2.000733 | 1.744910 | -0.292387 |
| H | -0.458673 | 2.615192 | -0.289004 |

acetonitrile

|   |           |           |           |
|---|-----------|-----------|-----------|
| C | 0.552985  | -0.968563 | 0.391022  |
| H | 0.560170  | -0.984538 | 1.485634  |
| H | 1.587411  | -0.984507 | 0.032983  |
| H | 0.042815  | -1.867476 | 0.030236  |
| C | -0.131208 | 0.229813  | -0.092778 |
| N | -0.674437 | 1.181289  | -0.476902 |

dimethyl formamide

|   |           |           |           |
|---|-----------|-----------|-----------|
| C | -0.135078 | -0.546385 | -0.922402 |
| N | 0.237889  | 0.048495  | 0.246683  |
| C | 1.540863  | -0.186605 | 0.842047  |
| C | -0.669724 | 0.948260  | 0.941621  |
| H | -0.889797 | 0.569277  | 1.948349  |
| H | -1.595789 | 1.015533  | 0.368524  |
| H | -0.223806 | 1.947341  | 1.033972  |
| H | 2.112752  | -0.878372 | 0.216543  |
| H | 1.439868  | -0.625272 | 1.843895  |
| H | 2.105691  | 0.751195  | 0.930397  |
| H | 0.657557  | -1.200865 | -1.331339 |
| O | -1.211007 | -0.401240 | -1.488090 |

ethyl isocyanate

|   |           |           |           |
|---|-----------|-----------|-----------|
| C | -0.620570 | 0.000000  | -1.222051 |
| N | -0.252678 | 0.000000  | -0.075272 |
| C | 0.961163  | 0.000000  | 0.720090  |
| C | 0.633216  | 0.000000  | 2.210876  |
| H | 1.555754  | -0.885626 | 0.462625  |
| H | 1.555754  | 0.885626  | 0.462625  |
| H | 1.560274  | 0.000000  | 2.795372  |
| H | 0.051826  | 0.887528  | 2.481684  |
| H | 0.051826  | -0.887528 | 2.481684  |
| O | -1.106192 | 0.000000  | -2.301322 |

tetrafluoroethylene

|   |           |          |           |
|---|-----------|----------|-----------|
| C | -0.020970 | 0.000000 | -0.662733 |
| C | 0.020970  | 0.000000 | 0.662733  |
| F | 1.151608  | 0.000000 | 1.356718  |
| F | 1.063534  | 0.000000 | -1.426808 |
| F | -1.151608 | 0.000000 | -1.356718 |
| F | -1.063534 | 0.000000 | 1.426808  |

Compounds of Table 3

List of the XYZ coordinates for the optimized structures  
at the B3LYP/Aug-CC-pVDZ level

Acetone

|   |           |           |           |
|---|-----------|-----------|-----------|
| C | -0.000535 | -0.014180 | 0.001383  |
| C | -0.001595 | 0.000031  | 1.518181  |
| O | 1.034919  | -0.000197 | 2.156582  |
| C | -1.355687 | 0.014543  | 2.201632  |
| H | -1.230764 | -0.076788 | 3.285416  |
| H | -1.876903 | 0.956351  | 1.969857  |
| H | -1.989631 | -0.801326 | 1.823544  |
| H | 1.023579  | 0.076869  | -0.374698 |
| H | -0.442380 | -0.955759 | -0.359988 |

H -0.623149 0.801989 -0.394470

#### Adenine

N -1.008017 0.006260 -1.639703  
C -1.008848 -0.001374 -0.299738  
C 0.113109 -0.016614 0.538437  
C 1.368379 -0.024619 -0.108840  
N 1.401715 -0.017284 -1.453969  
C 0.237331 -0.002588 -2.126705  
N -0.257668 -0.020810 1.874991  
C -1.570107 -0.008407 1.844314  
N -2.085208 0.003726 0.562370  
N 2.538421 -0.039300 0.575667  
H 0.326101 0.002769 -3.214133  
H -3.059393 0.014332 0.294708  
H -2.216071 -0.007380 2.716318  
H 3.407085 -0.044954 0.064356  
H 2.539462 -0.045559 1.583315

#### Cyclobutene

C -0.733443 -0.000804 -0.758021  
C -0.662105 -0.144604 0.808234  
C 0.840574 0.022954 0.639964  
C 0.779622 0.145818 -0.698264  
H -0.995084 -1.117698 1.197560  
H -1.173308 0.651967 1.368152  
H 1.533672 0.296389 -1.472435  
H -1.108205 -0.889673 -1.286061  
H -1.286429 0.879992 -1.115467  
H 1.662564 0.036576 1.357426

#### Cyclopentadiene

C -0.040342 -0.755070 -0.978447  
C -0.043610 0.596253 -1.057711  
C 0.013734 1.172441 0.333109  
C 0.050005 -0.050048 1.212822  
C 0.017938 -1.157482 0.435070  
H -0.081036 1.195232 -1.965453  
H 0.094816 -0.018772 2.299651  
H 0.032370 -2.188981 0.785101  
H -0.074977 -1.447772 -1.818500  
H 0.901506 1.811864 0.478775  
H -0.859033 1.811864 0.551363

#### Cyclopropne

C -0.475269 0.668144 -0.038584  
C -0.527447 -0.627863 0.036961  
C 0.866212 -0.034792 0.001389  
H 1.466950 -0.005513 0.918860  
H 1.465611 -0.112284 -0.914150  
H -1.111618 -1.538989 0.090468  
H -0.984309 1.623179 -0.093840

#### Cytosine

C 0.001282 -0.019234 0.001145  
C 0.002245 -0.031340 1.442718  
N 1.099194 -0.019936 2.181530  
C 2.333686 0.004903 1.584681  
N 2.348159 0.017120 0.159175  
C 1.223660 0.005433 -0.598188

|   |           |           |           |
|---|-----------|-----------|-----------|
| N | -1.185726 | -0.056002 | 2.105192  |
| O | 3.405699  | 0.017167  | 2.173598  |
| H | 3.267899  | 0.035429  | -0.262180 |
| H | 1.355136  | 0.016639  | -1.679467 |
| H | -0.916144 | -0.029067 | -0.581305 |
| H | -2.067103 | -0.066031 | 1.619523  |
| H | -1.171599 | -0.064256 | 3.114251  |

#### Ethylene

|   |           |          |           |
|---|-----------|----------|-----------|
| C | 0.000000  | 0.000000 | -0.667627 |
| C | 0.000000  | 0.000000 | 0.667627  |
| H | 0.928688  | 0.000000 | -1.240795 |
| H | -0.928688 | 0.000000 | -1.240795 |
| H | -0.928688 | 0.000000 | 1.240795  |
| H | 0.928688  | 0.000000 | 1.240795  |

#### Fluorethylene

|   |           |           |           |
|---|-----------|-----------|-----------|
| C | 0.176987  | -1.131977 | 0.359088  |
| C | 0.173284  | 0.194754  | 0.351575  |
| F | -0.338420 | 0.906022  | -0.686619 |
| H | -0.230410 | -1.711791 | -0.467479 |
| H | 0.598913  | -1.654272 | 1.215132  |
| H | 0.558984  | 0.847815  | 1.134121  |

#### Formamide

|   |           |           |           |
|---|-----------|-----------|-----------|
| N | -0.231614 | 0.216834  | -1.051449 |
| C | -0.300736 | 0.012094  | 0.293365  |
| O | 0.645427  | -0.290392 | 0.998126  |
| H | -1.327427 | 0.150875  | 0.694780  |
| H | 0.656671  | 0.117158  | -1.524301 |
| H | -1.049560 | 0.466240  | -1.586302 |

#### Furan

|   |           |          |           |
|---|-----------|----------|-----------|
| C | -0.000439 | 0.000000 | 0.000155  |
| C | 0.000215  | 0.000000 | 1.364288  |
| O | 1.280824  | 0.000000 | 1.840027  |
| C | 2.109407  | 0.000000 | 0.753896  |
| C | 1.381323  | 0.000000 | -0.399723 |
| H | -0.784147 | 0.000000 | 2.111639  |
| H | 3.171695  | 0.000000 | 0.966765  |
| H | 1.776817  | 0.000000 | -1.410272 |
| H | -0.874479 | 0.000000 | -0.643024 |

#### Propene

|   |           |           |           |
|---|-----------|-----------|-----------|
| C | 0.238586  | 1.217833  | 0.406121  |
| C | 0.231173  | -0.119153 | 0.393506  |
| C | -0.393192 | -0.976451 | -0.669296 |
| H | 0.715425  | -0.653620 | 1.217808  |
| H | 0.712527  | 1.777714  | 1.212871  |
| H | -0.229506 | 1.800481  | -0.390672 |
| H | 0.357018  | -1.634192 | -1.135810 |
| H | -1.165929 | -1.634190 | -0.241124 |
| H | -0.856332 | -0.367668 | -1.457660 |

#### Thiophene

|   |           |          |           |
|---|-----------|----------|-----------|
| C | -0.000758 | 0.000000 | -0.000242 |
| C | -0.000758 | 0.000000 | 1.430761  |
| C | 1.264026  | 0.000000 | 1.960992  |
| S | 2.478052  | 0.000000 | 0.715260  |
| C | 1.264027  | 0.000000 | -0.530473 |

|   |           |          |           |
|---|-----------|----------|-----------|
| H | 1.560254  | 0.000000 | 3.006121  |
| H | 1.560256  | 0.000000 | -1.575602 |
| H | -0.903639 | 0.000000 | -0.608955 |
| H | -0.903640 | 0.000000 | 2.039472  |

Thymine

|   |           |           |           |
|---|-----------|-----------|-----------|
| C | -0.936094 | 0.034551  | -0.839041 |
| C | -0.926492 | -0.106389 | 0.622567  |
| N | 0.352299  | -0.099542 | 1.209104  |
| C | 1.577627  | 0.022666  | 0.575859  |
| N | 1.461890  | 0.150126  | -0.801015 |
| C | 0.255120  | 0.155122  | -1.472914 |
| O | -1.921965 | -0.223739 | 1.323753  |
| O | 2.650427  | 0.019722  | 1.157728  |
| C | -2.262332 | 0.036652  | -1.542507 |
| H | 0.384723  | -0.195584 | 2.218418  |
| H | 2.335741  | 0.241883  | -1.300180 |
| H | 0.329589  | 0.263435  | -2.554069 |
| H | -2.896896 | 0.855805  | -1.176427 |
| H | -2.132474 | 0.148058  | -2.626347 |
| H | -2.809714 | -0.895803 | -1.346032 |

trans-1-bromo-1-propene

|    |           |           |           |
|----|-----------|-----------|-----------|
| C  | -0.307291 | -0.001571 | -0.689223 |
| Br | -0.271935 | -0.000683 | 1.222692  |
| C  | 0.791746  | 0.001908  | -1.442175 |
| C  | 0.762670  | 0.001240  | -2.944810 |
| H  | -1.323507 | -0.005228 | -1.081027 |
| H  | 1.772208  | 0.005468  | -0.959642 |
| H  | 1.278624  | 0.887905  | -3.344175 |
| H  | 1.285448  | -0.881712 | -3.343514 |
| H  | -0.265231 | -0.002855 | -3.330639 |

trans-1-chloro-1-propene

|    |           |           |           |
|----|-----------|-----------|-----------|
| C  | 0.324191  | 0.000000  | -0.319733 |
| C  | 0.306903  | 0.000000  | 1.012552  |
| C  | 1.549088  | 0.000000  | 1.856668  |
| H  | -0.655777 | 0.000000  | 1.529515  |
| Cl | -1.135812 | 0.000000  | -1.300106 |
| H  | 1.229736  | 0.000000  | -0.925380 |
| H  | 1.575822  | 0.884556  | 2.511437  |
| H  | 1.575822  | -0.884556 | 2.511437  |
| H  | 2.458507  | 0.000000  | 1.241305  |

Uracil

|   |           |          |           |
|---|-----------|----------|-----------|
| C | -0.310928 | 0.000000 | 1.300091  |
| O | -0.220357 | 0.000000 | 2.518091  |
| N | 0.854269  | 0.000000 | 0.502593  |
| C | 0.939362  | 0.000000 | -0.878657 |
| N | -0.305138 | 0.000000 | -1.505260 |
| C | -1.500323 | 0.000000 | -0.822899 |
| C | -1.550142 | 0.000000 | 0.529036  |
| H | 1.739561  | 0.000000 | 0.998128  |
| O | 1.988416  | 0.000000 | -1.499865 |
| H | -0.277278 | 0.000000 | -2.515646 |
| H | -2.394428 | 0.000000 | -1.444321 |
| H | -2.492368 | 0.000000 | 1.068273  |

1-4,cyclohexadiene

|   |           |           |           |
|---|-----------|-----------|-----------|
| C | -1.180941 | -0.026085 | -0.791698 |
|---|-----------|-----------|-----------|



|   |           |           |           |
|---|-----------|-----------|-----------|
| C | -1.326033 | 0.014783  | 0.707283  |
| C | 0.000246  | 0.039247  | 1.421460  |
| C | 1.180941  | 0.026085  | 0.791698  |
| C | 1.326033  | -0.014783 | -0.707283 |
| C | -0.000246 | -0.039247 | -1.421460 |
| H | -2.103044 | -0.045577 | -1.378172 |
| H | 1.921055  | 0.851315  | -1.050420 |
| H | 0.025900  | -0.069311 | -2.513713 |
| H | -1.921055 | -0.851315 | 1.050420  |
| H | -1.927301 | 0.894217  | 1.002225  |
| H | -0.025900 | 0.069311  | 2.513713  |
| H | 2.103044  | 0.045577  | 1.378172  |
| H | 1.927301  | -0.894217 | -1.002225 |

#### Imidazole

|   |           |          |           |
|---|-----------|----------|-----------|
| C | -0.970655 | 0.000000 | -0.661342 |
| N | -1.005445 | 0.000000 | 0.717466  |
| C | 0.255162  | 0.000000 | 1.101416  |
| N | 1.105599  | 0.000000 | 0.029820  |
| C | 0.329731  | 0.000000 | -1.112368 |
| H | -1.881055 | 0.000000 | -1.251853 |
| H | 0.609156  | 0.000000 | 2.126830  |
| H | 2.114461  | 0.000000 | 0.066509  |
| H | 0.761157  | 0.000000 | -2.106159 |

#### Propiolactone

|   |           |           |           |
|---|-----------|-----------|-----------|
| C | -1.030049 | 0.000000  | -0.982338 |
| O | -0.954984 | 0.000000  | 0.491835  |
| C | 0.424800  | 0.000000  | 0.465373  |
| O | 1.172846  | 0.000000  | 1.395625  |
| C | 0.505879  | 0.000000  | -1.061701 |
| H | 0.974636  | 0.897423  | -1.480169 |
| H | 0.974636  | -0.897423 | -1.480169 |
| H | -1.538710 | -0.903712 | -1.334388 |
| H | -1.538709 | 0.903712  | -1.334388 |

#### trans-2-butene

|   |           |           |           |
|---|-----------|-----------|-----------|
| C | 0.000989  | 0.000000  | 0.001706  |
| C | -0.000227 | 0.000000  | 1.503983  |
| C | 1.091745  | 0.000000  | 2.277757  |
| C | 1.090529  | 0.000000  | 3.780034  |
| H | -0.984286 | 0.000000  | 1.987012  |
| H | 2.075804  | 0.000000  | 1.794728  |
| H | -0.522623 | -0.883390 | -0.397103 |
| H | -0.522623 | 0.883390  | -0.397103 |
| H | 1.024504  | 0.000000  | -0.397707 |
| H | 0.067014  | 0.000000  | 4.179447  |
| H | 1.614141  | -0.883390 | 4.178843  |
| H | 1.614141  | 0.883390  | 4.178843  |

#### Compounds of Table S5

List of the XYZ coordinates for the optimized structures  
at the B1B95/6-31+G\* level

#### 1,4-ciclohexadiene

|   |           |           |           |
|---|-----------|-----------|-----------|
| C | -1.175539 | -0.025925 | -0.786620 |
| C | -1.320508 | 0.014721  | 0.704335  |
| C | -0.000965 | 0.039041  | 1.414146  |
| C | 1.175539  | 0.025925  | 0.786620  |
| C | 1.320508  | -0.014721 | -0.704335 |

|   |           |           |           |
|---|-----------|-----------|-----------|
| C | 0.000965  | -0.039041 | -1.414146 |
| H | -2.093813 | -0.045320 | -1.370063 |
| H | 1.912182  | 0.848457  | -1.045600 |
| H | 0.027498  | -0.068969 | -2.501533 |
| H | -1.912182 | -0.848457 | 1.045600  |
| H | -1.918407 | 0.891161  | 0.997569  |
| H | -0.027498 | 0.068969  | 2.501533  |
| H | 2.093813  | 0.045320  | 1.370063  |
| H | 1.918407  | -0.891161 | -0.997569 |

2-methyl-2-butene

|   |           |           |           |
|---|-----------|-----------|-----------|
| C | 0.154546  | 0.000000  | -1.939098 |
| C | 0.158956  | 0.000000  | -0.439057 |
| C | 1.506588  | 0.000000  | 0.235794  |
| C | -0.973798 | 0.000000  | 0.276075  |
| C | -1.024202 | 0.000000  | 1.776251  |
| H | -1.923742 | 0.000000  | -0.255899 |
| H | 2.323021  | 0.000000  | -0.491586 |
| H | 1.635386  | 0.879691  | 0.878300  |
| H | 1.635386  | -0.879691 | 0.878300  |
| H | 0.678348  | 0.879346  | -2.335194 |
| H | 0.678348  | -0.879346 | -2.335194 |
| H | -0.861875 | 0.000000  | -2.342299 |
| H | -2.052823 | 0.000000  | 2.144124  |
| H | -0.522297 | -0.879551 | 2.199827  |
| H | -0.522297 | 0.879551  | 2.199827  |

Acetone

|   |           |           |           |
|---|-----------|-----------|-----------|
| C | 0.153477  | -0.018713 | -1.415145 |
| C | 0.154567  | -0.000036 | 0.095200  |
| O | 1.188660  | -0.000275 | 0.732109  |
| C | -1.194727 | 0.018954  | 0.773827  |
| H | -1.075034 | -0.098252 | 1.851114  |
| H | -1.697939 | 0.970739  | 0.568493  |
| H | -1.841193 | -0.772811 | 0.381151  |
| H | 1.169443  | 0.098230  | -1.792967 |
| H | -0.256642 | -0.970286 | -1.772342 |
| H | -0.487820 | 0.773351  | -1.815617 |

cis-2-butene

|   |           |           |           |
|---|-----------|-----------|-----------|
| C | -0.972251 | 0.191892  | -1.343384 |
| C | -0.930467 | -0.036767 | 0.134694  |
| C | 0.148527  | -0.139912 | 0.918529  |
| C | 1.586872  | -0.053010 | 0.515568  |
| H | -1.904430 | -0.127936 | 0.614661  |
| H | -0.023082 | -0.307656 | 1.981399  |
| H | -1.495588 | -0.628182 | -1.849344 |
| H | -1.525696 | 1.108557  | -1.579662 |
| H | 0.020552  | 0.278495  | -1.789597 |
| H | 2.091320  | 0.762711  | 1.047102  |
| H | 2.120710  | -0.974154 | 0.778079  |
| H | 1.720130  | 0.114949  | -0.555076 |

Fluorethylene

|   |           |           |           |
|---|-----------|-----------|-----------|
| C | 0.176876  | -1.127507 | 0.358864  |
| C | 0.172187  | 0.194811  | 0.349350  |
| F | -0.335202 | 0.900506  | -0.680089 |
| H | -0.228807 | -1.703907 | -0.464225 |
| H | 0.595893  | -1.651001 | 1.209004  |
| H | 0.555349  | 0.846534  | 1.126745  |

Formamide

|   |           |           |           |
|---|-----------|-----------|-----------|
| N | -0.232764 | 0.216073  | -1.045358 |
| C | -0.300125 | 0.012074  | 0.292739  |
| O | 0.642933  | -0.289621 | 0.996431  |
| H | -1.320901 | 0.149822  | 0.693279  |
| H | 0.653829  | 0.116851  | -1.518934 |
| H | -1.046298 | 0.465337  | -1.584722 |

Furan

|   |           |          |           |
|---|-----------|----------|-----------|
| C | -0.952691 | 0.000000 | -0.720619 |
| C | -0.949573 | 0.000000 | 0.637478  |
| O | 0.320915  | 0.000000 | 1.108496  |
| C | 1.143089  | 0.000000 | 0.031615  |
| C | 0.420547  | 0.000000 | -1.118069 |
| H | -1.726353 | 0.000000 | 1.385535  |
| H | 2.199299  | 0.000000 | 0.249289  |
| H | 0.813984  | 0.000000 | -2.124078 |
| H | -1.822482 | 0.000000 | -1.361147 |

Imidazole

|   |           |          |           |
|---|-----------|----------|-----------|
| C | -0.964166 | 0.000000 | -0.656860 |
| N | -1.001680 | 0.000000 | 0.712689  |
| C | 0.253016  | 0.000000 | 1.092578  |
| N | 1.100279  | 0.000000 | 0.028538  |
| C | 0.329209  | 0.000000 | -1.107254 |
| H | -1.871892 | 0.000000 | -1.242826 |
| H | 0.605502  | 0.000000 | 2.114239  |
| H | 2.107868  | 0.000000 | 0.065559  |
| H | 0.759976  | 0.000000 | -2.096344 |

Propene

|   |           |           |           |
|---|-----------|-----------|-----------|
| C | 0.237382  | 1.211479  | 0.404072  |
| C | 0.231664  | -0.121275 | 0.394343  |
| C | -0.391002 | -0.972347 | -0.665567 |
| H | 0.713551  | -0.653493 | 1.214619  |
| H | 0.707746  | 1.773992  | 1.204731  |
| H | -0.229574 | 1.788704  | -0.390787 |
| H | 0.353908  | -1.626239 | -1.133799 |
| H | -1.162658 | -1.626237 | -0.242862 |
| H | -0.851239 | -0.363870 | -1.448990 |

trans-2-butene

|   |           |           |           |
|---|-----------|-----------|-----------|
| C | -0.543290 | 0.000000  | -1.881118 |
| C | -0.544816 | 0.000000  | -0.385343 |
| C | 0.544816  | 0.000000  | 0.385343  |
| C | 0.543290  | 0.000000  | 1.881118  |
| H | -1.524058 | 0.000000  | 0.096299  |
| H | 1.524058  | 0.000000  | -0.096299 |
| H | -1.062978 | -0.879542 | -2.279341 |
| H | -1.062978 | 0.879542  | -2.279341 |
| H | 0.475354  | 0.000000  | -2.279651 |
| H | -0.475354 | 0.000000  | 2.279651  |
| H | 1.062978  | -0.879542 | 2.279341  |
| H | 1.062978  | 0.879542  | 2.279341  |

Cyclopropene

|   |           |           |           |
|---|-----------|-----------|-----------|
| C | -0.386012 | 0.682384  | -0.025249 |
| C | -0.452724 | -0.669195 | 0.024810  |
| C | 0.877834  | -0.019689 | 0.000019  |

|   |           |           |           |
|---|-----------|-----------|-----------|
| H | 1.279624  | 0.108386  | 1.019001  |
| H | 1.271268  | -0.189959 | -1.015613 |
| H | -1.452438 | -1.088041 | 0.043248  |
| H | -1.333041 | 1.208614  | -0.044114 |

Acetylene

|   |          |          |           |
|---|----------|----------|-----------|
| C | 0.000000 | 0.000000 | -0.602954 |
| C | 0.000000 | 0.000000 | 0.602954  |
| H | 0.000000 | 0.000000 | -1.670096 |
| H | 0.000000 | 0.000000 | 1.670096  |

List of the XYZ coordinates for the optimized structures  
at the B3PW91/6-31+G\* level

1,4-ciclohexadiene

|   |           |           |           |
|---|-----------|-----------|-----------|
| C | -1.178701 | -0.026010 | -0.789285 |
| C | -1.322784 | 0.014747  | 0.705550  |
| C | -0.000511 | 0.039156  | 1.418256  |
| C | 1.178701  | 0.026010  | 0.789285  |
| C | 1.322784  | -0.014747 | -0.705550 |
| C | 0.000511  | -0.039156 | -1.418256 |
| H | -2.098992 | -0.045409 | -1.372629 |
| H | 1.915883  | 0.849812  | -1.047615 |
| H | 0.028250  | -0.069124 | -2.507262 |
| H | -1.915883 | -0.849812 | 1.047615  |
| H | -1.922119 | 0.892599  | 0.999507  |
| H | -0.028250 | 0.069124  | 2.507262  |
| H | 2.098992  | 0.045409  | 1.372629  |
| H | 1.922119  | -0.892599 | -0.999507 |

2-methyl-2-butene

|   |           |           |           |
|---|-----------|-----------|-----------|
| C | 0.166446  | 0.000000  | -1.940426 |
| C | 0.166308  | 0.000000  | -0.436449 |
| C | 1.517458  | 0.000000  | 0.240144  |
| C | -0.973697 | 0.000000  | 0.272775  |
| C | -1.049937 | 0.000000  | 1.775487  |
| H | -1.919510 | 0.000000  | -0.269854 |
| H | 2.334737  | 0.000000  | -0.489034 |
| H | 1.648045  | 0.881213  | 0.882817  |
| H | 1.648045  | -0.881213 | 0.882817  |
| H | 0.692292  | 0.880756  | -2.336074 |
| H | 0.692292  | -0.880756 | -2.336074 |
| H | -0.849944 | 0.000000  | -2.348607 |
| H | -2.088160 | 0.000000  | 2.121920  |
| H | -0.558632 | -0.881372 | 2.211453  |
| H | -0.558632 | 0.881372  | 2.211453  |

Acetone

|   |           |           |           |
|---|-----------|-----------|-----------|
| C | 0.153869  | -0.019137 | -1.418426 |
| C | 0.155287  | -0.000036 | 0.095643  |
| O | 1.191195  | -0.000276 | 0.733671  |
| C | -1.197480 | 0.019379  | 0.775654  |
| H | -1.078670 | -0.100441 | 1.854636  |
| H | -1.700313 | 0.974038  | 0.572471  |
| H | -1.846838 | -0.771620 | 0.380895  |
| H | 1.170952  | 0.100420  | -1.797798 |
| H | -0.254159 | -0.973585 | -1.776253 |
| H | -0.490590 | 0.772161  | -1.820543 |

cis-2-butene

|   |           |           |           |
|---|-----------|-----------|-----------|
| C | -0.976197 | 0.191596  | -1.346938 |
| C | -0.931943 | -0.037667 | 0.134284  |
| C | 0.149392  | -0.140188 | 0.919778  |
| C | 1.591461  | -0.051785 | 0.518213  |
| H | -1.907177 | -0.129939 | 0.615428  |
| H | -0.022871 | -0.308571 | 1.984231  |
| H | -1.500916 | -0.630175 | -1.853033 |
| H | -1.531711 | 1.109493  | -1.582829 |
| H | 0.017400  | 0.278916  | -1.795741 |
| H | 2.095203  | 0.765750  | 1.051729  |
| H | 2.126793  | -0.974016 | 0.782138  |
| H | 1.727001  | 0.116809  | -0.553943 |

Fluorethylene

|   |           |           |           |
|---|-----------|-----------|-----------|
| C | 0.177106  | -1.130236 | 0.359330  |
| C | 0.172416  | 0.194785  | 0.349814  |
| F | -0.335716 | 0.903216  | -0.681132 |
| H | -0.228764 | -1.708921 | -0.464137 |
| H | 0.596816  | -1.654340 | 1.210877  |
| H | 0.556256  | 0.847020  | 1.128586  |

Formamide

|   |           |           |           |
|---|-----------|-----------|-----------|
| N | -0.233057 | 0.216498  | -1.047614 |
| C | -0.300546 | 0.012090  | 0.293157  |
| O | 0.643936  | -0.290201 | 0.998776  |
| H | -1.323185 | 0.150193  | 0.693788  |
| H | 0.654438  | 0.117287  | -1.522361 |
| H | -1.048071 | 0.466104  | -1.587278 |

Furan

|   |           |          |           |
|---|-----------|----------|-----------|
| C | -0.954977 | 0.000000 | -0.722459 |
| C | -0.952441 | 0.000000 | 0.638956  |
| O | 0.321687  | 0.000000 | 1.111556  |
| C | 1.146440  | 0.000000 | 0.031490  |
| C | 0.421557  | 0.000000 | -1.120855 |
| H | -1.730071 | 0.000000 | 1.388249  |
| H | 2.204054  | 0.000000 | 0.249666  |
| H | 0.814699  | 0.000000 | -2.128672 |
| H | -1.825654 | 0.000000 | -1.364477 |

Imidazole

|   |           |          |           |
|---|-----------|----------|-----------|
| C | -0.966888 | 0.000000 | -0.658913 |
| N | -1.003791 | 0.000000 | 0.714499  |
| C | 0.253979  | 0.000000 | 1.095637  |
| N | 1.102885  | 0.000000 | 0.028649  |
| C | 0.330009  | 0.000000 | -1.110147 |
| H | -1.876165 | 0.000000 | -1.245220 |
| H | 0.606298  | 0.000000 | 2.118893  |
| H | 2.111732  | 0.000000 | 0.065272  |
| H | 0.761883  | 0.000000 | -2.100448 |

Propene

|   |           |           |           |
|---|-----------|-----------|-----------|
| C | 0.238166  | 1.214618  | 0.405407  |
| C | 0.231605  | -0.120893 | 0.394242  |
| C | -0.391813 | -0.975023 | -0.666948 |
| H | 0.714213  | -0.654101 | 1.215744  |
| H | 0.709812  | 1.776122  | 1.208248  |
| H | -0.228608 | 1.795312  | -0.389144 |
| H | 0.354790  | -1.630589 | -1.135010 |

|   |           |           |           |
|---|-----------|-----------|-----------|
| H | -1.164146 | -1.630587 | -0.242681 |
| H | -0.853811 | -0.368365 | -1.453368 |

trans-2-butene

|   |           |           |           |
|---|-----------|-----------|-----------|
| C | -0.544323 | 0.000000  | -1.885765 |
| C | -0.545553 | 0.000000  | -0.386741 |
| C | 0.545553  | 0.000000  | 0.386741  |
| C | 0.544323  | 0.000000  | 1.885765  |
| H | -1.527014 | 0.000000  | 0.094057  |
| H | 1.527014  | 0.000000  | -0.094057 |
| H | -1.065564 | -0.880994 | -2.284379 |
| H | -1.065564 | 0.880994  | -2.284379 |
| H | 0.475269  | 0.000000  | -2.286985 |
| H | -0.475269 | 0.000000  | 2.286985  |
| H | 1.065564  | -0.880994 | 2.284379  |
| H | 1.065564  | 0.880994  | 2.284379  |

Cyclopropene

|   |           |           |           |
|---|-----------|-----------|-----------|
| C | -0.594612 | 0.557310  | -0.076684 |
| C | -0.554622 | -0.765878 | 0.032379  |
| C | 0.770832  | 0.023791  | -0.000478 |
| H | 1.374731  | 0.130176  | 0.911115  |
| H | 1.401336  | -0.095626 | -0.893150 |
| H | -1.487128 | -1.321167 | 0.056125  |
| H | -1.106026 | 1.503894  | -0.027204 |

Acetylene

|   |          |          |           |
|---|----------|----------|-----------|
| C | 0.000000 | 0.000000 | -0.603791 |
| C | 0.000000 | 0.000000 | 0.603791  |
| H | 0.000000 | 0.000000 | -1.672016 |
| H | 0.000000 | 0.000000 | 1.672016  |

List of the XYZ coordinates for the optimized structures at the B3LYP/6-31+G\* level of the compounds in Table 4.

$\alpha$ -L-Alanine

|   |           |           |           |
|---|-----------|-----------|-----------|
| N | -1.644188 | -0.874528 | -0.379473 |
| C | -0.220510 | -0.761888 | -0.172262 |
| C | 0.294826  | 0.673484  | -0.225690 |
| C | 0.246510  | -1.383725 | 1.143983  |
| O | 1.650106  | 0.784943  | -0.241401 |
| O | -0.354531 | 1.722720  | -0.273999 |
| H | -1.922964 | -0.379941 | -1.204466 |
| H | -2.153587 | -0.518578 | 0.405663  |
| H | 0.286623  | -1.308439 | -1.026308 |
| H | 1.357098  | -1.289924 | 1.214585  |
| H | -0.032495 | -2.464175 | 1.174945  |
| H | -0.216311 | -0.868801 | 2.019295  |
| H | 1.901395  | 1.723015  | -0.280378 |

Ascorbic Acid

|   |           |           |           |
|---|-----------|-----------|-----------|
| C | -0.112667 | 0.412530  | -0.922113 |
| C | -0.091280 | 0.342349  | 0.580105  |
| O | 1.308983  | 0.306966  | 0.914050  |
| C | 2.076983  | 0.300368  | -0.249860 |
| C | 1.149680  | 0.373362  | -1.387609 |
| O | 3.279413  | 0.252140  | -0.220268 |
| C | -0.761964 | -0.881833 | 1.243248  |
| C | -2.154348 | -1.189613 | 0.699441  |
| O | -2.931276 | -0.009969 | 0.424273  |

|   |           |           |           |
|---|-----------|-----------|-----------|
| O | 1.624616  | 0.428342  | -2.656496 |
| O | -1.229648 | 0.549721  | -1.668578 |
| O | -0.898562 | -0.648782 | 2.644222  |
| H | -0.515406 | 1.250373  | 1.027889  |
| H | -2.078499 | -1.709246 | -0.258627 |
| H | -0.017063 | -0.486093 | 3.020355  |
| H | -2.680154 | -1.838758 | 1.408248  |
| H | -0.120750 | -1.757016 | 1.061669  |
| H | 0.876387  | 0.504978  | -3.272203 |
| H | -2.018264 | 0.575756  | -1.079953 |
| H | -3.130635 | 0.445732  | 1.258455  |

$\beta$ -Alanine

|   |           |           |           |
|---|-----------|-----------|-----------|
| C | -0.657809 | -0.763140 | -1.285874 |
| C | -0.624424 | -0.725330 | 0.242907  |
| N | 0.697812  | -0.875711 | -1.833734 |
| H | -1.219124 | -1.654666 | -1.587787 |
| H | -1.213328 | 0.114388  | -1.656583 |
| H | 0.666644  | -1.094808 | -2.826926 |
| H | 1.183295  | 0.014136  | -1.734724 |
| H | -1.639277 | -0.777219 | 0.659280  |
| H | -0.080151 | -1.595985 | 0.630180  |
| C | 0.035403  | 0.516937  | 0.796505  |
| O | 0.029482  | 0.529959  | 2.153515  |
| O | 0.523402  | 1.420279  | 0.145975  |
| H | 0.475161  | 1.351424  | 2.435556  |

Carbonyl Fluoride

|   |           |          |           |
|---|-----------|----------|-----------|
| C | 0.126041  | 0.000000 | -0.072770 |
| F | -0.016398 | 0.000000 | 1.246229  |
| O | 1.147316  | 0.000000 | -0.662403 |
| F | -1.087465 | 0.000000 | -0.608913 |

$\alpha$ -L-Glycine

|   |           |           |           |
|---|-----------|-----------|-----------|
| N | 1.974825  | 0.077629  | -0.027643 |
| C | 0.755597  | -0.671614 | 0.206555  |
| C | -0.547328 | 0.088230  | -0.026380 |
| O | -1.629456 | -0.693153 | 0.219176  |
| O | -0.638876 | 1.242877  | -0.385068 |
| H | 2.005683  | 0.419202  | -0.986114 |
| H | 2.007077  | 0.902347  | 0.568231  |
| H | 0.741512  | -1.563019 | -0.432911 |
| H | 0.744434  | -1.046489 | 1.237615  |
| H | -2.425436 | -0.152930 | 0.052765  |

Phosgene

|    |           |          |           |
|----|-----------|----------|-----------|
| C  | 0.063342  | 0.000000 | 0.492883  |
| O  | 0.214633  | 0.000000 | 1.666408  |
| Cl | 1.390959  | 0.000000 | -0.666332 |
| Cl | -1.514319 | 0.000000 | -0.291819 |

Succinic Acid

|   |           |          |           |
|---|-----------|----------|-----------|
| C | 1.250346  | 0.000000 | 1.475173  |
| O | 1.088040  | 0.000000 | 2.822531  |
| O | 2.345488  | 0.000000 | 0.952200  |
| H | 1.979178  | 0.000000 | 3.220749  |
| C | -0.080211 | 0.000000 | 0.759077  |
| C | 0.080211  | 0.000000 | -0.759077 |

|   |           |           |           |
|---|-----------|-----------|-----------|
| H | -0.654861 | -0.870542 | 1.096985  |
| H | -0.654861 | 0.870542  | 1.096985  |
| C | -1.250346 | 0.000000  | -1.475173 |
| H | 0.654861  | 0.870542  | -1.096985 |
| H | 0.654861  | -0.870542 | -1.096985 |
| O | -1.088040 | 0.000000  | -2.822531 |
| O | -2.345488 | 0.000000  | -0.952200 |
| H | -1.979178 | 0.000000  | -3.220749 |

$\alpha$ -L-Tyrosine

|   |           |           |           |
|---|-----------|-----------|-----------|
| C | 3.313487  | 0.052025  | 0.084003  |
| C | 2.666979  | -1.110676 | -0.343281 |
| C | 1.301678  | -1.074685 | -0.644557 |
| C | 0.558217  | 0.106653  | -0.529225 |
| C | 1.233252  | 1.263108  | -0.100761 |
| C | 2.591805  | 1.245391  | 0.204558  |
| C | -0.924310 | 0.139543  | -0.825540 |
| C | -1.797653 | 0.099009  | 0.473035  |
| C | -3.252844 | 0.288508  | 0.073933  |
| O | -3.820456 | 1.356691  | -0.006840 |
| O | 4.649033  | 0.090891  | 0.394508  |
| N | -1.646571 | -1.087898 | 1.310585  |
| O | -3.854096 | -0.882793 | -0.260139 |
| H | -1.542908 | 0.973256  | 1.079991  |
| H | -1.202057 | -0.713748 | -1.457008 |
| H | -1.175773 | 1.052387  | -1.381453 |
| H | 0.686344  | 2.199744  | -0.010530 |
| H | 3.107468  | 2.143932  | 0.530062  |
| H | 3.223202  | -2.040976 | -0.447314 |
| H | 0.814049  | -1.985205 | -0.986372 |
| H | 5.044088  | -0.785934 | 0.268513  |
| H | -1.929031 | -1.927090 | 0.807058  |
| H | -0.670494 | -1.200124 | 1.578288  |
| H | -4.768409 | -0.672528 | -0.528547 |

Urea

|   |          |           |           |
|---|----------|-----------|-----------|
| C | 0.000000 | 0.000000  | 0.138512  |
| N | 0.000000 | 1.163452  | -0.598116 |
| N | 0.000000 | -1.163452 | -0.598116 |
| O | 0.000000 | 0.000000  | 1.365692  |
| H | 0.000000 | 2.031989  | -0.085311 |
| H | 0.000000 | 1.197831  | -1.606182 |
| H | 0.000000 | -2.031989 | -0.085311 |
| H | 0.000000 | -1.197831 | -1.606182 |
